# Supplementary material for: A Critical Review of the Antimicrobial and Antibiofilm Activities of Green-Synthesized Plant-Based Metallic Nanoparticles
Source: MDPI journal article supplement (doi:10.3390/nano12111841), 2022-05-27
Supplement: s1 [file s1]

Table S1. Green silver nanoparticles exhibiting antimicrobial activity

| Plant type                 | Part used | Operative conditions for synthesis                                                              | NP characteristics (Shape and size) | Microiological analyses (operative conditions)                                           |                                                                                                                                                                                                                   |                                           | Ref.  |
|----------------------------|-----------|-------------------------------------------------------------------------------------------------|-------------------------------------|------------------------------------------------------------------------------------------|-------------------------------------------------------------------------------------------------------------------------------------------------------------------------------------------------------------------|-------------------------------------------|-------|
|                            |           |                                                                                                 |                                     | Methods, incubation temperature, incubation time, pH, inoculum density, positive control | Tested bacteria and fungi                                                                                                                                                                                         | MIC, ZOI or PI*                           |       |
| <i>Piper longum</i>        | Catkin    | Silver nitrate 1 mM/<br>plant extract 10 %<br>(19:1 v/v)<br>95°C<br>Incubation time NM<br>pH NM | Spherical<br>10–42 nm               | Diffusion<br>37°C<br>24 h<br>pH NM<br>Inoculum NM<br>No control                          | <i>B. cereus</i> MTCC 1272<br><i>E. coli</i> MTCC 1687<br><i>K. pneumoniae</i> MTCC 530<br><i>P. mirabilis</i> MTCC 425<br><i>P. aeruginosa</i> MTCC 1688<br><i>S. typhi</i> MTCC 531<br><i>S. aureus</i> MTCC 96 | 12<br>13<br>14<br>15<br>11<br>12<br>11 mm | [465] |
| <i>Carissa carandas</i>    | Leaves    | Silver nitrate 1 mM/<br>plant extract 10 % (9:1 v/v)<br>60°C<br>1 h<br>pH 7.2                   | Spherical<br>30 nm                  | Diffusion<br>37°C<br>24 h<br>pH NM<br>1×10 <sup>8</sup> CFU/ml<br>No control             | <i>S. typhi</i><br><i>Enterococcus faecalis</i><br><i>Shigella flexneri</i><br><i>Citrobacter spp</i><br><i>Gonococci spp</i>                                                                                     | 12<br>16<br>24<br>14<br>21 mm             | [466] |
| <i>Solanum tricornatum</i> | Leaves    | Silver nitrate 1 mM/<br>plant extract 1.5 %<br>(1:10 v/v)<br>37°C<br>48 h<br>pH NM              | Irregular<br>26.5 nm                | Diffusion<br>35°C<br>18 h<br>pH NM<br>Inoculum NM<br>No control                          | <i>S. aureus</i><br><i>P. aeruginosa</i><br><i>E. coli</i><br><i>K. pneumoniae</i>                                                                                                                                | 30<br>12<br>14<br>18 mm                   | [467] |
| <i>Cleome viscosa</i>      | Fruit     | Silver nitrate 1 mM/<br>plant extract 10 %<br>(10:1 v/v)<br>25 ± 2°C<br>24 h                    | Spherical<br>5–30 nm                | Diffusion<br>37°C<br>18 h<br>pH NM<br>1×10 <sup>7</sup> CFU/ml                           | <i>B. subtilis</i><br><i>S. aureus</i><br><i>E. coli</i><br><i>K. pneumoniae</i>                                                                                                                                  | 12<br>13<br>13<br>11 mm                   | [468] |

|                           |        |                                                                                                       |                            |                                                                                  |                                                                                                                                                 |                               |       |
|---------------------------|--------|-------------------------------------------------------------------------------------------------------|----------------------------|----------------------------------------------------------------------------------|-------------------------------------------------------------------------------------------------------------------------------------------------|-------------------------------|-------|
|                           |        | pH NM                                                                                                 |                            | Tétracycline**                                                                   |                                                                                                                                                 |                               |       |
| <i>Musa paradisiaca</i>   | Peels  | Silver nitrate 1.75 mM/ plant extract 1 % (5:1 v/v)<br>40–100°C<br>72 h<br>pH 4.5                     | Spherical<br>23.7 nm       | Diffusion<br>37°C<br>24 h<br>pH NM<br>1×10 <sup>8</sup> CFU/ml<br>Levofloxacin** | <i>B. subtilis</i><br><i>S. aureus</i> ATCC 6538<br><i>P. aeruginosa</i> ATCC 9027<br><i>P. aeruginosa</i> isolated<br><i>E. coli</i> ATCC 8739 | 12<br>16<br>20<br>18<br>17 mm | [469] |
| <i>Azadirachta indica</i> | Leaves | Silver nitrate 1 mM/ plant extract 10 % (10:1 v/v)<br>Room temperature<br>Incubation time NM<br>pH NM | Spherical<br>5–20 nm       | Diffusion<br>37°C<br>24 h<br>pH NM<br>Inoculum NM<br>No control                  | <i>S. aureus</i><br><i>E. coli</i>                                                                                                              | 9<br>9 mm                     | [470] |
| <i>Centella asiatica</i>  | Leaves | Silver nitrate 1 mM/ plant extract 1.5 % (1:2 v/v)<br>37°C<br>24–48h<br>pH NM                         | Irregular<br>42 nm         | Diffusion<br>35 °C<br>18 h<br>pH NM<br>Inoculum NM<br>No control                 | <i>S. aureus</i><br><i>P. aeruginosa</i><br><i>K. pneumoniae</i><br><i>E. coli</i>                                                              | 15<br>16<br>0 mm<br>12        | [471] |
| <i>Citrus sinensis</i>    |        |                                                                                                       | Irregular<br>41 nm         |                                                                                  | <i>S. aureus</i><br><i>P. aeruginosa</i><br><i>K. pneumoniae</i><br><i>E. coli</i>                                                              | 12<br>16<br>11<br>12 mm       |       |
| <i>Rheum ribes</i>        | Leaves | Silver nitrate 1 mM/ plant extract 5 % (10:1 w/v)<br>75°C<br>48 h<br>pH NM                            | Spherical<br>18.2 ± 3.6 nm | Diffusion<br>37 °C<br>24 h<br>pH NM<br>1×10 <sup>8</sup> CFU/ml<br>No control    | <i>E. coli</i> ATCC 8739<br><i>S. aureus</i> ATCC 6538<br>MRSA ATCC43300<br><i>B. subtilis</i> ATCC6633                                         | 15<br>17<br>17<br>19 mm       | [472] |
| <i>Sisymbrium irio</i>    | Leaves | Silver nitrate 1 mM/ plant extract 10 % (9:1 v/v)<br>60 °C                                            | Spherical<br>45 nm         | Diffusion<br>37°C<br>24 h<br>pH NM                                               | <i>P. aeruginosa</i><br><i>Acinetobacter baumannii</i><br><i>E. coli</i> ATCC 25922                                                             | 20<br>18<br>6 mm              | [473] |

|                               |        |                                                                                     |                                      |                                                                                             |                                                                                                                                                                                                                                                                                                                                                                                                                                                                                                                                   |                                                                                                |       |
|-------------------------------|--------|-------------------------------------------------------------------------------------|--------------------------------------|---------------------------------------------------------------------------------------------|-----------------------------------------------------------------------------------------------------------------------------------------------------------------------------------------------------------------------------------------------------------------------------------------------------------------------------------------------------------------------------------------------------------------------------------------------------------------------------------------------------------------------------------|------------------------------------------------------------------------------------------------|-------|
|                               |        | 24 h<br>NM                                                                          |                                      | 1×10 <sup>6</sup> CFU/ ml<br>Meropenem 10 µg                                                |                                                                                                                                                                                                                                                                                                                                                                                                                                                                                                                                   |                                                                                                |       |
| <i>Tephrosia apollinea</i>    | Seeds  | NM<br>NM<br>NM<br>NM                                                                | Spherical and<br>cubic<br>300–700 nm | Dilution<br>37°C<br>24 h<br>pH NM<br>1–2×10 <sup>8</sup> CFU/ml<br>No control               | <i>E. coli</i> ATCC 25922<br><i>S. aureus</i> ATCC 29213                                                                                                                                                                                                                                                                                                                                                                                                                                                                          | 31.25<br>15.625<br>µg/ml                                                                       | [474] |
| <i>Picea abies</i>            | Bark   | Silver acetate 1 mM /<br>plant extract 10 % (9:1<br>v/v)<br>60°C<br>3 h<br>pH 4     | Spherical<br>165.5 nm                | Dilution<br>Temperature NM<br>Incubation time NM<br>pH NM<br>Inoculum NM<br>Ciprofloxacin** | <i>S. aureus</i> ATCC 25923<br><i>S. aureus</i> ATCC 43300<br><i>E. coli</i> ATCC 25922<br><i>P. aeruginosa</i> ATCC 27853<br><i>K. pneumoniae</i> ATCC 700603                                                                                                                                                                                                                                                                                                                                                                    | 1,24<br>1.86<br>>1.86<br>>1.86<br>1.86 mg/ml                                                   | [475] |
| <i>Aesculus hippocastanum</i> | Leaves | Silver nitrate 5 mM/<br>plant extract 20 % (3:1<br>v/v)<br>95 °C<br>10 min<br>pH NM | Spherical<br>50 ± 5 nm               | Diffusion<br>37°C<br>18 –24h<br>pH NM<br>1×10 <sup>8</sup> CFU/ml<br>Ampicillin 10 µg       | <i>S. aureus</i> ATCC 25923<br><i>S. epidermidis</i> ATCC 12228<br><i>Micrococcus luteus</i> ATCC<br>10240<br><i>B. subtilis</i> ATCC 29213<br><i>B. cereus</i> NRLL B-3008<br><i>E. faecalis</i> ATCC 292112<br><i>P. aeruginosa</i> ATCC 27853<br><i>E. coli</i> ATCC 25922<br><i>E. aerogenes</i> ATCC 13048<br><i>K. pneumonia</i> ATCC 13883<br><i>P. mirabilis</i> ATCC 25933<br><i>Listeria monocytogenes</i><br>ATCC 19115<br><i>Corynebacterium renale</i> ATCC<br>19412<br><i>Pseudomonas fluorescens</i><br>ATCC 49838 | 18<br>13<br>17<br><br>15<br>15<br>11<br>20<br>10<br>11<br>13<br>10<br>13<br><br>12<br><br>8 mm | [476] |

|                            |        |                                                                                                 |                                    |                                                                                                 |                                                                                                                           |                               |       |
|----------------------------|--------|-------------------------------------------------------------------------------------------------|------------------------------------|-------------------------------------------------------------------------------------------------|---------------------------------------------------------------------------------------------------------------------------|-------------------------------|-------|
| <i>Galega officinalis</i>  | Leaves | Silver nitrate 1.6 mM/<br>plant extract 15 % (1:1<br>v/v)<br>Room temperature<br>24 h<br>pH 11  | Spherical<br>8–34 nm               | Dilution<br>37°C<br>24 h<br>pH NM<br>2×10 <sup>6</sup> CFU/ml<br>Streptomycin**<br>Gentamycin** | <i>E. coli</i><br><i>Pseudomonas syringae</i><br><i>S. aureus</i>                                                         | 5<br>10<br>50 µg/ml           | [477] |
| <i>Alpinia nigra</i>       | Fruits | Silver nitrate 2 mM/<br>plant extract 10 %<br>(6.25 :1 v/v)<br>Room temperature<br>2 h<br>pH NM | Spherical<br>65.9 nm               | Diffusion<br>37°C<br>16–18 h<br>pH NM<br>1×10 <sup>8</sup> CFU/ml<br>Neomycin 1 mg/ml           | <i>S. aureus</i> ATCC 11682<br><i>K. pneumoniae</i> ATCC 13883                                                            | 18<br>20 mm                   | [478] |
|                            |        |                                                                                                 |                                    | Diffusion<br>30°C<br>24–48h<br>pH NM<br>1×10 <sup>8</sup> CFU/ml<br>Nystatin 2mg/ml             | <i>C. albicans</i> MTCC 3017                                                                                              | 12 mm                         |       |
| <i>Impatiens balsamina</i> | Leaves | Silver nitrate 10 mM/<br>plant extract 10 % (1:1<br>v/v)<br>60°C<br>5h<br>pH NM                 | Spherical<br>12 –23.3 nm           | Diffusion<br>37°C<br>24 h<br>pH NM<br>1×10 <sup>8</sup> CFU/ml<br>Ciprofloxacin**               | <i>S. aureus</i><br><i>E. coli</i>                                                                                        | 11<br>10 mm                   | [479] |
| <i>Lantana camara</i>      |        |                                                                                                 | Spherical<br>3.2–14.1 nm           |                                                                                                 | <i>S. aureus</i><br><i>E. coli</i>                                                                                        | 14<br>18 mm                   |       |
| <i>Juniperus procera</i>   | Leaves | Silver nitrate 1 mM /<br>plant extract 20 % (9:1<br>v/v)<br>Room temperature<br>24h<br>pH NM    | Spherical and<br>cubic<br>30–90 nm | Diffusion<br>32°C<br>18 h<br>pH NM<br>Inoculum NM<br>Penicillin 10 µg                           | <i>B. subtilis</i><br><i>Micrococcus luteus</i><br><i>Proteus mirabilis</i><br><i>K. pneumoniae</i><br><i>C. albicans</i> | 28<br>28<br>29<br>18<br>24 mm | [480] |

|                               |          |                                                                                       |                             |                                                                                      |                                                                                       |                         |       |
|-------------------------------|----------|---------------------------------------------------------------------------------------|-----------------------------|--------------------------------------------------------------------------------------|---------------------------------------------------------------------------------------|-------------------------|-------|
| <i>Acalypha wilkesiana</i>    | Leaves   | Silver nitrate 1 mM/<br>plant extract 10 % (9:1<br>v/v)<br>90–100°C<br>90 min<br>pH 9 | Spherical<br>10–26 nm       | Diffusion<br>37°C<br>24 h<br>pH 9<br>1.5×10 <sup>8</sup> CFU/ml<br>Chloramphenicol** | <i>E. coli</i><br><i>S. aureus</i>                                                    | 17<br>19 mm             | [481] |
| <i>Selaginella bryopteris</i> | Leaves   | Silver nitrate 1 mM/<br>plant extract 25 %<br>(10:1 v/v)<br>80°C<br>30 min<br>pH NM   | Spherical<br>5–10 nm        | Diffusion<br>37 °C<br>24–48 h.<br>pH ±7<br>Inoculum NM<br>Ciproflaxin**              | <i>E. coli</i><br><i>S. aureus</i>                                                    | 12<br>11 mm             | [482] |
|                               |          |                                                                                       |                             | Diffusion<br>25°C<br>48–72 h<br>pH 6.8<br>Inoculum size NM<br>Amphotericin B**       | <i>A. niger</i>                                                                       | 2 mm                    |       |
| <i>Camellia sinensis</i>      | Leaves   | Silver nitrate 10 mM /<br>plant extract 15 %<br>(30:1 v/v)<br>30°C<br>10 min<br>pH NM | Spherical<br>30–40 nm       | Diffusion<br>37°C<br>24 h<br>pH NM<br>1×10 <sup>6</sup> CFU/ml<br>No control         | <i>E. coli</i> MTCC 443<br><i>S. aureus</i> MTCC 10536<br><i>S. pyogenes</i> MTCC 442 | 14<br>13<br>10 MM       | [483] |
| <i>Citrus sinensis</i>        | Pericarp | Silver nitrate 50 mM/<br>plant extract 0.3 %<br>(1:1 v/v)<br>60°C<br>2 h<br>pH NM     | Spherical<br>107.1 ± 2.6 nm | Dilution<br>37°C<br>24 h<br>pH NM<br>1×10 <sup>8</sup> CFU/ml<br>Gentamycin**        | <i>E. coli</i><br>MRSA                                                                | 0.5<br>0.5<br>0.5 µg/ml | [484] |

|                                |                          |                                                                                                 |                                             |                                                                                              |                                                                                                                                             |                             |       |
|--------------------------------|--------------------------|-------------------------------------------------------------------------------------------------|---------------------------------------------|----------------------------------------------------------------------------------------------|---------------------------------------------------------------------------------------------------------------------------------------------|-----------------------------|-------|
| <i>Artemisia marschalliana</i> | Aerial part              | Silver nitrate 1 mM/<br>plant extract 10 %<br>(25 :1 v/v)<br>Room temperature<br>5 min<br>pH NM | Spherical<br>5–20 nm                        | Diffusion<br>37°C<br>24 h<br>pH NM<br>1×10 <sup>7</sup> CFU/ml<br>Ampicillin**               | <i>B. cereus</i> ATCC 14579<br><i>S. aureus</i> ATCC 6538<br><i>P. aeruginosa</i> ATCC 15442<br><i>Acinetobacter baumannii</i> ATCC 19606   | 9<br>16<br>13<br>11 mm      | [485] |
| <i>Gleichenia pectinata</i>    | Fern                     | Silver nitrate 5 mM/<br>plant extract 10 % (5:1<br>v/v)<br>Room temperature<br>30 min<br>pH NM  | Spherical<br>7.5 ± 2.9 nm                   | Diffusion<br>Temperature NM<br>Incubation NM<br>pH NM<br>Inoculum NM<br>Streptomycin**       | <i>P. aeruginosa</i><br><i>E. coli</i><br><i>K. pneumoniae</i>                                                                              | 15<br>11<br>10 mm           | [486] |
|                                |                          |                                                                                                 |                                             | Diffusion<br>Temperature NM<br>Incubation time NM<br>pH NM<br>Inoculum size NM<br>Nystatin** | <i>C. albicans</i>                                                                                                                          | 12 mm                       |       |
| <i>Cymbopogon citratus</i>     | Leaves and<br>raw fruits | Silver nitrate 1 mM /<br>plant extract 10 %<br>(9:1 v/v)<br>37°C<br>24 h<br>pH NM               | Spherical<br>20–40 nm                       | Diffusion<br>37°C<br>24 h<br>pH NM<br>1.5×10 <sup>6</sup> CFU/ml<br>No control               | <i>B. cereus</i> ATCC BAA512<br><i>E. coli</i> ATCC 11775<br><i>P. aeruginosa</i> ATCC 19429<br><i>Bacillus licheniformis</i> D5MZ-<br>8059 | 12<br>16<br>18<br>10 mm     | [487] |
| <i>Rhus coriaria</i>           | Leaves                   | Silver nitrate 1 mM/<br>plant extract 5 % (1:1<br>v/v)<br>25°C<br>2 h<br>pH NM                  | Spherical and<br>tetragonal<br>22.4–37.6 nm | Diffusion<br>37°C<br>24 h<br>pH NM<br>1×10 <sup>6</sup> CFU/ml                               | <i>P. vulgaris</i><br><i>S. aureus</i><br><i>Erwinia carotovora</i><br><i>B. subtilis</i><br><i>K. pneumoniae</i>                           | 8<br>8<br>11<br>10<br>10 mm | [488] |
| <i>Carthamus tinctorius</i>    | Leaves                   |                                                                                                 | Spherical and<br>tetragonal<br>14.5–35.8 nm | No control                                                                                   | <i>P. vulgaris</i><br><i>S. aureus</i><br><i>Erwinia carotovora</i>                                                                         | 14<br>14<br>11              |       |

|                               |        |                                                                                                       |                              |                                                                                                                |                                                                                                                             |                               |       |
|-------------------------------|--------|-------------------------------------------------------------------------------------------------------|------------------------------|----------------------------------------------------------------------------------------------------------------|-----------------------------------------------------------------------------------------------------------------------------|-------------------------------|-------|
|                               |        |                                                                                                       |                              |                                                                                                                | <i>B. subtilis</i><br><i>K. pneumoniae</i>                                                                                  | 9<br>15 mm                    |       |
| <i>Verbena officinalis</i>    | Leaves | Silver nitrate 2 mM /<br>plant extract 10 %<br>(10:1 v/v)<br>37°C<br>24 h<br>pH NM                    | Spherical<br>42.57 ± 5.34 nm | Diffusion<br>37°C<br>24 h<br>pH NM<br>1.5×10 <sup>6</sup> CFU/ml<br>No control                                 | <i>Listeria monocytogenes</i><br><i>Yersinia ruckeri</i><br><i>Vibrio cholera</i>                                           | 15<br>16<br>13 mm             | [489] |
| <i>Vaccinium macrocarpon</i>  | NM     | Silver nitrate 10 mM /<br>plant extract 0.8 %<br>(10:1 v/v)<br>30°C<br>24 h<br>pH 6                   | Spherical<br>1.4–11.1 nm     | Dilution<br>37°C<br>24 h<br>pH NM<br>Inoculum size NM<br>No control                                            | <i>S. aureus</i><br><i>P. aeruginosa</i><br>MRSA                                                                            | 39.5<br>25.3<br>39.5 µg/ml    | [490] |
| <i>Garcinia quaesita</i>      | Fruits | Silver nitrate 1 mM/<br>plant extract 1 % (10:1<br>v/v)<br>100°C<br>Room temperature<br>24 h<br>pH NM | Spherical<br>7–22 nm         | Diffusion<br>37°C<br>24 h<br>pH NM<br>1.5×10 <sup>8</sup> CFU/ml<br>Vancomycin 10 mg/ml<br>Gentamycin 10 mg/ml | <i>S. aureus</i><br><i>P. aeruginosa</i><br><i>E. coli</i><br>MRSA<br><i>C. albicans</i> ATCC 10231                         | 16<br>18<br>16<br>22<br>21 mm | [491] |
| <i>Arisaema flavum</i>        | Tubers | Silver nitrate**/ plant<br>extract 5 % (ratio NM)<br>Room temperature<br>4 h<br>pH NM                 | Spherical<br>5–8 nm          | Diffusion<br>37 °C<br>18–20 h<br>pH NM<br>Inoculum size NM<br>Streptomycin 1 mg/ml                             | <i>E. coli</i><br><i>B. subtilis</i> BL-21<br><i>S. aureus</i><br><i>Pseudomonas putida</i><br><i>E. coli</i> substrain QH4 | 16<br>18<br>23<br>12<br>11 mm | [492] |
| <i>Olea europaea</i>          | Leaves | Silver nitrate 1 mM /<br>plant extract 1.5 %<br>(2:3 v/v)<br>37 °C<br>30 min                          | Spherical<br>45 ± 2 nm       | Dilution<br>37°C<br>24 h<br>pH NM<br>1×10 <sup>6</sup> CFU/ml                                                  | <i>E. coli</i><br><i>S. enterica</i><br><i>S. aureus</i>                                                                    | 9.38<br>18.75<br>9.38 µg/ml   | [493] |
| <i>Rosmarinus officinalis</i> |        |                                                                                                       | Spherical                    |                                                                                                                | <i>E. coli</i>                                                                                                              | 4.69                          |       |

|                           |       |                                                                                   |                    |                                                                                                       |                                                                                                                                                                                                         |                                        |       |
|---------------------------|-------|-----------------------------------------------------------------------------------|--------------------|-------------------------------------------------------------------------------------------------------|---------------------------------------------------------------------------------------------------------------------------------------------------------------------------------------------------------|----------------------------------------|-------|
|                           |       | pH NM                                                                             | 38 ± 3 nm          | No control                                                                                            | <i>S. enterica</i><br><i>S. aureus</i>                                                                                                                                                                  | 18.75<br>4.69 µg/ml                    |       |
| <i>Bergenia ciliate</i>   | Roots | Silver nitrate 1 mM /<br>plant extract 4 % (9:1<br>v/v)<br>37 °C<br>24 h<br>pH NM | Spherical<br>25 nm | Diffusion<br>37 °C<br>12–16 h<br>pH NM<br>1×10 <sup>7</sup> –10 <sup>8</sup> CFU/ml<br>Streptomycin** | <i>S. aureus</i> KX 262679<br><i>B. cereus</i> KX 262674<br><i>E. coli</i> ATCC 10536<br><i>S. typhi</i> ATCC 6539<br><i>P. aeruginosa</i> ATCC 9027<br><i>Staphylococcus haemolyticus</i><br>KX262673  | 13<br>0<br>0<br>13<br>15<br>0 mm       | [494] |
| <i>Bergenia stracheyi</i> |       |                                                                                   | Spherical<br>73 nm |                                                                                                       | <i>S. aureus</i> KX 262679<br><i>B. cereus</i> KX 262674<br><i>E. coli</i> ATCC 10536<br><i>S. typhi</i> ATCC 6539<br><i>P. aeruginosa</i> ATCC 9027<br><i>Staphylococcus haemolyticus</i><br>KX 262673 | 13<br>0<br>0<br>13<br>16<br>0 mm       |       |
| <i>Rumex dantatus</i>     |       |                                                                                   | Spherical<br>50 nm |                                                                                                       | <i>S. aureus</i> KX 262679<br><i>B. cereus</i> KX 262674<br><i>E. coli</i> ATCC 10536<br><i>S. typhi</i> ATCC 6539<br><i>P. aeruginosa</i> ATCC 9027<br><i>Staphylococcus haemolyticus</i><br>KX 262673 | 16<br>0<br>0<br>12<br>14<br>16<br>0 mm |       |
| <i>Rumex hastatus</i>     |       |                                                                                   | Spherical<br>48 nm |                                                                                                       | <i>S. aureus</i> KX 262679<br><i>B. cereus</i> KX 262674<br><i>E. coli</i> ATCC 10536<br><i>S. typhi</i> ATCC 6539<br><i>P. aeruginosa</i> ATCC 9027<br><i>Staphylococcus haemolyticus</i><br>KX 262673 | 15<br>8<br>10<br>18<br>17<br>9 mm      |       |



|                                  |         |                                                                                               |                        |                                                                                 |                                                                                                                                                                                                                                                                                          |                                                          |       |
|----------------------------------|---------|-----------------------------------------------------------------------------------------------|------------------------|---------------------------------------------------------------------------------|------------------------------------------------------------------------------------------------------------------------------------------------------------------------------------------------------------------------------------------------------------------------------------------|----------------------------------------------------------|-------|
| <i>Bougainvillea spectabilis</i> | Flowers | Silver nitrate 1 mM/<br>plant extract 5 % (9:1<br>v/v)<br>Room temperature<br>24 h<br>pH NM   | Spherical<br>16–83 nm  | Diffusion<br>37°C<br>24 h<br>pH NM<br>Inoculum size NM<br>No control            | <i>S. typhi</i><br><i>S. aureus</i><br><i>B. subtilis</i><br><i>B. cereus</i><br><i>Enterococcus faecalis</i><br><i>Corynebacterium diphtheria</i><br><i>Streptococcus pneumoniae</i><br><i>K. pneumoniae</i><br><i>E. coli</i><br><i>Enterobacter aerogenes</i><br><i>P. aeruginosa</i> | 4<br>8<br>15<br>9<br>6<br>6<br>9<br>3<br>7<br>10<br>3 mm | [495] |
| <i>Bauhinia acuminata</i>        | Leaves  | Silver nitrate 1 mM/<br>plant extract 10 %<br>(10:1 v/v)<br>Room temperature<br>24 h<br>pH NM | Irregular<br>78–110 nm | Dilution<br>37° C<br>24 h<br>pH NM<br>1×10 <sup>5</sup> CFU/ml<br>Ciproflaxin** | <i>E. coli</i><br><i>S. aureus</i>                                                                                                                                                                                                                                                       | 900<br>750 µg/ml                                         | [496] |
| <i>Prosopis juliflora</i>        | Leaves  | Silver nitrate 2 mM/<br>plant extract 10 % (1:1<br>v/v)<br>Room temperature<br>24 h<br>pH NM  | Spherical<br>10–20 nm  | Diffusion<br>37° C<br>24 h<br>pH NM<br>10 <sup>5</sup> CFU/ml<br>Kanamycin**    | <i>E. coli</i><br><i>P. aeruginosa</i>                                                                                                                                                                                                                                                   | 15<br>12 mm                                              | [172] |
| <i>Coriandrum sativum</i>        | Leaves  | Silver nitrate 1 mM/<br>plant extract 10 % (4:1<br>v/v)<br>75°C<br>20 min<br>pH 8.6           | Ball shape<br>11.9 nm  | Diffusion<br>37°C<br>24 h<br>pH NM<br>Inoculum size NM<br>Gentamycin**          | <i>Pasteurella multocida</i><br><i>Enterobacter aerogenes</i><br><i>S. aureus</i><br><i>B. subtilis</i>                                                                                                                                                                                  | 10<br>11<br>12<br>14 mm                                  | [497] |
| <i>Datura metel</i>              | Leaves  | Silver nitrate 1 mM/<br>plant extract 30 %<br>(20:1 v/v)                                      | Spherical<br>20 nm     | Diffusion<br>28°C<br>48 h                                                       | <i>E. coli</i><br><i>Pseudomonas spp</i>                                                                                                                                                                                                                                                 | 14<br>11 mm                                              | [498] |

|                               |           |                                                                                                |                       |                                                                                                     |                                                                                           |                         |       |
|-------------------------------|-----------|------------------------------------------------------------------------------------------------|-----------------------|-----------------------------------------------------------------------------------------------------|-------------------------------------------------------------------------------------------|-------------------------|-------|
|                               |           | 60°C<br>2 h<br>pH NM                                                                           |                       | pH NM<br>Inoculum size NM<br>No control                                                             |                                                                                           |                         |       |
| <i>Abelmoschus esculentus</i> | Vegetable | Silver nitrate 45 mM/<br>plant extract 25 % (1:5<br>v/v)<br>Room temperature<br>12 h<br>NM     | Spherical<br>30 nm    | Diffusion<br>37°C<br>24 h<br>pH 7.4<br>Inoculum size NM<br>No control                               | <i>S. aureus</i><br><i>E. coli</i>                                                        | 11<br>17 mm             | [499] |
| <i>Tithonia diversifolia</i>  | Leaves    | Silver nitrate 1 mM/<br>plant extract 2 % (9 :1<br>v/v)<br>Room temperature<br>90 min<br>pH NM | Spherical<br>10–26 nm | Diffusion<br>37°C<br>24 h<br>pH NM<br>Inoculum size NM<br>Ciprofloxacin**                           | <i>E. coli</i><br><i>S. typhirium</i><br><i>Salmonella enterica</i><br><i>B. subtilis</i> | 13<br>12<br>13<br>15 mm | [500] |
| <i>Raphanus sativus</i>       | Roots     | Silver nitrate 1 mM/<br>plant extract 16 % (9:1<br>v/v)<br>Room temperature<br>15 min<br>pH NM | Polygonal<br>30–60 nm | Diffusion<br>37°C<br>24 h<br>pH NM<br>Inoculum size NM<br>Amikacin**                                | <i>E. coli</i><br><i>K. pneumoniae</i><br><i>B. subtilis</i><br><i>S. aureus</i>          | 10<br>10<br>14<br>12 mm | [501] |
| <i>Ribes khorasanicum</i>     | Fruits    | Silver nitrate 1 mM/<br>plant extract 1.2 %<br>(9:1 v/v)<br>70°C<br>1 h<br>pH NM               | Spherical<br>15–45 nm | Diffusion<br>37 °C<br>24 h<br>pH NM<br>1.5×10 <sup>8</sup> CFU/ml<br>Gentamicin**<br>Streptomycin** | <i>E. coli</i><br><i>P. aeruginosa</i><br><i>S. aureus</i>                                | 9<br>9<br>13 mm         | [502] |
| <i>Withania coagulans</i>     | Leaves    | Silver nitrate 1 mM/<br>plant extract 5 % (1:9<br>v/v)<br>27 °C                                | Spherical<br>7–32 nm  | Diffusion<br>37 °C<br>24 h<br>pH NM                                                                 | <i>E. coli</i><br><i>S. aureus</i><br><i>K. pneumoniae</i>                                | 4<br>10<br>8 mm         | [503] |

|                              |            |                                                                                       |                            |                                                                                   |                                                                                                                                                                                                                    |                                     |       |
|------------------------------|------------|---------------------------------------------------------------------------------------|----------------------------|-----------------------------------------------------------------------------------|--------------------------------------------------------------------------------------------------------------------------------------------------------------------------------------------------------------------|-------------------------------------|-------|
|                              |            | 72 h<br>pH NM                                                                         |                            | Inoculum size NM<br>Ampicillin**                                                  |                                                                                                                                                                                                                    |                                     |       |
| <i>Eucalyptus citriodora</i> | Leaves     | Silver nitrate 1 mM/<br>plant extract 5 % (1:1<br>v/v)<br>28 °C<br>16h<br>pH NM       | Spherical<br>8–15 nm       | Dilution<br>37 °C<br>18 h<br>pH NM<br>1×10 <sup>8</sup> CFU/ml<br>No control      | <i>Acinetobacter baumannii</i>                                                                                                                                                                                     | 0.18<br>µg/ml                       | [504] |
| <i>Canarium ovatum</i>       | Leaves     | Silver nitrate 1.5 mM/<br>plant extract 10 %<br>(1:20 v/v)<br>25°C<br>40 min<br>pH NM | Spherical<br>119.7 ± 7 nm  | Diffusion<br>37°C<br>24 h<br>pH NM<br>1×10 <sup>6</sup> CFU/ml<br>Kanamycin 10 µg | <i>P. aeruginosa</i>                                                                                                                                                                                               | 15 mm                               | [505] |
| <i>Elaeocarpus ganitrus</i>  | Beads      | Silver nitrate 1 mM/<br>plant extract 10 % (9:1<br>v/v)<br>60–80°C<br>20 min<br>pH NM | Spherical<br>13.6–36.3 nm  | Diffusion<br>37°C<br>24 h<br>pH NM<br>1×10 <sup>5</sup> CFU/ml<br>Ampicillin**    | <i>S. typhimurium</i> MTCC 98<br><i>E. coli</i> MTCC 433<br><i>Clostridium perfringes</i> MTCC<br>450<br><i>Listeria monocytogenes</i> MTCC<br>657<br><i>S. aureus</i> MTCC 740<br><i>Vibrio mimicus</i> MTCC 4434 | 29<br>20<br>28<br>29<br>29<br>26 mm | [506] |
| <i>Oryza sativa</i>          | Beads      | Silver nitrate 10 mM/<br>plant extract 0.9 %<br>(1:100 v/v)<br>75°C<br>60 min<br>NM   | Spherical<br>80.4 ± 2.8 nm | Diffusion<br>37°C<br>24 h<br>pH NM<br>1.5×10 <sup>6</sup> CFU/ml<br>No control    | <i>E. coli</i> ATCC 2592<br><i>S. aureus</i> ATCC 25923                                                                                                                                                            | 13<br>8 mm                          | [507] |
| <i>Glaucium corniculatum</i> | Arial part | Silver nitrate 10 mM/<br>plant extract 8 % (8:1<br>v/v)<br>60°C                       | Spherical<br>45 nm         | Diffusion<br>37°C<br>16 h<br>pH NM                                                | <i>E. coli</i> ATCC 35218<br><i>S. typhimurium</i> ATCC 14028<br><i>S. aureus</i> ATCC 29213<br><i>B. cereus</i> ATCC 14579                                                                                        | 10<br>9<br>8<br>8 mm                | [508] |

|                                  |        |                                                                                                            |                        |                                                                                |                                                                                                                                                |                                     |       |
|----------------------------------|--------|------------------------------------------------------------------------------------------------------------|------------------------|--------------------------------------------------------------------------------|------------------------------------------------------------------------------------------------------------------------------------------------|-------------------------------------|-------|
|                                  |        | 1h<br>pH NM                                                                                                |                        | 1×10 <sup>5</sup> CFU/ml<br>No control                                         |                                                                                                                                                |                                     |       |
| <i>Elettaria cardamom</i>        | Seeds  | Silver nitrate 1 mM/<br>plant extract 40 % (9:1<br>v/v)<br>Room temperature<br>24 h<br>NM                  | Spherical<br>40–70 nm  | Diffusion<br>37°C<br>24 h<br>pH NM<br>Inoculum size NM<br>No control           | <i>B. subtilis</i>                                                                                                                             | 14 mm                               | [509] |
| <i>Trigonella foenum-graecum</i> | Seeds  | Silver nitrate 1 mM/<br>plant extract 10 %<br>(10:1 v/v)<br>50–100°C<br>30 min<br>pH NM                    | Spherical<br>95–110 nm | Diffusion<br>37°C<br>24 h<br>pH NM<br>1×10 <sup>8</sup> CFU/ml<br>Ampicillin** | <i>S. aureus</i><br><i>P. aeruginosa</i><br><i>Proteus vulgaris</i><br><i>E. coli</i>                                                          | 17<br>12<br>6<br>9 mm               | [510] |
| <i>Synedrella nodiflora</i>      | Leaves | Silver nitrate 1 mM/<br>plant extract 25 % (9:1<br>v/v)<br>Room temperature<br>Incubation time NM<br>pH NM | Spherical<br>14.2 nm   | Diffusion<br>37°C<br>24–48 h<br>pH NM<br>Inoculum NM<br>No control             | <i>B. subtilis</i><br><i>Streptococcus spp</i><br><i>Pseudomonas spp</i><br><i>E. coli</i>                                                     | 9<br>8<br>11<br>14 mm               | [511] |
|                                  |        |                                                                                                            |                        | Diffusion<br>25°C<br>7 days<br>pH NM<br>Inoculum size NM<br>No control         | <i>Aspergillus spp</i><br><i>Penicillium spp</i>                                                                                               | 12<br>10 mm                         |       |
| <i>Cassia roxburghii</i>         | Leaves | Silver nitrate 1 mM/<br>plant extract 4 % (9:1<br>v/v)<br>Room temperature<br>24h<br>pH NM                 | Spherical<br>10–30 nm  | Diffusion<br>37°C<br>24 h<br>pH NM<br>Inoculum NM<br>Streptomycin 10 µg        | <i>B. subtilis</i><br><i>S. aureus</i><br><i>Micrococcus luteus</i><br><i>P. aeruginosa</i><br><i>E. coli</i><br><i>Enterobacter aerogenes</i> | 17<br>19<br>12<br>21<br>18<br>16 mm | [512] |

|                          |         |                                                                                                           |                                              |                                                                              |                                                                                                                                   |                                  |       |
|--------------------------|---------|-----------------------------------------------------------------------------------------------------------|----------------------------------------------|------------------------------------------------------------------------------|-----------------------------------------------------------------------------------------------------------------------------------|----------------------------------|-------|
| <i>Acacia rigidula</i>   | Stems   | Silver nitrate 1 mM/<br>plant extract 10 % (3:1<br>v/v)<br>60°C<br>1 h<br>pH NM                           | Spherical<br>8–66 nm                         | Dilution<br>37°C<br>20 h<br>pH NM<br>1×10 <sup>6</sup> CFU/ml<br>No control  | <i>E. coli</i> ATCC 11229<br><i>P. aeruginosa</i> ATCC 27853<br><i>P. aeruginosa</i> MDRS strain<br><i>B. subtilis</i> ATCC 23857 | 62.5<br>15.6<br>7.8<br>0.5 µg/ml | [313] |
| <i>Napier grass</i>      | Fibers  | Silver nitrate 5 mM/<br>plant extract 5 % (1:1<br>v/v)<br>80°C<br>24 h<br>pH NM                           | Triangle, cube<br>and spherical<br>10–100 nm | Diffusion<br>37 °C<br>48 h<br>pH 7<br>1×10 <sup>6</sup> CFU/ml<br>No control | <i>E. coli</i><br><i>S. aureus</i>                                                                                                | 32<br>33 mm                      | [513] |
| <i>Thymus vulgaris</i>   | Leaves  | Silver nitrate 1 mM/<br>plant extract 2 % (5:1<br>v/v)<br>Room temperature<br>Incubation time NM<br>pH NM | Spherical<br>95 nm                           | Dilution<br>37°C<br>24 h<br>pH NM<br>1×10 <sup>8</sup> CFU/ml<br>No control  | MRSA<br><i>E. coli</i>                                                                                                            | 3.13<br>0.39 µg/ml               | [514] |
| <i>Malva sylvestris</i>  | Flowers | Silver nitrate 50 mM/<br>plant extract 15 %<br>(1:18 v/v)<br>25°C<br>4 h<br>pH NM                         | Spherical<br>20–40 nm                        | Diffusion<br>37°C<br>24 h<br>pH NM<br>Inoculum size NM<br>No control         | <i>E. coli</i><br><i>S. aureus</i><br><i>S. pyogenes</i>                                                                          | 10<br>9<br>9 mm                  | [515] |
| <i>Salvadora persica</i> | Roots   | Silver nitrate 0.5 mM/<br>plant extract 10 %<br>(49:1 v/v)<br>90°C<br>2 h<br>pH NM                        | Spherical<br>10–20 nm                        | Diffusion<br>37°C<br>24 h<br>pH NM<br>1×10 <sup>5</sup> CFU/ml<br>No control | <i>E. coli</i><br><i>P. aeruginosa</i><br><i>S. aureus</i><br><i>Micrococcus luteus</i>                                           | 13<br>11<br>15<br>14 mm          | [516] |

|                            |         |                                                                                     |                                               |                                                                                       |                                                                                                                                                |                            |       |
|----------------------------|---------|-------------------------------------------------------------------------------------|-----------------------------------------------|---------------------------------------------------------------------------------------|------------------------------------------------------------------------------------------------------------------------------------------------|----------------------------|-------|
| <i>Costus afer</i>         | Leaves  | Silver nitrate 1 mM/<br>plant extract 1.3 %<br>(5:1 v/v)<br>90°C<br>2 h<br>pH NM    | Spherical<br>20 nm                            | Diffusion<br>37°C<br>24 h<br>pH NM<br>Inoculum NM<br>Gentamycin**                     | <i>S. aureus</i><br><i>E. coli</i><br><i>P. aeruginosa</i><br><i>K. pneumoniae</i>                                                             | 23<br>21<br>18<br>14 mm    | [517] |
| <i>Phoenix dactylifera</i> | Fruits  | Silver nitrate 1 mM/<br>plant extract 10 % (9:1<br>v/v)<br>25°C<br>48 h<br>pH NM    | Spherical<br>20–60 nm                         | Diffusion<br>37°C<br>18–24h<br>pH NM<br>2.5×10 <sup>5</sup> CFU/ml<br>Ciprofloxacin** | <i>S. aureus</i><br><i>P. aeruginosa</i><br><i>E. coli</i>                                                                                     | 18<br>12<br>15 mm          | [518] |
| <i>Madhuca longifolia</i>  | Flowers | Silver nitrate 1 mM/<br>plant extract 10 %<br>(10:1 v/v)<br>40°C<br>20 min<br>pH NM | Spherical and<br>oval<br>30–50 nm             | Dilution<br>37°C<br>24 h<br>pH NM<br>1×10 <sup>8</sup> CFU/ml<br>No control           | <i>E. coli</i> KCTC 1682<br><i>S. typhimurium</i> KCCM 11862<br><i>B. cerues</i> ATCC13061<br><i>Staphylococcus saprophyticus</i><br>KCTC 3345 | 90<br>80<br>60<br>40 µg/ml | [519] |
| <i>Saussurea lappa</i>     | Roots   | Silver nitrate 5 mM/<br>plant extract 10 %<br>(1:1 v/v)<br>37°C<br>24 h<br>pH NM    | Spherical<br>20.2 nm                          | Diffusion<br>30°C<br>24 h<br>pH NM<br>Inoculum size NM<br>No control                  | <i>E. coli</i><br><i>P. aeruginosa</i>                                                                                                         | 11<br>9 mm                 | [520] |
| <i>Jurinea dolomiaea</i>   | Roots   | Silver nitrate 5 mM /<br>plant extract 20 %<br>(1:1 v/v)<br>37°C<br>24 h<br>pH NM   | Spherical, cubic<br>and triangular<br>24.6 nm | Diffusion<br>35°C<br>24 h<br>pH NM<br>Inoculum NM<br>No control                       | <i>P. aeruginosa</i><br><i>E. coli</i>                                                                                                         | 11<br>11 mm                | [521] |

|                               |        |                                                                                    |                           |                                                                                |                                                                                                                                             |                              |       |
|-------------------------------|--------|------------------------------------------------------------------------------------|---------------------------|--------------------------------------------------------------------------------|---------------------------------------------------------------------------------------------------------------------------------------------|------------------------------|-------|
| <i>Gardenia jasminoides</i>   | Seeds  | Silver nitrate 3 mM/<br>plant extract 5 % (9:1<br>v/v)<br>25°C<br>24 h<br>pH NM    | Spherical<br>20 nm        | Dilution<br>37°C<br>24 h<br>pH NM<br>1×10 <sup>9</sup> CFU/ml<br>No control    | <i>S. aureus</i> ATCC13150<br><i>S. typhimurium</i> ATCC14028                                                                               | 7.5<br>10 µg/ml              | [522] |
| <i>Stachys lavandulifolia</i> | Leaves | Silver nitrate 8 mM/<br>plant extract 10 %<br>(2:1 v/v)<br>25°C<br>2 h<br>pH NM    | Spherical<br>20–40 nm     | Dilution<br>37°C<br>24 h<br>pH NM<br>Inoculum NM<br>Tetracycline**             | <i>E. coli</i> ATCC 1103<br><i>S. aureus</i> ATCC9144                                                                                       | 43<br>16 µg/ml               | [523] |
| <i>Cocos nucifera</i>         | Nuts   | Silver nitrate 1 mM/<br>plant extract 10 %<br>(10:1 v/v)<br>25°C<br>1 h<br>pH NM   | Spherical<br>14.2–22.9 nm | Diffusion<br>37°C<br>24 h<br>pH NM<br>1×10 <sup>8</sup> CFU/ml<br>Ampicillin** | <i>S. aureus</i> ATCC 25923<br><i>E. coli</i> ATCC 25922<br><i>S. typhimurium</i> ATCC 13311<br><i>Listeria monocytogenes</i> ATCC<br>19111 | 26<br>53<br>106<br>212 µg/ml | [524] |
| <i>Tridax procumbens</i>      | Leaves | Silver nitrate 1 mM /<br>plant extract 10 %<br>(20:1 v/v)<br>25°C<br>48 h<br>pH NM | Spherical<br>20–50 nm     | Diffusion<br>37 °C<br>24 h<br>pH NM<br>Inoculum NM<br>No control               | <i>S. aureus</i><br><i>E. coli</i><br><i>P. aeruginosa</i><br><i>S. epidermidis</i>                                                         | 10<br>14<br>8<br>10 mm       | [525] |
| <i>Reinwardtia indica</i>     | Leaves | Silver nitrate 1 mM/<br>plant extract 14 % (9:1<br>v/v)<br>38°C<br>48 h<br>pH 7    | Spherical<br>3–15nm       | Diffusion<br>37°C<br>24 h<br>pH NM<br>1×10 <sup>8</sup> CFU/ml<br>No control   | <i>E. coli</i> ATCC 25922<br><i>S. aureus</i> ATCC 25923<br><i>P. aeruginosa</i> ATCC 27853                                                 | 13<br>15<br>16 mm            | [526] |

|                                 |         |                                                                                                         |                             |                                                                                            |                                                                                                                                                                 |                                    |       |
|---------------------------------|---------|---------------------------------------------------------------------------------------------------------|-----------------------------|--------------------------------------------------------------------------------------------|-----------------------------------------------------------------------------------------------------------------------------------------------------------------|------------------------------------|-------|
|                                 |         |                                                                                                         |                             | Diffusion<br>25°C<br>Incubation time NM<br>pH NM<br>1×10 <sup>6</sup> CFU/ml<br>No control | <i>C. albicans</i> ATCC 90028                                                                                                                                   | 14 mm                              |       |
| <i>Bergenia ciliata</i>         | Rhizome | Silver nitrate 1 mM/<br>plant extract 5 % (1:4<br>v/v)<br>100°C<br>Incubation time NM<br>pH NM          | Spherical<br>35 nm          | Diffusion<br>37°C<br>24 h<br>pH NM<br>Inoculum NM<br>Chloramphenicol 10<br>µg/ml           | <i>E. coli</i><br><i>K. pneumoniae</i><br><i>P. aeruginosa</i><br><i>S. epidermidis</i><br><i>Serratia marcescens</i><br><i>S. aureus</i><br><i>S. pyogenes</i> | 8<br>8<br>8<br>8<br>7<br>8<br>6 mm | [527] |
| <i>Citrus sinensis</i>          | Peels   | Silver nitrate 1 mM/<br>plant extract 6.25 %<br>(1:1 v/v)<br>Temperature NM<br>2 h<br>pH NM             | Spherical<br>48.1 ± 20.5 nm | Dilution<br>35°C<br>24 h<br>pH NM<br>1×10 <sup>8</sup> CFU/ml<br>Ampicillin 50 µg/ml       | <i>Xanthomonas axonopodis</i>                                                                                                                                   | 22 µg/ml                           | [528] |
| <i>Stereospermum suaveolens</i> | Roots   | Silver nitrate 1 mM/<br>plant extract 5 % (9:1<br>v/v)<br>Temperature NM<br>Incubation time NM<br>pH NM | Spherical<br>27.2 ± 5.9 nm  | Diffusion<br>37°C<br>Incubation time NM<br>pH NM<br>Inoculum NM<br>No control              | <i>B. subtilis</i> MTCC 441<br><i>S. aureus</i> MTCC 96<br><i>E. coli</i> MTCC 443<br><i>P. aeruginosa</i> MTCC 424                                             | 14<br>16<br>17<br>20 mm            | [529] |
|                                 |         |                                                                                                         |                             | Diffusion<br>Temperature NM<br>Incubation time NM<br>pH NM<br>Inoculum NM<br>No control    | <i>Aspergillus nidulans</i> MTCC 344<br><i>A. flavus</i> MTCC 277                                                                                               | 11<br>12 mm                        |       |



|                            |                |                                                                                                |                                                      |                                                                                  |                                                                                                                                         |                                |       |
|----------------------------|----------------|------------------------------------------------------------------------------------------------|------------------------------------------------------|----------------------------------------------------------------------------------|-----------------------------------------------------------------------------------------------------------------------------------------|--------------------------------|-------|
| <i>Wedelia chinensis</i>   | Leaves         | Silver nitrate 1 mM/<br>plant extract 10 % (9:1<br>v/v)<br>60°C<br>Incubation time NM<br>pH NM | Spherical<br>18–68.8 nm                              | Diffusion<br>37°C<br>24 h<br>pH NM<br>Inoculum NM<br>Ampicillin**                | <i>E. coli</i><br><i>Listeria monocytogenes</i>                                                                                         | 17<br>12 mm                    | [530] |
| <i>Allium sativum</i>      | Bulb           | Silver nitrate 1 mM/<br>plant extract 20 % (3:1<br>v/v)<br>Room temperature<br>15 min<br>pH NM | Spherical<br>3–6 nm                                  | Dilution<br>37°C<br>24 h<br>pH NM<br>1×10 <sup>5</sup> CFU/ml<br>Ciprofloxacin** | <i>Streptococcus faecalis</i> ATCC<br>29212<br><i>B. cereus</i> ATCC 10702<br><i>E. coli</i> ATCC 25922<br><i>Shigella flexneri</i> KZN | 125<br>125<br>125 µg/ml        | [531] |
| <i>Zingiber officinale</i> | Rhizome        |                                                                                                | Spherical<br>3–22 nm                                 |                                                                                  | <i>Streptococcus faecalis</i> ATCC<br>29212<br><i>B. cereus</i> ATCC 10702<br><i>E. coli</i> ATCC 25922<br><i>Shigella flexneri</i> KZN | 25<br>25<br>25<br>25 µg/ml     |       |
| <i>Capsicum frutescens</i> | Fruits         |                                                                                                | Spherical<br>3–18 nm                                 |                                                                                  | <i>Streptococcus faecalis</i> ATCC<br>29212<br><i>B. cereus</i> ATCC 10702<br><i>E. coli</i> ATCC 25922<br><i>Shigella flexneri</i> KZN | 125<br>125<br>125<br>125 µg/ml |       |
| <i>Brassica oleracea</i>   | Whole<br>plant | Silver nitrate 0.9 mM/<br>plant extract 20 %<br>(9 :1 v/v)<br>40 °C<br>2 h<br>pH 10            | Spherical<br>4–18 nm                                 | Diffusion<br>37°C<br>24 h<br>pH NM<br>Inoculum NM<br>Erythromycin 1.5 µg/ml      | <i>E. coli</i><br><i>P. aeruginosa</i><br><i>Kocuria myroides</i><br><i>Promicromonospora</i>                                           | 9<br>7<br>12<br>6 mm           | [532] |
| <i>Borago officinalis</i>  | Leaves         | Silver nitrate 1 mM/<br>plant extract 10 %<br>(4:1 v/v)<br>65 °C<br>30 min                     | Spherical,<br>hexagonal and<br>irregular<br>30–80 nm | Diffusion<br>28°C<br>24 h<br>pH NM<br>1×10 <sup>6</sup> CFU/ml                   | <i>P. aeruginosa</i><br><i>E. coli</i><br><i>S. aureus</i><br><i>Vibrio parahaemolyticus</i>                                            | 14<br>11<br>13<br>13 mm        | [533] |

|                            |           |                                                                                   |                                      |                                                                                               |                                                                                     |                         |       |
|----------------------------|-----------|-----------------------------------------------------------------------------------|--------------------------------------|-----------------------------------------------------------------------------------------------|-------------------------------------------------------------------------------------|-------------------------|-------|
|                            |           | pH NM                                                                             |                                      | No control                                                                                    |                                                                                     |                         |       |
| <i>Phoenix dactylifera</i> | Seeds     | Silver nitrate 1 mM/<br>plant extract 10 %<br>(9:1 v/v)<br>37 °C<br>48 h<br>pH NM | Spherical<br>14–30 nm                | Diffusion<br>37°C<br>24 h<br>pH NM<br>Inoculum NM<br>No control                               | MRSA ATCC 43300                                                                     | 24 mm                   | [534] |
| <i>Zea mays</i>            | Leaves    | Silver nitrate 1 mM/<br>plant extract 10 %<br>(4:1v/v)<br>37°C<br>40 min<br>pH NM | Spherical<br>12.6 nm                 | Dilution<br>37°C<br>24 h<br>pH NM<br>1×10 <sup>8</sup> CFU/ml<br>No control                   | <i>S. aureus</i> ATCC 29213<br><i>E. coli</i> ATCC 25922                            | 0.337<br>0.084 µg/ml    | [535] |
|                            |           |                                                                                   |                                      | Dilution<br>37°C<br>Incubation time NM<br>pH NM<br>1.5×10 <sup>8</sup> CFU/ml<br>Fluconazol** | <i>C. albicans</i>                                                                  | 0.021 µg/ml             |       |
| <i>Tirmania sp.</i>        | Ascocarps | Silver nitrate 1 mM/<br>plant extract 5 % (1:2<br>v/v)<br>30°C<br>72 h<br>pH NM   | Spherical or<br>irregular<br>3–15 nm | Diffusion<br>37°C<br>24 h<br>pH NM<br>Inoculum size NM<br>Gentamycin**<br>25 µg/ml            | <i>E. coli</i><br><i>P. aeruginosa</i><br><i>Klebsiella spp</i><br><i>S. aureus</i> | 26<br>28<br>25<br>22 mm | [536] |
| <i>Ulmus wallichiana</i>   | Leaves    | Silver nitrate 1 mM /<br>plant extract 10 % (4:1<br>v/v)<br>37°C                  | Spherical<br>54 nm                   | Diffusion<br>37°C<br>24 h<br>pH NM                                                            | <i>S. aureus</i><br><i>E. coli</i><br><i>P. aeruginosa</i><br><i>K. pneumoniae</i>  | 17<br>18<br>18<br>15 mm | [537] |

|                           |            |                                                                                  |                                       |                                                                                            |                                                                                                                                                                                                                                  |                                                 |       |
|---------------------------|------------|----------------------------------------------------------------------------------|---------------------------------------|--------------------------------------------------------------------------------------------|----------------------------------------------------------------------------------------------------------------------------------------------------------------------------------------------------------------------------------|-------------------------------------------------|-------|
|                           |            | 24 h<br>NM                                                                       |                                       | Inoculum size NM<br>Ampicillin 100 µg/ml                                                   |                                                                                                                                                                                                                                  |                                                 |       |
| <i>Garcinia indica</i>    | Fruits     | Silver nitrate 2 mM/<br>plant extract 10 % (1:1<br>v/v)<br>70°C<br>24 h<br>pH 10 | Spherical and<br>hexagonal<br>5–30 nm | Diffusion<br>37°C<br>24 h<br>pH NM<br>Inoculum NM<br>Tetracyclin 10 µg/ml                  | <i>E. coli</i><br><i>B. subtilis</i><br><i>S. aureus</i><br><i>P. aeruginosa</i><br><i>S. typhi</i><br><i>P. vulgaris</i><br><i>Serratia marcescens</i>                                                                          | 14<br>12<br>15<br>12<br>0<br>0<br>0 mm          | [538] |
| <i>Swertia paniculata</i> | Arial part | Silver nitrate 1 mM /<br>plant extract 5 % (1:1<br>v/v)<br>40°C<br>24 h<br>pH 7  | Spherical<br>31–44 nm                 | Diffusion<br>37°C<br>24 h<br>pH 7<br>10 <sup>5</sup> –10 <sup>6</sup> CFU/ml<br>No control | <i>S. aureus</i><br><i>K. pneumoniae</i><br><i>P. aeruginosa</i>                                                                                                                                                                 | 15<br>18<br>19 mm                               | [539] |
| <i>Prunus cerasifera</i>  | Fruits     | Silver nitrate 1 mM/<br>plant extract 10 % (5:1<br>v/v)<br>80°C<br>2 h<br>NM     | Spherical<br>2 nm                     | Diffusion<br>37°C<br>24 h<br>pH NM<br>Inoculum size NM<br>Ampicillin**                     | <i>Xanthomonas axonopodus</i><br><i>Pseudomonas syringae</i>                                                                                                                                                                     | 21<br>19                                        | [540] |
|                           |            |                                                                                  |                                       | Diffusion<br>Temperature NM<br>72 h<br>pH NM<br>Inoculum size NM<br>Amphotericin B**       | <i>A. niger</i><br><i>A. flavus</i><br><i>Aspergillus spergillus</i><br><i>Aspergillus fumigatus</i><br><i>Aspergillus terreus</i><br><i>Penicillium chrysogenum</i><br><i>Fusarium solani</i><br><i>Lasiodiplodia heobromae</i> | 20<br>26<br>18<br>14<br>24<br>23<br>21<br>22 mm |       |

|                             |                     |                                                                                                          |                             |                                                                                                 |                                                                                                                             |                           |       |
|-----------------------------|---------------------|----------------------------------------------------------------------------------------------------------|-----------------------------|-------------------------------------------------------------------------------------------------|-----------------------------------------------------------------------------------------------------------------------------|---------------------------|-------|
| <i>Thymbra spicata</i>      | Leaves              | Silver nitrate 1 mM/<br>plant extract 10 %<br>(10:1 v/v)<br>60°C<br>12 h<br>pH NM                        | Spherical<br>20–50 nm       | Diffusion<br>35°C<br>24 h<br>pH NM<br>1×10 <sup>5</sup> –10 <sup>6</sup> CFU/ml<br>Gentamycin** | <i>B. cereus</i> ATCC 11778<br><i>S. aureus</i> ATCC 25923<br><i>E. coli</i> ATCC 25922<br><i>S. typhimurium</i> ATCC 14028 | 15<br>16<br>12<br>14 mm   | [541] |
| <i>Sida acuta</i>           | Leaves and<br>stems | Silver nitrate 1 mM/<br>plant extract 10 % (9:2<br>v/v)<br>Temperature NM<br>Incubation time NM<br>pH NM | Spherical<br>5–30 nm        | Diffusion<br>Temperature NM<br>Incubation time NM<br>pH NM<br>Inoculum NM<br>Gentamycin**       | <i>S. aureus</i><br><i>Streptococcus faecalis</i><br><i>E. coli</i>                                                         | 9<br>0<br>11 mm           | [542] |
| <i>Ocimum Sanctum</i>       | Leaves              | Silver nitrate 2 mM /<br>plant extract 5 % (2:1<br>v/v)<br>60°C<br>10 min<br>pH 10                       | Spherical<br>18 nm          | Diffusion<br>35°C<br>48 h<br>pH NM<br>Inoculum NM<br>No control                                 | <i>E. coli</i>                                                                                                              | 14 mm                     | [543] |
| <i>Desmodium adscendens</i> | Whole<br>plant      | Silver nitrate 1 mM /<br>plant extract 5 % (1:1<br>v/v)<br>37°C<br>5 h<br>pH NM                          | Spherical<br>15–100 nm      | Dilution<br>37°C<br>24 h<br>pH NM<br>1×10 <sup>6</sup> CFU/ml<br>Ciprofloxacin 10 µg /ml        | <i>E. coli</i> ATCC 25922<br><i>S. aureus</i> ATCC 25923<br><i>B. cereus</i> ATCC 11778                                     | 31.3<br>7.8<br>12.5 µg/ml | [544] |
| <i>Cyperus rotundus</i>     | Weeds               | Silver nitrate 15 mM/<br>plant extract 9 % (1 :1<br>v/v)<br>37°C<br>24 h<br>pH NM                        | Spherical<br>20.5 ± 9.6 nm  | Diffusion<br>37°C<br>24 h<br>pH NM<br>5×10 <sup>5</sup> CFU/ml<br>No control                    | <i>Chromobacterium</i><br><i>haemolyticum</i><br><i>E. coli</i><br><i>B. cereus</i>                                         | 15<br>8<br>10 mm          | [545] |
| <i>Eleusin indica</i>       |                     |                                                                                                          | Spherical<br>55.0 ± 24.1 nm |                                                                                                 | <i>Chromobacterium</i><br><i>haemolyticum</i><br><i>E. coli</i>                                                             | 9<br>12                   |       |

|                           |            |                                                                                              |                                   |                                                                                         |                                                                                                                                                                                                                                     |                                     |       |
|---------------------------|------------|----------------------------------------------------------------------------------------------|-----------------------------------|-----------------------------------------------------------------------------------------|-------------------------------------------------------------------------------------------------------------------------------------------------------------------------------------------------------------------------------------|-------------------------------------|-------|
|                           |            |                                                                                              |                                   |                                                                                         | <i>B. cereus</i>                                                                                                                                                                                                                    | 10 mm                               |       |
| <i>Punica granatum</i>    | Peels      | Silver nitrate 1 mM/<br>plant extract 10 % (1:1<br>v/v)<br>60°C<br>3 h<br>pH NM              | Spherical<br>3–13 nm              | Diffusion<br>Temperature NM<br>Incubation time NM<br>pH NM<br>Inoculum NM<br>No control | <i>S. aureus</i><br><i>P. aeruginosa</i><br><i>Micrococcus leutus</i><br><i>Bordetella bronchiseptica</i>                                                                                                                           | 11<br>10<br>10<br>11 mm             | [546] |
| <i>Ardisia solanacea</i>  | Leaves     | Silver nitrate 1 mM/<br>plant extract 10 % (9:1<br>v/v)<br>60°C<br>12 h<br>pH NM             | Polyhedral<br>29 nm               | Diffusion<br>37°C<br>24 h<br>pH NM<br>Inoculum NM<br>Gentamycin**                       | <i>B. subtilis</i> MTCC 736<br><i>S. aureus</i> MTCC 737<br><i>E. coli</i> MTCC 443<br><i>P. aeruginosa</i> MTCC 424                                                                                                                | 16<br>0<br>0<br>28 mm               | [547] |
| <i>Agrimonia pilosa</i>   | Arial part | Silver nitrate 1 mM/<br>plant extract 10 %<br>(10:1 v/v)<br>40°C<br>10 min<br>pH NM          | Spherical and<br>oval<br>10–20 nm | Diffusion<br>37°C<br>24 h<br>pH NM<br>Inoculum NM<br>No control                         | <i>B. cereus</i> ATCC 130601<br><i>S. aureus</i> ATCC 6538<br><i>E. coli</i> KCTC 1635<br><i>Pseudomonas putida</i> ATCC<br>49128<br><i>Listeria monovytogenes</i> ATCC<br>7644<br><i>Staphylococcus saprophyticus</i><br>KCTC 1682 | 14<br>15<br>15<br>15<br>16<br>17 mm | [548] |
| <i>Limonia acidissima</i> | Leaves     | Silver nitrate 5 mM/<br>plant extract 10 % (1:1<br>v/v)<br>Room temperature<br>24 h<br>pH NM | Spherical<br>21–42 nm             | Diffusion<br>37°C<br>24 h<br>pH NM<br>1×10 <sup>6</sup> CFU/ml<br>Erythromycin 15 µg    | <i>S. aureus</i> MTCC 3160<br><i>B. cereus</i> MTCC 8733<br><i>Enterococcus faecalis</i> ATCC<br>35550<br><i>E. coli</i> MTCC 433<br><i>S. typhi</i> MTCC 3216<br><i>P. aeruginosa</i> ATCC 25619                                   | 16<br>16<br>15<br>18<br>9<br>9 mm   | [549] |
| <i>Lantana camara</i>     | Leaves     | Silver nitrate 1 mM/<br>plant extract 33 % (6:1<br>v/v)                                      | Spherical<br>42.5 nm              | Diffusion<br>37°C<br>24 h                                                               | <i>S. aureus</i> MTCC 87<br><i>P. aeruginosa</i> MTCC 741<br><i>E. coli</i> MTCC 443                                                                                                                                                | 28<br>21<br>22 mm                   | [550] |

|                             |                |                                                                                                |                                              |                                                                                           |                                                                                                                                                                                                     |                                          |       |
|-----------------------------|----------------|------------------------------------------------------------------------------------------------|----------------------------------------------|-------------------------------------------------------------------------------------------|-----------------------------------------------------------------------------------------------------------------------------------------------------------------------------------------------------|------------------------------------------|-------|
|                             |                | 37°C<br>24 h<br>pH NM                                                                          |                                              | pH NM<br>Inoculum NM<br>Ciprofloxacin**                                                   |                                                                                                                                                                                                     |                                          |       |
| <i>Euphorbia cf. lactea</i> | Latex          | Silver nitrate 10 mM/<br>plant extract 0.2 %<br>(19:1 v/v)<br>Room temperature<br>3 h<br>pH NM | Pseudospherical<br>and cubic<br>57 ± 14.7 nm | Dilution<br>37°C<br>24 h<br>pH NM<br>1×10 <sup>4</sup> CFU/ml<br>No control               | <i>S. aureus</i> TISTR 1466<br>MRSA DMST 20654<br><i>B. cereus</i> TISTR 687<br><i>E. coli</i> TISTR 780<br><i>P. aeruginosa</i> TISTR781                                                           | 6.25<br>25<br>6.25<br>12.5<br>12.5 µg/ml | [551] |
| <i>Sterculia foetida</i>    | Leaves         | Silver nitrate 1 mM/<br>plant extract 4 % (1:9<br>v/v)<br>Temperature NM<br>48 h<br>pH NM      | Spherical<br>50–70 nm                        | Diffusion<br>Temperature NM<br>Incubation time NM<br>pH NM<br>Inoculum NM<br>Gentamycin** | <i>S. aureus</i><br><i>B. cereus</i><br><i>E. coli</i><br><i>P. aeruginosa</i>                                                                                                                      | 19<br>11<br>13<br>20 mm                  | [552] |
| <i>Ziziphus jujuba</i>      | Whole<br>plant | Silver nitrate 10 mM/<br>plant extract 3 % (1:4<br>v/v)<br>60°C<br>30 min<br>pH 4.85           | Spherical<br>11.5 ± 4. 8 nm                  | Diffusion<br>37°C<br>24 h<br>pH NM<br>Inoculum NM<br>Gentamycin**                         | <i>S. aureus</i><br><i>E. coli</i>                                                                                                                                                                  | 8<br>6 mm                                | [553] |
| <i>Rumex hymenosepalus</i>  | Roots          | Silver nitrate 10 mM/<br>plant extract 15 %<br>(1 :1 v/v)<br>25°C<br>24 h<br>pH NM             | Spherical<br>10 nm                           | Diffusion<br>37°C<br>24 h<br>pH NM<br>1.5×10 <sup>8</sup> CFU/ml<br>No control            | <i>S. aureus</i> ATCC 25923<br><i>Listeria monocytogenes</i> ATCC<br>7644<br><i>E. coli</i> ATCC 11229<br><i>E. coli</i> ATCC 43895<br><i>S. typhi</i> ATCC 6539<br><i>P. aeruginosa</i> ATCC 15442 | 20<br>18<br>11<br>17<br>17<br>16 mm      | [554] |
|                             |                |                                                                                                |                                              | Diffusion<br>37°C<br>24 h<br>pH NM                                                        | <i>C. albicans</i> ATCC 90028                                                                                                                                                                       | 24 mm                                    |       |

|                              |        |                                                                                                          |                       |                                                                                       |                                                                                                                                                                                                     |                                     |       |
|------------------------------|--------|----------------------------------------------------------------------------------------------------------|-----------------------|---------------------------------------------------------------------------------------|-----------------------------------------------------------------------------------------------------------------------------------------------------------------------------------------------------|-------------------------------------|-------|
|                              |        |                                                                                                          |                       | 1.5×10 <sup>8</sup> CFU/ml<br>No control                                              |                                                                                                                                                                                                     |                                     |       |
| <i>Heterotheca inuloides</i> | Leaves | Silver nitrate 10 mM/<br>plant extract 1 % (4 :1<br>v/v)<br>37°C<br>8 h<br>pH NM                         | Spherical<br>17 nm    | Diffusion<br>37°C<br>24 h<br>pH NM<br>1×10 <sup>8</sup> CFU/ml<br>No control          | <i>S. aureus</i><br><i>E. coli</i><br><i>Lactobacillus casei</i><br><i>Streptococcus mutans</i>                                                                                                     | 3<br>2<br>5<br>7 mm                 | [555] |
| <i>Citrus maxima</i>         | Leaves | Silver nitrate 1 mM/<br>plant extract 10 %<br>(20:1 v/v)<br>Temperature NM<br>4–6 h<br>pH NM             | Spherical<br>2–50 nm  | Diffusion<br>37°C<br>24 h<br>pH NM<br>1×10 <sup>6</sup> CFU/ml<br>Gentamycin 10 µg/ml | <i>E. coli</i> MG 1655<br><i>B. cereus</i> MTCC 430<br><i>B. subtilis</i> MTCC 121<br><i>K. pneumoniae</i> MTCC 3384<br><i>P. aeruginosa</i> MTCC 741<br><i>S. aureus</i> MTCC 740                  | 14<br>11<br>12<br>11<br>12<br>12 mm | [556] |
| <i>Melissa officinalis</i>   | Leaves | Silver nitrate 1 mM/<br>plant extract 14 % (4:1<br>v/v)<br>Temperature NM<br>Incubation time NM<br>pH NM | Spherical<br>13 nm    | Diffusion<br>37°C<br>24h<br>pH NM<br>1.5×10 <sup>8</sup> CFU/ml<br>No control         | <i>S. aureus</i> ATCC 25923<br><i>B. cereus</i> B1079<br><i>P. aeruginosa</i> ATCC 27853<br><i>E. coli</i> ATCC 25922                                                                               | 12<br>20<br>12<br>15 mm             | [557] |
|                              |        |                                                                                                          |                       | Diffusion<br>37°C<br>24–48 h<br>pH NM<br>1.5×10 <sup>8</sup> CFU/ml<br>No control     | <i>C. albicans</i> ATCC 10231<br><i>Candida parapsilosis</i> ATCC<br>22109<br><i>Candida glabrata</i> ATCC 64677<br><i>Candida krusei</i> ATCC 1424<br><i>A. niger</i><br><i>Trichoderma viride</i> | 11<br>10<br>0<br>7<br>0<br>0 mm     |       |
| <i>Elephantopus scaber</i>   | Leaves | Silver nitrate 1 mM /<br>plant extract 5 % (9:1<br>v/v)<br>Temperature NM<br>Incubation time NM          | Spherical<br>20–60 nm | Diffusion<br>37°C<br>24 h<br>pH NM<br>Inoculum NM                                     | <i>B. subtilis</i> MTCC 441<br><i>Lactococcus lactis</i> MTCC 3041<br><i>P. aeruginosa</i> MTCC 424<br><i>Pseudomonas fluorescens</i><br>MTCC 2421                                                  | 10<br>6<br>6<br>5 mm                | [558] |

|                             |                                                |                                                                                                            |                                         |                                                                                    |                                                                                           |                   |       |
|-----------------------------|------------------------------------------------|------------------------------------------------------------------------------------------------------------|-----------------------------------------|------------------------------------------------------------------------------------|-------------------------------------------------------------------------------------------|-------------------|-------|
|                             |                                                | pH NM                                                                                                      |                                         | Streptomycin**                                                                     |                                                                                           |                   |       |
| <i>Artemisia quttensis</i>  | Aerial part                                    | Silver nitrate 1 mM/<br>plant extract 10 %<br>(1:15 v/v)<br>Temperature NM<br>Incubation time NM<br>pH NM  | Spherical<br>10.9 ± 8.1 nm              | Diffusion<br>37°C<br>24 h<br>pH NM<br>1×10 <sup>8</sup> CFU/ml<br>Ampicillin**     | <i>S. aureus</i> ATCC 6538<br><i>P. aeruginosa</i> ATCC 15442<br><i>E. coli</i> ATCC 6633 | 14<br>7<br>10 mm  | [559] |
| <i>Cucurbita maxima</i>     | Fruit Pulp,<br>Seeds,<br>Flowers<br>and Callus | Silver nitrate 1 mM/<br>plant extract 5 % (9:1<br>v/v)<br>60°C<br>Incubation time NM<br>pH NM              | Spherical<br>7.3–15.6 nm                | Diffusion<br>37°C<br>24 h<br>pH NM<br>Inoculum NM<br>Ciprofloxacin 10 µg           | <i>E. coli</i>                                                                            | 14 mm             | [560] |
| <i>Corchorus capsularis</i> | Leaves                                         | Silver nitrate 1 mM/<br>plant extract 2 % (1 :1<br>v/v)<br>NM<br>10 min<br>pH NM                           | Spherical and<br>ellipsoidal<br>20.5 nm | Diffusion<br>37°C<br>24 h<br>pH NM<br>1×10 <sup>6</sup> CFU/ml<br>Gentamycin 15 µg | <i>P. aeruginosa</i><br><i>S. aureus</i>                                                  | 21<br>15 mm       | [561] |
| <i>Mentha pulegium</i>      | NM                                             | Silver nitrate 10 mM/<br>plant extract 4 % (1:4<br>v/v)<br>Room temperature<br>Incubation time NM<br>pH NM | Anisotropic<br>5–50 nm                  | Diffusion<br>37°C<br>24 h<br>pH NM<br>1×10 <sup>5</sup> CFU/ml<br>Ampicillin 10 µg | <i>E. coli</i> ATCC 25922<br><i>S. aureus</i> ATCC 25923<br><i>S. pyogenes</i> ATCC 1447  | 10<br>11<br>10 mm | [562] |



|                                  |        |                                                                                     |                       |                                                                                        |                                                                                                                                                                                                                                                                              |                                                       |       |
|----------------------------------|--------|-------------------------------------------------------------------------------------|-----------------------|----------------------------------------------------------------------------------------|------------------------------------------------------------------------------------------------------------------------------------------------------------------------------------------------------------------------------------------------------------------------------|-------------------------------------------------------|-------|
| <i>Diospyros sylvatica</i>       | Roots  | Silver nitrate 1 mM/<br>plant extract** (5 :1<br>v/v)<br>60°C<br>3 h<br>pH NM       | Spherical<br>10–40 nm | Diffusion<br>37°C<br>18 h<br>pH NM<br>Inoculum size NM<br>Chloramphenicol 100<br>µg/ml | <i>B. subtilis</i> MTCC 441<br><i>Bacillus pumilis</i> MTCC 432<br><i>S. pyogenes</i> MTCC 2327<br><i>P. aeruginosa</i> MTCC 424<br><i>S. aureus</i> MTCC 3160<br><i>E. coli</i> MTCC 443<br><i>K. pneumoniae</i> MTCC 452<br><i>P. vulgaris</i> MTCC 426                    | 19<br>23<br>19<br>16<br>16<br>13<br>15<br>20 mm       | [300] |
|                                  |        |                                                                                     |                       | Diffusion<br>37°C<br>48 h<br>pH NM<br>Inoculum size NM<br>Nystatin 100 µg/ml           | <i>A. niger</i> MTCC 961<br><i>A. flavus</i> MTCC 149<br><i>Penicillium notatum</i> MTCC 722<br><i>Saccharomyces cerevisiae</i><br>MTCC 783                                                                                                                                  | 15<br>12<br>13<br>15 mm                               |       |
| <i>Trigonella foenum graecum</i> | Leaves | Silver nitrate 1 mM /<br>plant extract 2.5 %<br>(49:1 v/v)<br>37°C<br>24 h<br>pH NM | Spherical<br>2–15 nm  | Diffusion<br>37°C<br>24 h<br>pH 7.3<br>Inoculum NM<br>Ciproflaxacin**                  | <i>Enterococcus faecalis</i><br><i>S. aureus</i><br><i>Acinetobacter baumannii</i><br><i>Enterobacter asburiae</i><br><i>Enterobacter cloacae</i><br><i>Enterobacter kobei</i><br><i>E. coli</i><br><i>K. pneumoniae</i><br><i>Proteus mirabilis</i><br><i>P. aeruginosa</i> | 9<br>10<br>8<br>10<br>10<br>9<br>10<br>8<br>9<br>7 mm | [563] |
| <i>Catharanthus roseus</i>       | Callus | Silver nitrate 1 mM/<br>plant extract 10 % (1:1<br>v/v)<br>25°C<br>96 h<br>pH NM    | Spherical<br>2–15 nm  | Diffusion<br>37°C<br>24 h<br>pH NM<br>Inoculum NM<br>No control                        | <i>E. coli</i> ATCC 25922                                                                                                                                                                                                                                                    | 5 mm                                                  | [564] |

|                                  |        |                                                                                              |                         |                                                                                                 |                                                                                                                           |                               |       |
|----------------------------------|--------|----------------------------------------------------------------------------------------------|-------------------------|-------------------------------------------------------------------------------------------------|---------------------------------------------------------------------------------------------------------------------------|-------------------------------|-------|
| <i>Artemisia vulgaris</i>        | Leaves | Silver nitrate 20 mM/<br>plant extract 1 % (1:1<br>v/v)<br>Room temperature<br>2 h<br>pH NM  | Spherical<br>27–53 nm   | Diffusion<br>37°C<br>24 h<br>pH NM<br>10 <sup>5</sup> –10 <sup>6</sup> CFU/ml<br>Gentamycin**   | <i>E. coli</i><br><i>S. aureus</i><br><i>P. aeruginosa</i><br><i>K. pneumoniae</i><br><i>Haemophilus influenza</i>        | 14<br>18<br>14<br>13<br>16 mm | [565] |
| <i>Momordica charantia</i>       | Fruits | Silver nitrate 1 mM/<br>plant extract 20 % (1:3<br>v/v)<br>NM<br>2 h<br>pH NM                | Circular<br>78.5–100 nm | Diffusion<br>37°C<br>24 h<br>pH NM<br>Inoculum NM<br>Ciprofloxacin**                            | <i>S. aureus</i> ATCC 25923<br><i>S. typhi</i> ATCC 14028<br><i>E. coli</i> ATCC 25922<br><i>P. aeruginosa</i> ATCC 27853 | 24<br>7<br>345<br>26 mm       | [566] |
| <i>Trigonella foenum graecum</i> | Leaves | Silver nitrate 1 mM/<br>plant extract 5 % (20:1<br>v/v)<br>35°C<br>96 h<br>pH NM             | Spherical<br>20–30 nm   | Diffusion<br>35°C<br>24 h<br>pH NM<br>Inoculum NM<br>1×10 <sup>5</sup> CFU/ml<br>Streptomycin** | <i>S. aureus</i> ATCC 29736<br><i>E. coli</i> ATCC 8739                                                                   | 12<br>16 mm                   | [567] |
| <i>Syzygium cumini</i>           | Leaves | Silver nitrate 5 mM/<br>plant extract 10 %<br>(10:1 v/v)<br>Room temperature<br>6 h<br>pH NM | Spherical<br>16 ± 2 nm  | Diffusion<br>37°C<br>24 h<br>pH NM<br>1×10 <sup>8</sup> CFU/ml<br>No control                    | <i>S. aureus</i><br><i>P. aeruginosa</i>                                                                                  | 14<br>18 mm                   | [568] |
| <i>Arbutus unedo</i>             | Leaves | Silver nitrate 3 mM /<br>plant extract 10 %<br>(10:1 v/v)<br>80°C<br>0.5 h<br>pH 4.3         | Spherical<br>40–50 nm   | Dilution<br>37°C<br>48 h<br>pH NM<br>5×10 <sup>6</sup> CFU/ml<br>No control                     | <i>S. epidermidis</i> C5M6<br><i>B. subtilis subsp.</i> Bg G11<br><i>E. coli</i> DH5a<br><i>P. aeruginosa</i> ADD1976     | 15<br>3<br>15<br>15 µg/ml     | [569] |
| <i>Carica papaya</i>             | Leaves |                                                                                              | Spherical               | Diffusion                                                                                       | <i>E. coli</i>                                                                                                            | 18                            | [570] |

|                                      |        |                                                                                              |                                         |                                                                                     |                                                                                                                                                                       |                               |       |
|--------------------------------------|--------|----------------------------------------------------------------------------------------------|-----------------------------------------|-------------------------------------------------------------------------------------|-----------------------------------------------------------------------------------------------------------------------------------------------------------------------|-------------------------------|-------|
|                                      |        | Silver nitrate 150 mM/<br>plant extract 3 % (1:1<br>v/v)                                     | 13–69 nm                                | 37°C                                                                                | <i>B. cereus</i>                                                                                                                                                      | 17 mm                         |       |
| <i>Manihot esculenta</i>             |        |                                                                                              | Spherical<br>13–38 nm                   | 24 h<br>pH NM                                                                       | <i>E. coli</i><br><i>B. cereus</i>                                                                                                                                    | 17<br>17 mm                   |       |
| <i>Morinda citrifolia</i>            |        | 37°C<br>24 h<br>pH NM                                                                        | Spherical<br>9–54 nm                    | 5×10 <sup>5</sup> CFU/ml<br>No control                                              | <i>E. coli</i><br><i>B. cereus</i>                                                                                                                                    | 16<br>13 mm                   |       |
| <i>Curcuma aromatica</i>             | Tuber  | Silver nitrate 1 mM/<br>plant extract 20 %<br>(10:1 v/v)<br>37°C<br>24 h<br>pH NM            | Triangular and<br>spherical<br>10–40 nm | Dilution<br>37°C<br>24h<br>pH NM<br>Inoculum NM<br>No control                       | <i>S. aureus</i>                                                                                                                                                      | 1.95 µg/ml                    | [571] |
| <i>Decalepis hamiltonii</i>          | Roots  | Silver nitrate 1 mM/<br>plant extract 10 %<br>(9:1 v/v)<br>37°C<br>24 h<br>pH NM             | Spherical<br>32.5 nm                    | Diffusion<br>37°C<br>24 h<br>pH NM<br>Inoculum NM<br>Norfloxacin**                  | <i>B. cereus</i> MTCC 430<br><i>Bacillus licheniformis</i> MTCC<br>2465<br><i>E. coli</i> MTCC 10312<br><i>S. aureus</i> MTCC 7443<br><i>P. aeruginosa</i> ATCC 27853 | 15<br>13<br>14<br>12<br>17 mm | [572] |
| <i>Cardiospermum<br/>halicacabum</i> | Leaves | Silver nitrate 1 mM/<br>plant extract 10 % (9:1<br>v/v)<br>Room temperature<br>16 h<br>pH NM | Spherical<br>74 nm                      | Diffusion<br>37°C<br>24 h<br>pH NM<br>Inoculum NM<br>Streptomycin**<br>Ampicillin** | <i>P. vulgaris</i> MTCC 426<br><i>P. aeruginosa</i> MTCC 2453<br><i>S. aureus</i> MTCC 96<br><i>B. subtilis</i> MTCC 441<br><i>S. paratyphi</i> MTCC 735              | 15<br>15<br>15<br>16<br>21 mm | [573] |
|                                      |        |                                                                                              |                                         | Diffusion<br>37°C<br>24 h<br>pH NM<br>Inoculum NM<br>Ketoconazol**                  | <i>Alternaria solania</i><br><i>Fusarium porum</i>                                                                                                                    | 8<br>18 mm                    |       |

|                                |        |                                                                                                         |                            |                                                                                     |                                                                                                                                                                                                                                          |                                         |       |
|--------------------------------|--------|---------------------------------------------------------------------------------------------------------|----------------------------|-------------------------------------------------------------------------------------|------------------------------------------------------------------------------------------------------------------------------------------------------------------------------------------------------------------------------------------|-----------------------------------------|-------|
| <i>Malus domestica</i>         | Leaves | Silver nitrate 1 mM/<br>plant extract 50 %<br>(9:1 v/v)<br>80°C<br>16 h<br>pH NM                        | Spherical<br>30.3 ± 5.3 nm | Dilution<br>37°C<br>24 h<br>pH NM<br>5×10 <sup>5</sup> CFU/ml<br>No control         | <i>E. coli</i><br><i>S. aureus</i><br>MRSA<br><i>P. aeruginosa</i>                                                                                                                                                                       | 125<br>1000<br>1000<br>500 µg/ml        | [574] |
| <i>Ziziphus nummularia</i>     | Leaves | Silver nitrate 1 mM/<br>plant extract 5 % (12:1<br>v/v)<br>Room temperature<br>4 h<br>pH NM             | Spherical<br>30–85 nm      | Diffusion<br>37°C<br>24 h<br>pH NM<br>Inoculum NM<br>No control                     | <i>E. coli</i><br><i>P. aeruginosa</i><br><i>S. aureus</i><br><i>S. typhi</i><br><i>B. cereus</i>                                                                                                                                        | 18<br>17<br>18<br>21<br>16 mm           | [575] |
|                                |        |                                                                                                         |                            | Dilution<br>Room temperature<br>96 h<br>8 days<br>Inoculum NM<br>No control         | <i>A. niger</i><br><i>A. flavus</i><br><i>C. albicans</i>                                                                                                                                                                                | 120<br>150<br>95 µg/ml                  |       |
| <i>Pedaliium murex</i>         | Leaves | Silver nitrate 1 mM/<br>plant extract 5 % (2:1<br>v/v)<br>Temperature NM<br>Incubation time NM<br>pH NM | Spherical<br>20–50 nm      | Diffusion<br>37°C<br>24 h<br>pH NM<br>1×10 <sup>8</sup> CFU/ml<br>Ofloxacin 2 mg/ml | <i>B. subtilis</i> ATCC 6633<br><i>S. aureus</i> ATCC 29737<br><i>E. coli</i> ATCC 8739<br><i>Micrococcus flavus</i> ATCC<br>25619<br><i>P. aeruginosa</i> ATCC 25619<br><i>K. pneumoniae</i> ATCC 10031<br><i>B. pumilis</i> ATCC 12228 | 10<br>10<br>11<br>9<br>11<br>9<br>10 mm | [576] |
| <i>Dracocephalum moldavica</i> | Seeds  | Silver nitrate 1 mM/<br>plant extract 20 %<br>(100:1 v/v)<br>60°C<br>24 h<br>pH NM                      | Spherical<br>5–50 nm       | Diffusion<br>37°C<br>24 h<br>pH NM<br>Inoculum NM<br>No control                     | <i>E. coli</i><br><i>P. vulgaris</i><br><i>S. aureus</i><br><i>Serratia marcescens</i><br><i>S. epidermidis</i><br><i>B. subtilis</i>                                                                                                    | 18<br>13<br>8<br>20<br>11<br>10 mm      | [577] |

|                             |             |                                                                                                          |                       |                                                                                       |                                                                                                                                       |                               |       |
|-----------------------------|-------------|----------------------------------------------------------------------------------------------------------|-----------------------|---------------------------------------------------------------------------------------|---------------------------------------------------------------------------------------------------------------------------------------|-------------------------------|-------|
| <i>Biophytum sensitivum</i> | Fruits      | Silver nitrate 1 mM/<br>plant extract 10 %<br>(10:1 v/v)<br>Room temperature<br>1 h<br>pH NM             | Spherical<br>7.4 nm   | Diffusion<br>37°C<br>24 h<br>pH NM<br>1×10 <sup>8</sup> CFU/ml<br>Ciprofloxacin 30 µg | <i>E.coli</i> ATCC 1222<br><i>S. aureus</i> ATCC 6538-P                                                                               | 13<br>11 mm                   | [578] |
| <i>Helicteres isora</i>     | Roots       | Silver nitrate 1 mM/<br>plant extract 1 % (1:1<br>v/v)<br>Room temperature<br>6 h<br>pH NM               | Spherical<br>16–95 nm | Diffusion<br>37°C<br>24 h<br>pH NM<br>Inoculum NM<br>Streptomycin**                   | <i>E. coli</i><br><i>Vibrio cholera</i><br><i>S. typhi</i><br><i>P. aeruginosa</i><br><i>B. subtilis</i><br><i>Micrococcus luteus</i> | 4<br>6<br>8<br>7<br>8<br>8 mm | [579] |
| <i>Psidium guajava</i>      | Leaves      | Silver nitrate 1 mM/<br>plant extract 8 %<br>(100:1 v/v)<br>30°C<br>10 min<br>pH NM                      | Spherical<br>10–90 nm | Diffusion<br>37°C<br>24 h<br>pH NM<br>Inoculum NM<br>No control                       | <i>P. aeruginosa</i> MTCC 741                                                                                                         | 8 mm                          | [580] |
| <i>Vigna radiate</i>        | Seeds       | Silver nitrate 1 mM/<br>plant extract 20 %<br>(9:1 v/v)<br>Temperature NM<br>Incubation time NM<br>pH NM | Spherical<br>18 nm    | Diffusion<br>37°C<br>24 h<br>pH NM<br>Inoculum NM<br>No control                       | <i>E. coli</i><br><i>S. aureus</i>                                                                                                    | 20<br>16 mm                   | [581] |
| <i>Anthemis tropatana</i>   | Arial parts | Silver nitrate 1 mM /<br>plant extract 10 %<br>(25:1 v/v)<br>Room temperature<br>10 min<br>pH NM         | Spherical<br>38.9 nm  | Dilution<br>37°C<br>24 h<br>pH NM<br>5×10 <sup>5</sup> CFU/ml<br>No control           | <i>S.aureus</i> ATCC 6538<br><i>S. pyogenes</i> ATCC 19615<br><i>P. aeruginosa</i> ATCC 15442<br><i>E. coli</i> ATCC 25922            | 12.5<br>50<br>25<br>100 µg/ml | [582] |

|                           |        |                                                                                                           |                       |                                                                                                        |                                                                                                            |                               |       |
|---------------------------|--------|-----------------------------------------------------------------------------------------------------------|-----------------------|--------------------------------------------------------------------------------------------------------|------------------------------------------------------------------------------------------------------------|-------------------------------|-------|
| <i>Descurainia sophia</i> | Seeds  | Silver nitrate 4 mM /<br>plant extract 10 %<br>(9:1 v/v)<br>28°C<br>10 min<br>pH 4.5                      | Spherical<br>1–35 nm  | Dilution<br>37°C<br>48 h<br>pH NM<br>1.5×10 <sup>8</sup> CFU/ml<br>Rifampicin**                        | <i>Agrobacterium tumefaciens</i><br>15843<br><i>Agrobacterium rhizogenes</i> GV<br>3850                    | 4<br>4 µg/ml                  | [583] |
|                           |        |                                                                                                           |                       | Diffusion<br>28°C<br>3 days<br>pH NM<br>Inoculum NM<br>No control                                      | <i>Rhizoctonia solani</i>                                                                                  | 15 mm                         |       |
| <i>Cocoa pod husk</i>     | Host   | Silver nitrate 1 mM /<br>plant extract 10 %<br>(40:1 v/v)<br>30°C<br>10 min<br>pH NM                      | Spherical<br>4–32 nm  | Diffusion<br>37°C<br>18 h<br>pH NM<br>1×10 <sup>6</sup> CFU/ml<br>Cefuroxime 30 µg<br>Ampicillin 10 µg | <i>E. coli</i><br><i>K. pneumoniae</i>                                                                     | 14<br>10 mm                   | [584] |
|                           |        |                                                                                                           |                       | Diffusion<br>30 ± 2°C<br>48 h<br>pH NM<br>1×10 <sup>6</sup> CFU/ml<br>No control                       | <i>A. flavus</i><br><i>Aspergillus fumigatus</i><br><i>A. niger</i>                                        | 25<br>23<br>24 mm             |       |
| <i>Aloe vera</i>          | Leaves | Silver nitrate 10 mM /<br>plant extract 10%<br>(1:1 v/v)<br>Temperature NM<br>Incubation time NM<br>pH NM | Octahedron<br>5–50 nm | Diffusion<br>37°C<br>24 h<br>pH NM<br>1×10 <sup>7</sup> CFU/ml<br>Gentamycin**                         | <i>S. aureus</i><br><i>B. cereus</i><br><i>Micrococcus luteus</i><br><i>E. coli</i><br><i>K. pneumonia</i> | 43<br>38<br>33<br>42<br>38 mm | [585] |

|                                       |        |                                                                                                           |                           |                                                                                  |                                                                                                                                           |                                     |       |
|---------------------------------------|--------|-----------------------------------------------------------------------------------------------------------|---------------------------|----------------------------------------------------------------------------------|-------------------------------------------------------------------------------------------------------------------------------------------|-------------------------------------|-------|
| <i>Salmaia malabarica</i>             | Gum    | Silber nitrate 1 mM/<br>plant extract 5 % (1:1<br>v/v)<br>120°C<br>Incubation time NM<br>pH NM            | Spherical<br>7 ± 2 nm     | Diffusion<br>37°C<br>24 h<br>pH NM<br>Inoculum NM<br>Ampicillin**                | <i>E. coli</i><br><i>S. aureus</i>                                                                                                        | 16<br>18 mm                         | [586] |
| <i>Taxus yunnanensis</i>              | Callus | Silver nitrate 1 mM/<br>plant extract 20 %<br>(9 :1 v/v)<br>37°C<br>24 h<br>pH 9                          | Spherical<br>6.4–27.2 nm. | Dilution<br>37°C<br>24 h<br>pH NM<br>1×10 <sup>6</sup> CFU/ml<br>Gentamycin 1 mM | <i>S. aureus</i> CMCC(B) 26003<br><i>S. paratyphi B</i> CMCC(B) 50094<br><i>B. subtilis</i> CMCC(B) 63501<br><i>E. coli</i> CMCC(B) 44102 | 2<br>2<br>2<br>2 µg/ml              | [587] |
| <i>Thevetia peruviana</i>             | Leaves | Silver nitrate 1 mM/<br>plant extract 10 % (4:1<br>v/v)<br>50°C<br>30 min<br>pH NM                        | Spherical<br>18.1 nm      | Diffusion<br>37°C<br>18–24 h<br>pH 7<br>Inoculum NM<br>No control                | <i>E. coli</i><br><i>P. aeruginosa</i><br><i>K. pneumoniae</i><br><i>S. aureus</i><br><i>B. subtilis</i><br><i>S. typhi</i>               | 10<br>10<br>15<br>20<br>11<br>12 mm | [588] |
|                                       |        |                                                                                                           |                           | Diffusion<br>28°C<br>18–24 h<br>pH 7<br>1×10 <sup>5</sup> CFU/ml<br>No control   | <i>C. albicans</i><br><i>A. niger</i>                                                                                                     | 20<br>20 mm                         |       |
| Hesperidin ( <i>Citrus sinensis</i> ) | Leaves | Silver nitrate 1 mM/<br>plant extract 0.02 %<br>(9:1 v/v)<br>Temperature NM<br>Incubation time NM<br>pH 7 | Oval<br>5–50 nm           | Diffusion<br>37°C<br>24 h<br>pH NM<br>2.5×10 <sup>5</sup> CFU/ml<br>No control   | <i>E. coli</i> MTCC 4604<br><i>Pseudomonas putida</i> MTCC 1194<br><i>S. aureus</i> NCIM 2127                                             | 6<br>5<br>7 mm                      | [589] |
| Naringin ( <i>Citrus sinensis</i> )   |        |                                                                                                           | Oval<br>5–40 nm           |                                                                                  | <i>E. coli</i> MTCC 4604<br><i>Pseudomonas putida</i> MTCC 1194<br><i>S. aureus</i> NCIM 2127                                             | 6<br>5<br>5 mm                      |       |

|                                    |        |                                                                                                             |                                         |                                                                           |                                                                                                          |                               |       |
|------------------------------------|--------|-------------------------------------------------------------------------------------------------------------|-----------------------------------------|---------------------------------------------------------------------------|----------------------------------------------------------------------------------------------------------|-------------------------------|-------|
| Diosmin ( <i>Citrus sinensis</i> ) |        |                                                                                                             | Hexagonal<br>20–80 nm                   |                                                                           | <i>E. coli</i> MTCC 4604<br><i>Pseudomonas putida</i> MTCC 1194<br><i>S. aureus</i> NCIM 2127            | 6<br>6<br>7 mm                |       |
| <i>Indigofera tinctoria</i>        | Leaves | Silver nitrate 1 mM/<br>plant extract 10 % (9:1 v/v)<br>Temperature NM<br>Incubation time NM<br>pH NM       | Spherical<br>9–26 nm                    | Diffusion<br>37°C<br>24–48h<br>pH NM<br>Inoculum NM<br>No control         | <i>Pseudomonas spp</i><br><i>B. pumilis</i><br><i>S. aureus</i><br><i>E. coli</i>                        | 28<br>13<br>22<br>25 mm       | [590] |
|                                    |        |                                                                                                             |                                         | Diffusion<br>37°C<br>24–48 h<br>pH NM<br>Inoculum size NM<br>No control   | <i>Aspergillus fumigates</i><br><i>A. niger</i>                                                          | 16<br>18 mm                   |       |
| <i>Justicia adhatoda</i>           | Roots  | Silver nitrate 1mM/<br>plant extract 10 %<br>(10:1 v/v)<br>60°C<br>20 min<br>pH NM                          | Spherical<br>25 nm                      | Diffusion<br>37°C<br>24 h<br>pH NM<br>Inoculum NM<br>Tétracyclin**        | <i>S. paratyphi</i><br><i>P. aeruginosa</i>                                                              | 15<br>10 mm                   | [591] |
| <i>Skimmia laureola</i>            | Leaves | Silver nitrate 1 mM/<br>plant extract 10 %<br>(10:1 v/v)<br>Room temperature<br>Incubation time NM<br>pH NM | Spherical and<br>hexagonal<br>38±0.3 nm | Diffusion<br>37°C<br>24 h<br>pH NM<br>Inoculum NM<br>Tetracyclin 10 µg/ml | <i>E. coli</i><br><i>K. pneumoniae</i><br><i>P. aeruginosa</i><br><i>P. vulgaris</i><br><i>S. aureus</i> | 14<br>12<br>13<br>13<br>13 mm | [592] |
| <i>Justicia adhatoda</i>           | Leaves | Silver nitrate 1 mM/<br>plant extract 8 % (7:3 v/v)<br>60°C                                                 | Spherical<br>5–50 nm                    | Diffusion<br>37°C<br>24 h<br>pH NM                                        | <i>P. aeruginosa</i> MTCC 741                                                                            | 9 mm                          | [593] |



|                              |        |                                                                                                          |                            |                                                                                                       |                                                                                                                                                            |                                        |       |
|------------------------------|--------|----------------------------------------------------------------------------------------------------------|----------------------------|-------------------------------------------------------------------------------------------------------|------------------------------------------------------------------------------------------------------------------------------------------------------------|----------------------------------------|-------|
|                              |        | 0.5 h<br>pH NM                                                                                           |                            | Inoculum NM<br>No control                                                                             |                                                                                                                                                            |                                        |       |
| <i>Caesalpinia ferrea</i>    | Seed   | Silver nitrate 3 mM/<br>plant extract 0.1 %<br>(99:1 v/v)<br>25°C<br>96 h<br>pH NM                       | Spheroidal<br>30–50 nm     | Dilution<br>35 ± 2°C<br>48 h<br>pH 7<br>5–25×10 <sup>2</sup> CFU/ml<br>Amphotericin B**<br>Nystatin** | <i>C. albicans</i> ATCC 10231<br><i>Candida glabrata</i><br><i>Candida krusei</i><br><i>Candida guilliermondii</i>                                         | 312.5<br>156,3<br>312.5<br>156.3 µg/ml | [594] |
| <i>Alphonsea sclerocarpa</i> | Leaves | Silver nitrate 1 mM/<br>plant extract 3 %<br>(2.5:1 v/v)<br>65°<br>1 h<br>pH NM                          | Irregular<br>20–40 nm      | Diffusion<br>25 °C<br>72 h<br>pH NM<br>1.5×10 <sup>8</sup> CFU/ml<br>Fluconazol 10µg/100µl            | <i>Aspergillus brasiliensis</i><br><i>A. flavus</i><br><i>A. niger</i><br><i>Alternaria solani</i><br><i>C. albicans</i>                                   | 20<br>10<br>11<br>10<br>12mm           | [595] |
| <i>Oryza sativa</i>          | Seeds  | Silver nitrate 1 mM/<br>plant extract 20 % (4:1<br>v/v)<br>Room temperature<br>24 h<br>pH NM             | Spherical<br>17.3 ± 0.9 nm | Diffusion<br>25°C<br>2–3 days<br>pH NM<br>Inoculum NM<br>No control                                   | <i>Purycularia oryzae</i>                                                                                                                                  | 28 mm                                  | [596] |
| <i>Saccharum officinarum</i> | Leaves | Silver nitrate 1 mM/<br>plant extract 20 % (8:1<br>v/v)<br>Temperature NM<br>Incubation time NM<br>pH NM | Spherical<br>20–50 nm      | Diffusion<br>Temperature NM<br>Incubation time NM<br>pH NM<br>Inoculum NM<br>Nystatin**               | <i>Phytophthora capsici</i><br><i>Phytophthora drechsleri</i><br><i>Didymella bryoniae</i><br><i>Colletotrichum acutatum</i><br><i>Cladosporium fulvum</i> | 5<br>4<br>0<br>4<br>4 mm               | [597] |
| <i>Gymnema sylvestre</i>     | Callus | Silver nitrate 1 mM/<br>plant extract 10 %<br>(9:1 v/v)<br>Temperature NM                                | Spherical<br>3–30 nm       | Diffusion<br>28°C<br>24 h<br>pH NM                                                                    | <i>C. albicans</i><br><i>Candida nonalbicans</i><br><i>Candida tropicalis</i>                                                                              | 15<br>13<br>16 mm                      | [598] |

|                               |           |                                                                                          |                            |                                                                              |                                                                                                                                   |                              |       |
|-------------------------------|-----------|------------------------------------------------------------------------------------------|----------------------------|------------------------------------------------------------------------------|-----------------------------------------------------------------------------------------------------------------------------------|------------------------------|-------|
|                               |           | 24 h<br>pH NM                                                                            |                            | Inoculum size NM<br>Voriconazole**<br>Amphotericin B**                       |                                                                                                                                   |                              |       |
| <i>Arnicae anthodium</i>      | Leaves    | Silver nitrate 1 mM/<br>plant extract 4.5 %<br>(9:1 v/v)<br>25°C<br>24 h<br>pH NM        | Spherical<br>90–118 nm     | Dilution<br>34 °C<br>18 h<br>pH NM<br>1×10 <sup>6</sup> CFU/ml<br>Nystatin** | <i>C. albicans</i> ATCC 10231                                                                                                     | 0.2 µg/ml                    | [599] |
| <i>Amaranthus gangeticus</i>  | Leaves    | Silver nitrate 1 mM/<br>plant extract 10 %<br>(5:1.5 v/v)<br>20 min<br>80°C<br>pH NM     | Globular<br>11–15 nm       | Dilution<br>25°C<br>48 h<br>pH NM<br>1×10 <sup>8</sup> CFU/ml<br>No control  | <i>Sclerotinia spp</i>                                                                                                            | 0.2 µg/ml                    | [307] |
| <i>Syzygium alternifolium</i> | Stem bark | Silver nitrate 1 mM/<br>plant extract 25 %<br>(10:1 v/v)<br>60–80°C<br>1 h<br>pH NM      | Spherical<br>4–48 nm       | Diffusion<br>37°C<br>24 h<br>pH NM<br>Inoculum NM<br>Fluconazole 50 µg/ml    | <i>Alternaria solani</i><br><i>A. niger</i><br><i>A. flavus</i><br><i>Penicillium chrysogenum</i><br><i>Trichoderma harzianum</i> | 10<br>9<br>11<br>10<br>11 mm | [600] |
| <i>Alpinia galanga</i>        | Rhizome   | Silver nitrate 1 mM/<br>plant extract 5 % (9:1<br>v/v)<br>Temperature NM<br>3 h<br>pH NM | Spherical<br>20.8 ± 1.8 nm | Diffusion<br>37°C<br>48 h<br>pH NM<br>Inoculum size NM<br>No control         | <i>A. niger</i>                                                                                                                   | 29 mm                        | [601] |
| <i>Guignardia mangiferae</i>  | Leaves    | Silver nitrate 1 mM/<br>plant extract 5% (1:1<br>v/v)<br>48 h<br>80°C                    | Spherical<br>5–30 nm       | Diffusion<br>37°C<br>20 h<br>pH 7<br>5×10 <sup>5</sup> CFU/ ml               | <i>A. niger</i><br><i>Colletotrichum spp</i><br><i>Curvularia lunata</i><br><i>Fusarium spp</i><br><i>Rhizoctonia solani</i>      | 9<br>12<br>11<br>10<br>12 mm | [602] |

|                             |        |                                                                                              |                             |                                                                                                  |                                                                                                                                                                                    |                           |       |
|-----------------------------|--------|----------------------------------------------------------------------------------------------|-----------------------------|--------------------------------------------------------------------------------------------------|------------------------------------------------------------------------------------------------------------------------------------------------------------------------------------|---------------------------|-------|
|                             |        | pH 10                                                                                        |                             | Amphotericin B 1 mg/ ml                                                                          |                                                                                                                                                                                    |                           |       |
| <i>Phoenix dactylifera</i>  | Fruits | Silver nitrate 5 mM/<br>plant extract 20 % (2:1<br>v/v)<br>28°C<br>Temperature NM<br>pH NM   | Spherical<br>1–40 nm        | Diffusion<br>28 ± 1°C<br>72 h<br>pH NM<br>Inoculum NM<br>No control                              | <i>Rhizoctonia solani</i>                                                                                                                                                          | 18 mm                     | [603] |
| <i>Ocimum tenuiflorum</i>   | Leaves | Silver nitrate 2 mM/<br>plant extract 10 % (9:1<br>v/v)<br>Room temperature<br>24 h<br>pH NM | Spherical<br>2–7 nm         | Dilution<br>35°C<br>24 h<br>pH NM<br>4.5×10 <sup>5</sup> CFU/ml<br>Fluconazole 4 µg              | <i>C. albicans</i> ATCC 90028<br><i>Candida tropicalis</i> ATCC 750<br><i>Candida glabrata</i> ATCC 90030                                                                          | 60<br>30<br>30 µg/ml      | [604] |
| <i>Erythrina suberosa</i>   | Leaves | Silver nitrate 1 mM/<br>plant extract 10 % (9:1<br>v/v)<br>Room temperature<br>24 h<br>pH NM | Spherical<br>15–34 nm       | Diffusion<br>Temperature NM<br>Incubation time NM<br>pH NM<br>Inoculum size NM<br>Clotrimazole** | <i>C. albicans</i> MTCC227<br><i>Candida krusei</i> MTCC 9215<br><i>Trichophyton mentagrophytes</i><br>MTCC 8476<br><i>Candida viswanathii</i> MTCC<br>1929                        | 0<br>15<br>16<br><br>0 mm | [605] |
| <i>Brassica rapa</i>        | Leaves | Silver nitrate 1 mM/<br>plant extract 30 % (5:1<br>v/v)<br>28°C<br>24 h<br>pH NM             | Spherical<br>16.1 nm        | Diffusion<br>30 °C<br>48 h<br>pH NM<br>Inoculum NM<br>No control                                 | <i>Gloeophyllum abietinum</i><br>KACC 51949<br><i>Gloeophyllum trabeum</i> KACC<br>43361<br><i>Chaetomium globosum</i> KACC<br>42262<br><i>Phanerochaete sordida</i> KACC<br>43367 | 3<br><br>8<br>6<br>12 mm  | [606] |
| <i>Phyllanthus urinaria</i> | Leaves | Silver nitrate 1 mM/<br>plant extract 2 % (1:10<br>v/v)<br>25°C<br>8 h                       | Spherical<br>28.3 nm        | Diffusion<br>Room temperature<br>96 h<br>pH NM<br>Inoculum size NM                               | <i>A. niger</i><br><i>Fusarium oxysporum</i><br><i>A. flavus</i>                                                                                                                   | 10<br>12<br>16 mm         | [607] |
| <i>Pouzolzia zeylanica</i>  |        |                                                                                              | Hexagonal and<br>triangular |                                                                                                  | <i>A. niger</i>                                                                                                                                                                    | 6                         |       |

|                             |        |                                                                                                          |                                                       |                                                                                                     |                                                                                                                                                                  |                               |       |
|-----------------------------|--------|----------------------------------------------------------------------------------------------------------|-------------------------------------------------------|-----------------------------------------------------------------------------------------------------|------------------------------------------------------------------------------------------------------------------------------------------------------------------|-------------------------------|-------|
|                             |        | pH 7                                                                                                     | 26.7 nm                                               | No control                                                                                          | <i>Fusarium oxysporum</i><br><i>A. flavus</i>                                                                                                                    | 8<br>11 mm                    |       |
| <i>Scoparia dulcis</i>      |        |                                                                                                          | Spherical<br>5 nm                                     |                                                                                                     | <i>A. niger</i><br><i>Fusarium oxysporum</i><br><i>A. flavus</i>                                                                                                 | 13<br>12<br>15 mm             |       |
| <i>Tagetes erecta</i>       | Flower | Silver nitrate 1 mM/<br>plant extract 10 %<br>(20:3 v/v)<br>Room temperature<br>24 h<br>pH NM            | Spherical,<br>triangular and<br>irregular<br>10–90 nm | Diffusion<br>Temperature NM<br>Incubation time NM<br>pH NM<br>Inoculum size NM<br>Nystatin 30 µg/ml | <i>C. albicans</i> NCIM 3102<br><i>Candida glabrata</i> NCIM 3448<br><i>Candida neoformans</i> NCIM 3542                                                         | 32<br>21<br>25 mm             | [608] |
| <i>Allium cepa</i>          | Bulb   | Silver nitrate 5 mM/<br>plant extract 30 % (5:1<br>v/v)                                                  | Spherical<br>1–10 nm                                  | Dilution<br>28°C<br>48 h                                                                            | <i>Fusarium oxysporum</i> MTCC 3656                                                                                                                              | 10.7 µg/ml                    | [609] |
| <i>Musa acuminata</i>       | Leaves | 50°C<br>1 h<br>pH 12                                                                                     | Spherical<br>15–25 nm                                 | pH NM<br>1×10 <sup>8</sup> CFU/ml<br>No control                                                     | <i>Fusarium oxysporum</i> MTCC 3656                                                                                                                              | 5.4 µg/ml                     |       |
| <i>Alstonia scholaris</i>   | Bark   | Silver nitrate 1 mM/<br>plant extract 10 %<br>(9:1 v/v)<br>Temperature NM<br>Incubation time NM<br>pH NM | Spherical<br>50 nm                                    | Diffusion<br>37°C<br>10 days<br>pH NM<br>Inoculum size NM<br>No control                             | <i>Aspergillus fumigates</i><br><i>A. niger</i><br><i>Aspergillus clavatus</i><br><i>Cephalosporium acremonium</i><br><i>Trichoderma spp</i><br><i>R. sporus</i> | 4<br>4<br>3<br>2<br>3<br>3 mm | [610] |
| <i>Allamanda cathartica</i> | Leaves | Silver nitrate 1 mM/<br>plant extract 5 % (1:1<br>v/v)<br>Temperature NM<br>Incubation time NM<br>pH NM  | Spherical<br>19–34.9 nm                               | Diffusion<br>Temperature NM<br>7 days<br>pH NM<br>Inoculum NM<br>Nystatin**                         | <i>A. flavus</i><br><i>A. niger</i><br><i>Curcuvalaria lunata</i><br><i>Fusarium porum</i><br><i>Rhizopus arrhizus</i>                                           | 12<br>10<br>12<br>7<br>13 mm  | [611] |

|                                |        |                                                                                                |                       |                                                                               |                                                                                                                                                                                                                                                                                                                                  |                                                      |       |
|--------------------------------|--------|------------------------------------------------------------------------------------------------|-----------------------|-------------------------------------------------------------------------------|----------------------------------------------------------------------------------------------------------------------------------------------------------------------------------------------------------------------------------------------------------------------------------------------------------------------------------|------------------------------------------------------|-------|
| <i>Rhinacanthus nasutus</i>    | Leaves | Silver nitrate 1 mM/<br>plant extract 10 % (9:1<br>v/v)<br>60–80°C<br>20 min<br>pH NM          | Spherical<br>22 nm    | Diffusion<br>37°C<br>48 h<br>pH NM<br>Inoculum size NM<br>Ciprofloxacin 10 µg | <i>A. niger</i><br><i>A. flavus</i>                                                                                                                                                                                                                                                                                              | 18<br>19 mm                                          | [612] |
| <i>Sesuvium portulacastrum</i> | Callus | Silver nitrate 1 mM/<br>plant extract 20 %<br>(9:1 v/v)<br>Temperature NM<br>24 h<br>pH NM     | Spherical<br>5–20 nm  | Diffusion<br>37°C<br>24 h<br>pH NM<br>10 <sup>3</sup> CFU/ml<br>No control    | <i>Alternaria alternata</i><br><i>Penicillium italicum</i><br><i>Fusarium equisetii</i><br><i>C. albicans</i>                                                                                                                                                                                                                    | 16<br>18<br>17<br>13 mm                              | [613] |
|                                | Leaf   |                                                                                                |                       |                                                                               | <i>Alternaria alternata</i><br><i>Penicillium italicum</i><br><i>Fusarium equisetii</i><br><i>C. albicans</i>                                                                                                                                                                                                                    | 15<br>14<br>14<br>15 mm                              |       |
| <i>Brassica oleracea</i>       | Leaves | Silver nitrate 1 mM/<br>plant extract 8 % (10:1<br>v/v)<br>Room temperature<br>10 min<br>pH NM | Spherical<br>20 nm    | Diffusion<br>37°C<br>24 h<br>pH NM<br>1×10 <sup>8</sup> CFU/ml<br>No control  | <i>Bacteroides fragilis</i> ATCC<br>25285<br><i>P. aeruginosa</i> ATCC 9027<br><i>S. aureus</i> ATCC 6538<br><i>Enterococcus faecalis</i> ATCC<br>33186<br><i>S. pneumoniae</i> ATCC 10015<br><i>P. mirabilis</i> ATCC 12453<br><i>K. pneumoniae</i> ATCC 10031<br><i>E. coli</i> ATCC 25922<br><i>S. epidermidis</i> ATCC 12228 | 9<br>12<br>10<br>11<br>10<br>11<br>10<br>10<br>14 mm | [614] |
| <i>Citrus tangerina</i>        | Peels  | Silver nitrate 1 mM/<br>plant extract 10 %<br>(40:3 v/v)<br>Room temperature<br>5 h<br>pH NM   | Spherical<br>10–70 nm | Diffusion<br>37°C                                                             | <i>E. coli</i><br><i>S. aureus</i>                                                                                                                                                                                                                                                                                               | 20<br>14 mm                                          | [615] |
| <i>Citrus sinensis</i>         |        |                                                                                                | Spherical<br>5–80 nm  | 48–72 h<br>pH NM                                                              | <i>E. coli</i><br><i>S. aureus</i>                                                                                                                                                                                                                                                                                               | 21<br>17 mm                                          |       |
| <i>Citrus limon</i>            |        |                                                                                                | Spherical<br>10–50 nm | Inoculum NM<br>No control                                                     | <i>E. coli</i><br><i>S. aureus</i>                                                                                                                                                                                                                                                                                               | 20<br>16 mm                                          |       |

|                                     |         |                                                                                                 |                      |                                                                                         |                                                                                                                                                                                                                                                                                                                                                                                                  |                                                                                                 |       |
|-------------------------------------|---------|-------------------------------------------------------------------------------------------------|----------------------|-----------------------------------------------------------------------------------------|--------------------------------------------------------------------------------------------------------------------------------------------------------------------------------------------------------------------------------------------------------------------------------------------------------------------------------------------------------------------------------------------------|-------------------------------------------------------------------------------------------------|-------|
| <i>Abelmoschus esculentus</i>       | Flowers | Silver nitrate 1 mM/<br>plant extract 5 %<br>(25:1 v/v)<br>Room temperature<br>72 h<br>pH NM    | Spherical<br>16.2 nm | Diffusion<br>37°C<br>24 h<br>pH NM<br>1×10 <sup>6</sup> CFU/ml<br>Ciprofloxacin 1 mg/ml | <i>B. subtilis</i> MTCC 441<br><i>S. aureus</i> ATCC 29213<br><i>S. epidermidis</i> MTCC 3615<br><i>S. pyogenes</i> ATCC 29213<br><i>K. pneumoniae</i> G455<br><i>E. coli</i> ATCC 25922<br><i>P. aeruginosa</i> ATCC 27584<br><i>P. vulgaris</i> ATCC 8427<br><i>S. typhi</i> ATCC 14028<br><i>Shigella sonnei</i>                                                                              | 12<br>13<br>12<br>13<br>14<br>13<br>11<br>16<br>12<br>14 mm                                     | [616] |
| <i>Amorphophallus paeoniifolius</i> | Tuber   | Silver nitrate 10 mM/<br>plant extract 0.1 %<br>(1:1 v/v)<br>Temperature NM<br>2–3 min<br>pH NM | Spherical<br>22.5 nm | Diffusion<br>37°C<br>48 h<br>pH NM<br>Inoculum NM<br>Ciprofloxacin**                    | <i>E. coli</i><br><i>Citrobacter freundii</i><br><i>B. subtilis</i><br><i>P. aeruginosa</i><br><i>S. typhi</i><br><i>S. aureus</i>                                                                                                                                                                                                                                                               | 18<br>16<br>14<br>20<br>17<br>13 mm                                                             | [617] |
| <i>Rumexa cetosa</i>                | Leaves  | Silver nitrate 6 mM/<br>plant extract 20 %<br>(10 :1 v/v)<br>60°C<br>12 h<br>pH 7.5             | Spherical<br>5–80 nm | Diffusion<br>37°C<br>24 h<br>pH 7.2<br>Inoculum NM<br>No control                        | <i>B. cereus</i><br><i>Enterococcus spp</i><br><i>E. coli</i><br><i>Klebsiella spp</i><br><i>Proteus mirabilis</i><br><i>Proteus vulgaris</i><br><i>Pseudomonas spp</i><br><i>S. paratyphy A</i><br><i>S. typhi</i><br><i>S. typhimurium</i><br><i>Serratia</i><br><i>Shigella dysentery A</i><br><i>Shigella flexneri</i><br><i>S. aureus</i><br><i>S. epidermidis</i><br><i>Vibrio cholera</i> | 16<br>15<br>18<br>15<br>15<br>16<br>13<br>13<br>14<br>15<br>16<br>18<br>17<br>18<br>18<br>16 mm | [618] |

|                                   |             |                                                                                                 |                       |                                                                                                  |                                                                                                                                                                              |                                       |       |
|-----------------------------------|-------------|-------------------------------------------------------------------------------------------------|-----------------------|--------------------------------------------------------------------------------------------------|------------------------------------------------------------------------------------------------------------------------------------------------------------------------------|---------------------------------------|-------|
| <i>Vaccinium arctostaphylos</i>   | Leaves      | Silver nitrate 3 mM/<br>plant extract 10 % (1:1<br>v/v)<br>Room temperature<br>20 min<br>pH NM  | Spherical<br>7–16 mm  | Diffusion<br>37°C<br>24 h<br>pH NM<br>1×10 <sup>8</sup> CFU/ml<br>Gentamycin**<br>Streptomycin** | <i>S. aureus</i> ATCC 25923<br><i>B. subtilis</i> ATCC 9372<br><i>E. coli</i> ATCC 25922                                                                                     | 14<br>15<br>11 mm                     | [619] |
| <i>Stenocereus queretaroensis</i> | Fruit peels | Silver nitrate 2 mM/<br>plant extract 1 % (20:1<br>v/v)<br>90°C<br>24 h<br>pH NM                | Spherical<br>99 nm    | Dilution<br>37°C<br>24 h<br>pH NM<br>1.5×10 <sup>8</sup> CFU/ml<br>No control                    | <i>E. coli</i><br><i>S. enterica</i><br><i>P. aeruginosa</i><br><i>S. aureus</i><br>MRSA                                                                                     | 0.3<br>0.1<br>0.2<br>0.3<br>0.3 µg/ml | [620] |
| <i>Ocimum tenuiflorum</i>         | Leaves      | Silver nitrate 1 mM/<br>plant extract 1.5 %<br>(1:10 v/v)<br>37°C<br>24–48 h<br>pH NM           | Irregular<br>28 nm    | Diffusion<br>35°C<br>18 h<br>pH NM<br>Inoculum NM<br>No control                                  | <i>S. aureus</i><br><i>P. aeruginosa</i><br><i>E. coli</i><br><i>K. pneumoniae</i>                                                                                           | 25<br>20<br>30<br>19 mm               | [621] |
| <i>Lippia citriodora</i>          | Leaves      | Silver nitrate 1 mM/<br>plant extract 10 %<br>(1:1 v/v)<br>37°C<br>24 h<br>pH NM                | Spherical<br>20 nm    | Diffusion<br>37 °C<br>24 h<br>pH NM<br>Inoculum NM<br>Tetracyclin 0.1 mg/ml                      | <i>S. aureus</i>                                                                                                                                                             | 19 mm                                 | [622] |
| <i>Ocimum gratissimum</i>         | Leaves      | Silver nitrate 5 mM/<br>plant extract 2.5 %<br>(1:0.06 v/v)<br>Room temperature<br>24 h<br>pH 9 | Hexagonal<br>12-60 nm | Disc diffusion<br>37°C<br>24 h<br>pH NM<br>10 <sup>5</sup> –10 <sup>6</sup> CFU/ml<br>No control | <i>Staphylococcus aureus</i><br>MTCC7443<br><i>Micrococcus luteus</i> MTCC 4821<br><i>B. Subtilis</i> MTCC 2389<br><i>E. coli</i> MTCC2127<br><i>K. pneumoniae</i> MTCC 7162 | 7.5<br>8<br>8<br>10<br>12.5 mm        | [623] |

\*MIC=minimal inhibition concentration; ZOI=zone of inhibition; PI=percentage of inhibition

\*\*The quantity or concentration is not mentioned.

NM=not mentioned, MRSA=methicillin-resistant *S. aureus*

Table S2. Green gold nanoparticles exhibiting antibacterial and antifungal activities



| Plant type                    | Part used | Operative conditions for synthesis                                             | NP characteristics (shape and size) | Microbiological analyses (operative conditions)                                          |                                                                                                                                                                             |                                                 | Ref.  |
|-------------------------------|-----------|--------------------------------------------------------------------------------|-------------------------------------|------------------------------------------------------------------------------------------|-----------------------------------------------------------------------------------------------------------------------------------------------------------------------------|-------------------------------------------------|-------|
|                               |           |                                                                                |                                     | Methods, Incubation temperature, incubation time, pH, inoculum density, positive control | Tested bacteria                                                                                                                                                             | MIC, DOI or PI*                                 |       |
| <i>Convolvulus fruticosus</i> | Flowers   | Chloroauric acid 5 mM / plant extract 15 % (5:2 v/v)<br>50°C<br>24 h<br>pH NM  | Spherical<br>35 nm                  | Dilution<br>37°C<br>18 h<br>pH NM<br>1×10 <sup>7</sup> CFU/ml<br>Ciprofloxacin**         | <i>E. coli</i><br><i>Acinetobacter baumannii</i><br><i>P. aeruginosa</i><br><i>S. aureus</i><br><i>K. pneumoniae</i><br><i>P. mirabilis</i><br><i>Enterococcus faecalis</i> | 75<br>75<br>75<br>75<br>150<br>75<br>37.5 µg/ml | [624] |
| <i>Acalypha indica</i>        | Leaves    | Chloroauric acid 1 mM/ plant extract 30 % (1:1 v/v)<br>100°C<br>15 min<br>pH 7 | Spherical<br>20 nm                  | Disc diffusion<br>37°C<br>24 h<br>pH NM<br>1×10 <sup>8</sup> CFU/ml<br>No control        | <i>S. epidermidis</i><br><i>E. coli</i>                                                                                                                                     | 31<br>26 mm                                     | [625] |
| <i>Euphorbia wallichii</i>    | Leaves    | Chloroauric acid 1 mM/ plant extract 5 % (1:10 v/v)<br>30°C<br>24 h<br>pH NM   | Spherical<br>28 nm                  | Dilution<br>34°C<br>24 h<br>pH NM<br>Inoculum size NM<br>Streptomycin**                  | <i>E. coli</i><br><i>S. aureus</i><br><i>B. pumilus</i><br><i>P. aeruginosa</i><br><i>K. pneumoniae</i>                                                                     | 21<br>15<br>21<br>17<br>17 mm                   | [626] |

|                                 |        |                                                                                           |                       |                                                                                                      |                                                                                                                                                                                       |                                         |       |
|---------------------------------|--------|-------------------------------------------------------------------------------------------|-----------------------|------------------------------------------------------------------------------------------------------|---------------------------------------------------------------------------------------------------------------------------------------------------------------------------------------|-----------------------------------------|-------|
| <i>Guazuma ulmifolia</i>        | Bark   | Chloroauric acid 1 mM / plant extract 10 % (10:1 v/v)<br>Room temperature<br>1 h<br>pH NM | Spherical<br>20–25 nm | Diffusion<br>37°C<br>48 h<br>pH NM<br>Inoculum size NM<br>Neomycin**                                 | <i>B. subtilis</i><br><i>S. aureus</i><br><i>S. pneumoniae</i><br><i>E. coli</i><br><i>P. vulgaris</i><br><i>Shigella dysenteriae</i><br><i>K. pneumoniae</i><br><i>P. aeruginosa</i> | 5<br>3<br>7<br>6<br>5<br>0<br>1<br>1 mm | [627] |
|                                 |        |                                                                                           |                       | Diffusion<br>27°C<br>72 h<br>pH NM<br>Inoculum size NM<br>Amphotricin B**                            | <i>Trichoderma viridae</i><br><i>Fusarium solani</i><br><i>A. niger</i><br><i>Nigrospora oryzae</i><br><i>Aspergillus fumigatus</i><br><i>C. albicans</i>                             | 2<br>6<br>4<br>0<br>0<br>0 mm           |       |
| <i>Glycyrrhiza uralensis</i>    | Roots  | Chloroauric acid 1 mM/ (1:1 v/v)<br>80°C<br>24 h<br>pH NM                                 | Spherical<br>12 nm    | Diffusion<br>30°C<br>24 h<br>pH NM<br>Inoculum size NM<br>Neomycin 30 µg                             | <i>S. aureus</i><br><i>E. coli</i><br><i>Salmonella enterica</i><br><i>P. aeruginosa</i>                                                                                              | 13<br>17<br>14<br>11 mm                 | [628] |
| <i>Artocarpus heterophyllus</i> | Fruit  | Chloroauric acid 2 mM/ plant extract 20 % (1:5 v/v)<br>90°C<br>2 h<br>pH NM               | Spherical<br>20–25 nm | Diffusion<br>37°C<br>24 h<br>pH NM<br>Inoculum size NM<br>Ampicillin**<br>Penicillin**<br>Bavistin** | <i>E. coli</i><br><i>Streptobacillus spp</i>                                                                                                                                          | 17<br>15 mm                             | [629] |
| <i>Allium noeanum</i>           | Leaves | Chloroauric acid 1 mM/ plant extract 10 % (10:1 v/v)<br>50°C                              | Spherical<br>10–30 nm | Dilution<br>37°C<br>24 h<br>pH NM                                                                    | <i>S. pneumoniae</i><br><i>B. subtilis</i><br><i>S. aureus</i><br><i>Staphylococcus saprophyticus</i>                                                                                 | 60 µg/ml                                | [630] |

|                             |        |                                                                                  |                        |                                                                                                                      |                                                                                                                                                                         |                                  |       |
|-----------------------------|--------|----------------------------------------------------------------------------------|------------------------|----------------------------------------------------------------------------------------------------------------------|-------------------------------------------------------------------------------------------------------------------------------------------------------------------------|----------------------------------|-------|
|                             |        | 0.5 h<br>pH NM                                                                   |                        | Inoculum size NM<br>No control                                                                                       | <i>S. typhi</i><br><i>P. aeruginosa</i><br><i>Shigella flexneri</i><br><i>E. coli</i>                                                                                   |                                  |       |
| <i>Ribes nigrum</i>         | Fruit  | Chloroauric acid 0.3 mM/ plant extract 2.5 % (1:1 v/v)<br>90°C<br>24 h<br>pH NM  | Hexagonal<br>20 nm     | Dilution<br>34°C<br>24–48 h<br>pH NM<br>5×10 <sup>5</sup> CFU/ml<br>Amikacin**                                       | <i>S. aureus</i> NCTC 4163<br><i>P. aeruginosa</i> NCTC 6749<br><i>E. coli</i> ATCC 25922<br><i>P. aeruginosa</i> K1<br><i>S. aureus</i> K1                             | 13<br>13<br>13<br>13<br>13 µg/ml | [631] |
|                             |        |                                                                                  |                        | Dilution<br>34°C<br>pH NM<br>48h<br>2.5–1×10 <sup>5</sup> CFU/ml<br>Nystatin**                                       | <i>C. albicans</i> ATCC 10231<br><i>C. albicans</i> K1<br><i>A. niger</i> ATCC 16404<br><i>Trichophyton rubrum</i> ATCC 28188                                           | 26<br>26<br>26<br>26 µg/ml       |       |
| <i>Memecylon umbellatum</i> | Leaves | Chloroauric acid 1 mM/ plant extract 10 % (1:2 v/v)<br>37°C<br>24 h<br>pH NM     | Spherical<br>15–25 nm  | Diffusion<br>37°C<br>24 h<br>pH NM<br>Inoculum size NM<br>Ofloxacin 10 µg<br>Ciprofloxacin 10 µg<br>Netilmicin 30 µg | <i>P. aeruginosa</i><br><i>Streptococcus pyogenes</i><br><i>Enterococcus faecalis</i>                                                                                   | 10<br>14.5<br>7 mm               | [632] |
| <i>Citrullus lanatus</i>    | Rind   | Gold (III) chloride 1 mM/ plant extract 50 % (10:1 v/v)<br>100°C<br>1 h<br>pH NM | Spherical<br>20–140 nm | Diffusion<br>37°C<br>24 h<br>pH NM<br>Inoculum size NM<br>Kanamycin 5 µg                                             | <i>B. cereus</i> ATCC 13061<br><i>E. coli</i> ATCC 43890<br><i>Listeria monocytogenes</i> ATCC 19115<br><i>S. aureus</i> ATCC 49444<br><i>S. typhimurium</i> ATCC 43174 | 11<br>9<br>0<br>0<br>11 mm       | [633] |

|                          |        |                                                                                           |                        |                                                                                    |                                                                                                                                                                   |                                   |       |
|--------------------------|--------|-------------------------------------------------------------------------------------------|------------------------|------------------------------------------------------------------------------------|-------------------------------------------------------------------------------------------------------------------------------------------------------------------|-----------------------------------|-------|
| <i>Artemisia annua</i>   | Leaves | Chloroauric acid 5 mM/ plant extract 2 % (1:1 v/v)<br>Room temperature<br>10 min<br>pH NM | Triangular<br>15–40 nm | Diffusion<br>37°C<br>24 h<br>pH NM<br>Inoculum size NM<br>Ampicillin 100 mg/ml     | <i>E. coli</i> KCTC-1924<br><i>P. aeruginosa</i> KCTC-2004<br><i>Enterococcus aerogenes</i> KCTC-2190<br><i>S. aureus</i> KCTC-1916<br><i>B. cereus</i> KCTC-1012 | 18<br>10<br>16<br><br>18<br>23 mm | [634] |
| <i>Citrus maxima</i>     | Peel   | Chloroauric acid 1 mM/ plant extract 1% (10:1 v/v)<br>Room temperature<br>24 h<br>pH NM   | Spherical<br>8–25 nm   | Diffusion<br>37°C<br>24 h<br>pH NM<br>Inoculum size NM<br>Gentamicin**             | <i>S. aureus</i><br><i>E. coli</i>                                                                                                                                | NM<br>NM                          | [635] |
| <i>Bauhinia purpurea</i> | Leaves | Chloroauric acid 1 mM/ plant extract 25 % (10:1 v/v)<br>90°C<br>25 min<br>pH NM           | Nanorods<br>10–50 nm   | Diffusion<br>37°C<br>24–48 h<br>pH NM<br>Inoculum size NM<br>No control            | <i>S. aureus</i><br><i>B. subtilis</i><br><i>E. coli</i><br><i>P. aeruginosa</i>                                                                                  | 8<br>9<br>11<br>10                | [636] |
|                          |        |                                                                                           |                        | Diffusion<br>Room temperature<br>1 week<br>pH NM<br>Inoculum size NM<br>No control | <i>A. flavus</i><br><i>Aspergillus nidulans</i>                                                                                                                   | 8<br>11 mm                        |       |
|                          |        |                                                                                           |                        | Diffusion<br>37°C<br>1 week<br>pH NM<br>Inoculum size NM<br>No control             | <i>Aspergillus fumigatus</i><br><i>A. niger</i>                                                                                                                   | 10<br>12.5 mm                     |       |

|                              |         |                                                                                           |                                      |                                                                                                         |                                                                                                                                                                                                                                           |                                                                     |       |
|------------------------------|---------|-------------------------------------------------------------------------------------------|--------------------------------------|---------------------------------------------------------------------------------------------------------|-------------------------------------------------------------------------------------------------------------------------------------------------------------------------------------------------------------------------------------------|---------------------------------------------------------------------|-------|
| <i>Teraxacum officinale</i>  | Leaves  | Chloroauric acid 1 mM/ plant extract 10 % (19:1 v/v)<br>70°C<br>10 min<br>pH NM           | Cubic, spherical and rod<br>20–40 nm | Diffusion<br>37°C<br>24 h<br>pH NM<br>1×10 <sup>6</sup> CFU/ml<br>Penicillin**                          | <i>E. coli</i><br><i>S. aureus</i><br><i>B. subtilis</i><br><i>C. albicans</i><br><i>Saccharomyces cerevisiae</i>                                                                                                                         | 21<br>19<br>23<br>19<br>18 mm                                       | [637] |
| <i>Rhodomyrtus tomentosa</i> | Leaves  | Chloroauric acid 1 mM/ plant extract 10 % (1:1 v/v)<br>50°C<br>48 h<br>pH NM              | Spherical<br>10–20 nm                | Dilution<br>37°C<br>24 h<br>pH NM<br>Inoculum size NM<br>No control                                     | <i>S. aureus</i> ATCC 29213<br><i>E. coli</i> ATCC 25922                                                                                                                                                                                  | 31.25<br>500 µg/ml                                                  | [638] |
| <i>Euphrasia officinalis</i> | Leaves  | Chloroauric acid 1 mM/ plant extract 10 % (1:5 v/v)<br>65°C<br>3 h<br>pH NM               | Quasi-spherical<br>49 ± 1 nm         | Diffusion<br>28°C<br>24 h<br>pH NM<br>Inoculum size NM<br>No control                                    | <i>P. aeruginosa</i> KACC 14021<br><i>E. coli</i> CCARM 0237<br><i>S. aureus</i> KCTC 3881<br><i>Vibrio parahaemolyticus</i> KACC 15069                                                                                                   | 15<br>12<br>14<br>15 mm                                             | [639] |
| <i>Justicia glauca</i>       | Leaves  | Chloroauric acid 1 mM/ plant extract 3 % (1:1 v/v)<br>Room temperature<br>10 min<br>pH NM | Hexagonal and spherical<br>32 nm     | Dilution<br>37°C<br>24 h<br>pH NM<br>Inoculum size NM<br>Azitromycin 50 µg/ml<br>Claritromycin 50 µg/ml | <i>Micrococcus luteus</i><br><i>B. subtilis</i><br><i>S. aureus</i><br><i>Streptococcus mutans</i><br><i>Lactobacillus acidophilus</i><br><i>E. coli</i><br><i>P. aeruginosa</i><br><i>Saccharomyces cerevisiae</i><br><i>C. albicans</i> | 12.5<br>12.5<br>12.5<br>25<br>25<br>25<br>6.3<br>12.5<br>12.5 µg/ml | [640] |
| <i>Lonicera japonica</i>     | Flowers | Chloroauric acid 1 mM/ plant extract 10 % (19:1 v/v)<br>Room temperature<br>2 h           | Triangular<br>8 nm                   | Diffusion<br>37°C<br>24 h<br>pH NM<br>Inoculum size NM                                                  | <i>E. coli</i><br><i>B. subtilis</i><br><i>C. albicans</i><br><i>Saccharomyces cerevisiae</i>                                                                                                                                             | 21<br>17<br>19<br>15 mm                                             | [641] |

|                            |        |                                                                                             |                       |                                                                                  |                                                                 |                   |       |
|----------------------------|--------|---------------------------------------------------------------------------------------------|-----------------------|----------------------------------------------------------------------------------|-----------------------------------------------------------------|-------------------|-------|
|                            |        | pH NM                                                                                       |                       | Ampicillin**                                                                     |                                                                 |                   |       |
| <i>Solanum torvum</i>      | Fruit  | Chloroauric acid 1 mM/ plant extract 10 % (1:4 v/v)<br>Room temperature<br>24 h<br>pH NM    | Spherical<br>5–10 nm  | Diffusion<br>37°C<br>24 h<br>pH NM<br>Inoculum size NM<br>No control             | <i>E. coli</i><br><i>P. aeruginosa</i><br><i>B. subtilis</i>    | 12<br>11<br>10 mm | [642] |
| <i>Terminalia chebula</i>  | Seed   | Chloroauric acid 10 mM/ plant extract 10 % (1:100 v/v)<br>80°C<br>4 h<br>pH NM              | Spherical<br>6–60 nm  | Diffusion<br>37°C<br>24 h<br>pH NM<br>1×10 <sup>6</sup> CFU/ml<br>Neomycin 45 µg | <i>S. aureus</i> ATCC 25923<br><i>E. coli</i> ATCC 25922        | NM<br>NM          | [643] |
| <i>Salix alba</i>          | Leaves | Chloroauric acid 1 mM/ plant extract 10 % (15:1 v/v)<br>Room temperature<br>30 min<br>pH NM | Spherical<br>50–80 nm | Diffusion<br>37°C<br>18–24 h<br>pH NM<br>Inoculum size NM<br>Streptomycin**      | <i>K. pneumoniae</i><br><i>B. subtilis</i><br><i>S. aureus</i>  | 0<br>0<br>10      | [644] |
|                            |        |                                                                                             |                       | Diffusion<br>28°C<br>18–24 h<br>pH NM<br>Inoculum size NM<br>Miconazol**         | <i>Alternaria solani</i><br><i>A. niger</i><br><i>A. flavus</i> | 40<br>50<br>10 mm |       |
| <i>Hibiscus cannabinus</i> | Stem   | Chloroauric acid 1 mM/ plant extract 5 % (1:1 v/v)<br>Room temperature<br>5 min<br>pH NM    | Spherical<br>13 nm    | Diffusion<br>37°C<br>24 h<br>pH NM<br>Inoculum size NM<br>No control             | <i>S. aureus</i><br><i>P. aeruginosa</i>                        | 13<br>15 mm       | [645] |

|                              |         |                                                                                  |                                       |                                                                                                        |                                                                                     |                         |       |
|------------------------------|---------|----------------------------------------------------------------------------------|---------------------------------------|--------------------------------------------------------------------------------------------------------|-------------------------------------------------------------------------------------|-------------------------|-------|
| <i>Brassica oleracea</i>     | Leaves  | Chloroauric acid 1 mM/ plant extract 0.5 % (5:1 v/v)<br>45°C<br>24 h<br>pH NM    | Spherical<br>24–38 nm                 | Diffusion<br>37°C<br>24 h<br>pH NM<br>Inoculum size NM<br>No control                                   | <i>S. typhi</i><br><i>E. coli</i><br><i>S. aureus</i><br><i>B. subtilis</i>         | 9.5<br>9<br>8<br>6 mm   | [646] |
| <i>Solanum nigrum</i>        | Leaves  | Gold aurochlorate 1 mM/ plant extract 10 % (10:1 v/v)<br>85°C<br>24 h<br>pH NM   | Spherical<br>50 nm                    | Diffusion<br>37°C<br>24 h<br>pH NM<br>Inoculum size NM<br>No control                                   | <i>B. subtilis</i><br><i>S. aureus</i><br><i>E. coli</i><br><i>P. aeruginosa</i>    | 22<br>24<br>21<br>23 mm | [647] |
| <i>Gymnocladus assamicus</i> | Pod     | Chloroauric acid 0.5 mM/ plant extract 1 % (2:1 v/v)<br>60°C<br>1 h<br>pH NM     | Spherical<br>4–23 nm                  | Diffusion<br>37°C<br>24 h<br>pH NM<br>Inoculum size NM<br>No control                                   | <i>P.aeruginosa</i> MTCC 2453<br><i>S. aureus</i> MTCC 96                           | 23<br>24 mm             | [648] |
| <i>Carthamus tinctorius</i>  | Flowers | Chloroauric acid 2 mM/ plant extract 20 % (9:1 v/v)<br>60°C<br>3–4 h<br>pH NM    | Triangular and spherical<br>40–200 nm | Diffusion<br>37°C<br>24 h<br>pH NM<br>Inoculum size NM<br>Imipenem**<br>Norfloxacin**<br>Vancomycin ** | <i>E. coli</i><br><i>Streptobacillus spp</i><br><i>A. niger</i><br><i>A. flavus</i> | 30<br>21<br>0<br>30 mm  | [649] |
| <i>Embelia ribes</i>         | Seed    | Chloroauric acid 1 mM/ plant extract 10 % (10:1 v/v)<br>100°C<br>25 min<br>pH NM | Spherical<br>10–30 nm                 | Diffusion<br>37°C<br>24 h<br>pH NM<br>Inoculum size NM<br>No control                                   | <i>E. coli</i><br><i>S. aureus</i>                                                  | 28<br>22 mm             | [650] |

|                                |              |                                                                              |                       |                                                                                           |                                                                                                                                                                                                                                                                                              |                                                           |       |
|--------------------------------|--------------|------------------------------------------------------------------------------|-----------------------|-------------------------------------------------------------------------------------------|----------------------------------------------------------------------------------------------------------------------------------------------------------------------------------------------------------------------------------------------------------------------------------------------|-----------------------------------------------------------|-------|
| <i>Trianthema decandra</i>     | Roots        | Chloroauric acid 1 mM/ plant extract 20 % (1:1 v/v)<br>37°C<br>24 h<br>pH NM | Spherical<br>33–65 nm | Diffusion<br>37°C<br>24–48 h<br>pH NM<br>1×10 <sup>6</sup> CFU/ml<br>Chloramphenicol**    | <i>S. aureus</i> MTCC 29213<br><i>Streptococcus faecalis</i> MTCC 0459<br><i>Enterococcus faecalis</i> MTCC 2729<br><i>E. coli</i> MTCC 443<br><i>P. aeruginosa</i> MTCC 1035<br><i>Proteus vulgaris</i> MTCC 1771<br><i>B. subtilis</i> MTCC 121<br><i>Yersinia enterocolitica</i> MTCC 840 | 14.5<br>13.5<br>10<br>9.5<br>11.5<br>15<br>9.5<br>15.5 mm | [651] |
|                                |              |                                                                              |                       | Diffusion<br>37°C<br>24–48 h<br>pH NM<br>1×10 <sup>6</sup> CFU/ml<br>Nystatin**           | <i>C. albicans</i> MTCC 183                                                                                                                                                                                                                                                                  | 8.5 mm                                                    |       |
| <i>Rivea hypocrateriformis</i> | Aerial parts | Chloroauric acid 1 mM/ plant extract 5 % (5:2 v/v)<br>40°C<br>1 h<br>pH NM   | Spherical<br>20–30 nm | Diffusion<br>37°C<br>24 h<br>pH NM<br>1×10 <sup>6</sup> CFU/ml<br>Ciprofloxacin 100 µg/ml | <i>S. aureus</i> MTCC 7443<br><i>K. pneumoniae</i> MTCC 7407<br><i>E. coli</i> MTCC 7410<br><i>B. subtilis</i> MTCC 121<br><i>P. aeruginosa</i> MTCC 7903                                                                                                                                    | 8<br>7<br>9<br>9<br>6 mm                                  | [652] |
|                                |              |                                                                              |                       | Diffusion<br>37°C<br>24 h<br>pH NM<br>1×10 <sup>6</sup> CFU/ml<br>Fluconazole 100 µg/ml   | <i>C. albicans</i> MTCC 227<br><i>Chrysosporium indicum</i> MTCC 4266<br><i>Trichopyton rubrum</i> MTCC 296                                                                                                                                                                                  | 6<br>6<br>5 mm                                            |       |



|                        |        |                                                                                |                        |                                                                                                                                                        |                                                                               |                         |       |
|------------------------|--------|--------------------------------------------------------------------------------|------------------------|--------------------------------------------------------------------------------------------------------------------------------------------------------|-------------------------------------------------------------------------------|-------------------------|-------|
| <i>Jasminum sambac</i> | Leaves | Chloroauric acid 1 mM/ plant extract 5 % (5:1 v/v)<br>80°C<br>12 h<br>pH NM    | Spherical<br>20–50 nm  | Diffusion<br>37 °C<br>24–48 h<br>pH NM<br>1×10 <sup>8</sup> CFU/ml<br>Kanamycin 10 µg<br>Ampicillin 10 µg<br>Erythromycin 10 µg<br>Ciprofloxacin 10 µg | <i>S. aureus</i><br><i>E. coli</i><br><i>S. typhi</i><br><i>P. aeruginosa</i> | 18<br>26<br>24<br>21 mm | [653] |
|                        |        |                                                                                |                        | Diffusion<br>37 °C<br>24–48 h<br>pH NM<br>1×10 <sup>8</sup> CFU/ml<br>Fluconazol 10 µg<br>Imidazol 10 µg                                               | <i>Trichophyton rubrum</i><br><i>C. albicans</i><br><i>Candida indicum</i>    | 9<br>11<br>8 mm         |       |
| <i>Albizia amara</i>   | Leaves | Chloroauric acid 1 mM / plant extract 5 % (10:1 v/v)<br>30°C<br>2 h<br>pH NM   | Hexagonal<br>34–64 nm  | Diffusion<br>37 °C<br>24 h<br>pH 7.4<br>Inoculum size NM<br>Ciprofloxacin**                                                                            | <i>S. aureus</i> MTCC 96                                                      | 16 mm                   | [654] |
| <i>Ananas comosus</i>  | Peel   | Chloroauric acid 2 mM/ plant extract 20 % (2:5 v/v)<br>90°C<br>20 min<br>pH NM | Spherical<br>10 ± 5 nm | Diffusion<br>37°C<br>24 h<br>pH NM<br>Inoculum size NM<br>Ampicillin**<br>Penicillin**                                                                 | <i>E. coli</i><br><i>Streptobacillus spp</i>                                  | 14<br>17 mm             | [655] |
|                        |        |                                                                                |                        | Diffusion<br>37°C<br>48 h                                                                                                                              | <i>A. niger</i><br><i>A. flavus</i>                                           | 14<br>14 mm             |       |

|                                 |        |                                                                                             |                          |                                                                                                              |                                                                                             |                       |       |
|---------------------------------|--------|---------------------------------------------------------------------------------------------|--------------------------|--------------------------------------------------------------------------------------------------------------|---------------------------------------------------------------------------------------------|-----------------------|-------|
|                                 |        |                                                                                             |                          | pH NM<br>Inoculum size NM<br>No control                                                                      |                                                                                             |                       |       |
| <i>Achillea wilhelmsii</i>      | Leaves | Chloroauric acid 1 mM/ plant extract 5 % (9:1 v/v)<br>60°C<br>15 min<br>pH NM               | Spherical<br>2.7–38.7 nm | Diffusion<br>37°C<br>24 h<br>pH NM<br>1×10 <sup>8</sup> CFU/ml<br>Ampicillin**<br>Penicillin**<br>Bavistin** | <i>E. coli</i><br><i>Salmonella enterica</i><br><i>S. epidermidis</i><br><i>B. subtilis</i> | 0<br>0<br>10<br>11 mm | [656] |
| <i>Cerasus serrulata</i>        | Leaves | Chloroauric acid 0.5 mM/ plant extract 1 % (5:1 v/v)<br>Room temperature<br>20 min<br>pH NM | Spherical<br>5–25 nm     | Diffusion<br>37°C<br>24 h<br>pH NM<br>5×10 <sup>5</sup> CFU/ml<br>No control                                 | <i>E. coli</i><br><i>S. aureus</i>                                                          | 16<br>15 mm           | [657] |
| <i>Tamarindus indica</i>        | Seeds  | Chloroauric acid 1 mM/ plant extract 5 % (1:4 v/v)<br>Room temperature<br>24 h<br>pH NM     | Spherical<br>8 nm        | Diffusion<br>37°C<br>24 h<br>pH NM<br>5×10 <sup>5</sup> CFU/ml<br>Streptomycin**                             | <i>K. pneumoniae</i><br><i>B. subtilis</i><br><i>S. epidermidis</i>                         | 10<br>12<br>10 mm     | [658] |
| <i>Turnera diffusa</i>          | Leaves | Chloroauric acid 1 mM/ plant extract 1 % (9:1 v/v)<br>60°C<br>4 h<br>pH NM                  | Spherical<br>24 nm       | Diffusion<br>37°C<br>24 h<br>pH NM<br>Inoculum size NM<br>No control                                         | <i>Vibrio parahaemolyticus</i><br><i>Aeromonas hydrophila</i>                               | 15<br>17 mm           | [659] |
| <i>Cotoneaster horizontalis</i> | Leaves | Chloroauric acid 1 mM/ plant extract 10 % (7:5 v/v)                                         | Spherical<br>18 ± 2 nm   | Diffusion<br>37°C<br>24 h                                                                                    | <i>P. aeruginosa</i>                                                                        | 17 mm                 | [660] |

|                                 |        |                                                                                           |                        |                                                                                       |                                                                                                                                                                                                                                                                   |                                                            |       |
|---------------------------------|--------|-------------------------------------------------------------------------------------------|------------------------|---------------------------------------------------------------------------------------|-------------------------------------------------------------------------------------------------------------------------------------------------------------------------------------------------------------------------------------------------------------------|------------------------------------------------------------|-------|
|                                 |        | 37°C<br>24 h<br>pH NM                                                                     |                        | pH NM<br>Inoculum size NM<br>No control                                               |                                                                                                                                                                                                                                                                   |                                                            |       |
| <i>Combretum erythrophyllum</i> | Leaves | Chloroauric acid 1 mM/ plant extract 5 % (25:1 v/v)<br>90°C<br>1 h<br>pH NM               | Spherical<br>13.20 nm  | Dilution<br>37°C<br>24 h<br>pH NM<br>1×10 <sup>8</sup> CFU/ml<br>Streptomycin 1 mg/ml | <i>Staphylococcus epidermidis</i> ATCC 14990<br><i>S. aureus</i> ATCC 25923<br><i>Mycobacterium smegmatis</i> MC 215<br><i>Proteus mirabilis</i> ATCC 7002<br><i>E. coli</i> ATCC 25922<br><i>K. pneumoniae</i> ATCC 13822<br><i>Klebsiella oxytoca</i> ATCC 8724 | 62.5<br>62.5<br>62.5<br>62.5<br>62.5<br>62.5<br>62.5 µg/ml | [661] |
| <i>Tragopogon dubius</i>        | Leaves | Chloroauric acid 1 mM/ plant extract 10 % (10:1 v/v)<br>Room temperature<br>24 h<br>pH NM | Spherical<br>34 ± 3 nm | Diffusion<br>37°C<br>24 h<br>pH NM<br>Inoculum size NM<br>Tetracycline 30 µg          | <i>B. cereus</i> ATCC 14579<br><i>E. coli</i> ATCC 35218<br><i>S. aureus</i> ATCC 6538<br><i>K. pneumoniae</i> ATCC 700603                                                                                                                                        | 25<br>12.5<br>26<br>13 mm                                  | [662] |
| <i>Petroselinum crispum</i>     | Leaves | Chloroauric acid 1 mM/ plant extract 10 % (1:1 v/v)<br>90°C<br>20 min<br>pH NM            | Spherical<br>17 nm     | Diffusion<br>37°C<br>48 h<br>pH NM<br>Inoculum size NM<br>No control                  | <i>B. subtilis</i><br><i>Enterococcus faecalis</i><br><i>E. coli</i><br><i>Enterobacter ludwigii</i>                                                                                                                                                              | 0<br>0<br>4<br>3.2 mm                                      | [663] |
| <i>Pimenta dioica</i>           | Leaves | Chloroauric acid 1 mM/ plant extract 50 % (3:2 v/v)<br>30°C<br>24 h<br>pH NM              | Spherical<br>17 nm     | Diffusion<br>37°C<br>24 h<br>pH NM<br>Inoculum size NM<br>No control                  | <i>S. aureus</i><br><i>E. coli</i>                                                                                                                                                                                                                                | 4<br>9 mm                                                  | [664] |

|                             |          |                                                                                    |                       |                                                                                             |                                                                                                                         |                         |       |
|-----------------------------|----------|------------------------------------------------------------------------------------|-----------------------|---------------------------------------------------------------------------------------------|-------------------------------------------------------------------------------------------------------------------------|-------------------------|-------|
| <i>Morchella esculenta</i>  | Mushroom | Chloroauric acid 1 mM/ plant extract 20 % (5:1 v/v)<br>75°C<br>48 h<br>pH NM       | Spherical<br>16.51 nm | Dilution<br>37°C<br>24 h<br>pH NM<br>1×10 <sup>8</sup> CFU/ml<br>Vancomycin**<br>Colistin** | <i>S. aureus</i><br><i>B. subtilis</i><br><i>E. coli</i>                                                                | 0.4<br>0.9<br>0.2 µg/ml | [665] |
|                             |          |                                                                                    |                       | Dilution<br>37°C<br>24 h<br>pH NM<br>1×10 <sup>8</sup> CFU/ml<br>Fluconazole**              | <i>C. albicans</i>                                                                                                      | 0.1 µg/ml               |       |
| <i>Cynodon dactylon</i>     | Leaves   | Chloroauric acid 1 mM/ plant extract 1 % (4:1 v/v)<br>Room<br>2 h<br>pH NM         | Spherical<br>21.33 nm | Diffusion<br>37°C<br>24 h<br>pH NM<br>5×10 <sup>6</sup> CFU/ml<br>Ciprofloxacin**           | <i>Enterobacter cloacae</i><br><i>Staphylococcus haemolyticus</i><br><i>Staphylococcus petrasii</i><br><i>B. cereus</i> | 13<br>12<br>13<br>12 mm | [666] |
| <i>Peganum harmala</i>      | Leaves   | Chloroauric acid/ plant extract 2 % (1:50 w/v)<br>Room temperature<br>2 h<br>pH NM | Spherical<br>43 nm    | Diffusion<br>37°C<br>24 h<br>pH NM<br>Inoculum size NM<br>Cefoxitin**<br>Chloramphenicol**  | <i>E. coli</i><br><i>S. aureus</i>                                                                                      | 25<br>30 mm             | [667] |
| <i>Rhazya stricta decne</i> | Leaves   | Chloroauric acid 2 mM/ plant extract 12 % (5:1 v/v)<br>24°C<br>4 h<br>pH NM        | Spherical<br>40 nm    | Diffusion<br>37 °C<br>24 h<br>pH NM<br>Inoculum size NM<br>No control                       | <i>E. coli</i><br><i>B. subtilis</i>                                                                                    | 18<br>12 mm             | [668] |

|                            |        |                                                                                 |                               |                                                                          |                                                                                                                                     |                               |       |
|----------------------------|--------|---------------------------------------------------------------------------------|-------------------------------|--------------------------------------------------------------------------|-------------------------------------------------------------------------------------------------------------------------------------|-------------------------------|-------|
| <i>Actinidia deliciosa</i> | Fruit  | Chloroauric acid 1 mM/ plant extract 10 % (9:1 v/v)<br>80°C<br>1 h<br>pH NM     | Spherical<br>25–40 nm         | Diffusion<br>37°C<br>24 h<br>pH NM<br>Inoculum size NM<br>No control     | <i>P. aeruginosa</i>                                                                                                                | NM                            | [669] |
| <i>Angelica pubescens</i>  | Roots  | Chloroauric acid 5 mM/ plant extract 5 % (2:1 v/v)<br>80°C<br>50 min<br>pH NM   | Spherical<br>7 nm             | Diffusion<br>37°C<br>24 h<br>pH NM<br>Inoculum size NM<br>Neomycin 30 µg | <i>E. coli</i> ATCC 10798<br><i>S. aureus</i> ATCC 6538<br><i>P. aeruginosa</i> ATCC 27853<br><i>Salmonella enterica</i> ATCC 13076 | 14<br>17<br>13<br>12 mm       | [670] |
| <i>Prunus armeniaca</i>    | Gum    | Chloroauric acid 1 mM/ plant extract 0.5 % (8:5 v/v)<br>80°C<br>10 min<br>pH NM | Spherical<br>5–40 nm          | Diffusion<br>37°C<br>24 h<br>pH NM<br>Inoculum size NM<br>Streptomycin** | <i>S. aureus</i> ATCC 25923<br><i>E. coli</i> ATCC 25922<br><i>P. aeruginosa</i> ATCC 27853                                         | 10<br>9<br>8 mm               | [671] |
| <i>Senna siamea</i>        | Seed   | Chloroauric acid 2 mM/ plant extract 16 % (5:2 v/v)<br>70°C<br>3 h<br>pH NM     | Nearly triangular<br>50–70 nm | Diffusion<br>37°C<br>24 h<br>pH NM<br>Inoculum size NM<br>No control     | <i>S. aureus</i><br><i>B. subtilis</i><br><i>P. aeruginosa</i><br><i>K. pneumoniae</i><br><i>E. coli</i>                            | 13<br>18<br>15<br>21<br>15 mm | [672] |
| <i>Ginkgo biloba</i>       | Leaves | Chloroauric acid 1 mM/ plant extract 33 % (2:5 v/v)<br>40°C<br>12 h<br>pH NM    | Spherical<br>10–30 nm         | Diffusion<br>37°C<br>24 h<br>pH NM<br>Inoculum size NM<br>No control     | <i>Agrobacterium tumefaciens</i><br><i>B. subtilis</i><br><i>E. coli</i>                                                            | 15<br>19<br>19 mm             | [673] |

|                               |        |                                                                                           |                       |                                                                                                     |                                                                                                                                                                                                                                 |                                     |       |
|-------------------------------|--------|-------------------------------------------------------------------------------------------|-----------------------|-----------------------------------------------------------------------------------------------------|---------------------------------------------------------------------------------------------------------------------------------------------------------------------------------------------------------------------------------|-------------------------------------|-------|
| <i>Ficus benghalensis</i>     | Leaves | Chloroauric acid 1 mM/ plant extract 10 % (2:1 v/v)<br>30°C<br>5–7 min<br>pH NM           | Spherical<br>20 nm    | Diffusion<br>37°C<br>24 h<br>pH NM<br>Inoculum size NM<br>No control                                | <i>E. coli</i><br><i>B. subtilis</i><br><i>S. aureus</i><br><i>K. pneumonia</i>                                                                                                                                                 | 12<br>8<br>16<br>10 mm              | [674] |
| <i>Evolvulus alsinoides</i>   | Leaves | Chloroauric acid 1 mM/ plant extract 10 % (9:1 v/v)<br>60°C<br>15 min<br>pH NM            | Spherical<br>80 nm    | Diffusion<br>37°C<br>24–48 h<br>pH NM<br>Inoculum size NM<br>Methicillin 10 µg<br>Itraconazol 10 µg | <i>Aeromonas liquefaciens</i> MTCC 2645<br><i>Enterococcus faecalis</i> MTCC 439<br><i>K. pneumoniae</i> NCIM 2883<br><i>Micrococcus luteus</i> NCIM 2871<br><i>S. typhimurium</i> NCIM 2501<br><i>Vibrio cholera</i> MTCC 3906 | 13<br>17<br>16<br>18<br>14<br>15 mm | [675] |
|                               |        |                                                                                           |                       | Diffusion<br>25°C<br>48–72 h<br>pH NM<br>Inoculum size NM<br>Itraconazol 10 µg                      | <i>C. albicans</i> MTCC 1637<br><i>Cryptococcus spp</i> MTCC 7076<br><i>Microsporum canis</i> MTCC 3270<br><i>Trichophyton rubrum</i> MTCC 3272                                                                                 | 10<br>9<br>9<br>7 mm                |       |
| <i>Abelmoschus esculentus</i> | Seed   | Chloroauric acid 1 mM/ plant extract 2 % (3:2 v/v)<br>Room temperature<br>10 min<br>pH NM | Spherical<br>45–75 nm | Diffusion<br>25°C<br>72 h<br>pH NM<br>Inoculum size NM<br>Amphotericin B**                          | <i>Puccinia graminis</i><br><i>A. flavus</i><br><i>A. niger</i><br><i>C. albicans</i>                                                                                                                                           | 17<br>15<br>16<br>18 mm             | [676] |
| <i>Rumex hymenosepalus</i>    | Roots  | Tetrachlauric acid 10 mM/ plant extract 1 % (1:1 v/v)<br>Room temperature<br>1 h<br>pH NM | Spherical<br>24 nm    | Dilution<br>37°C<br>24 h<br>pH NM<br>1×10 <sup>8</sup> CFU/ml<br>No control                         | <i>E. coli</i> ATCC 25922<br><i>S. aureus</i> ATCC 5538                                                                                                                                                                         | 50<br>50 µg/ml                      | [677] |

|                               |         |                                                                                                               |                       |                                                                                                   |                                                                                                                                 |                         |       |
|-------------------------------|---------|---------------------------------------------------------------------------------------------------------------|-----------------------|---------------------------------------------------------------------------------------------------|---------------------------------------------------------------------------------------------------------------------------------|-------------------------|-------|
| <i>Capsicum annuum</i>        | Fruits  | Tetrachloroauric acid<br>5 mM/ plant extract 8<br>% (5:1 v/v)<br>Room temperature<br>Incubation time<br>pH NM | Spherical<br>35.1 nm  | Diffusion<br>37°C<br>48 h<br>pH NM<br>Inoculum size NM<br>Chloramphenicol**<br>Difloxacin**       | <i>Pasteurella multocida</i><br><i>Klebsiella rhinoscleromatis</i><br><i>Streptococcus pyogenes</i><br><i>Vibrio vulnificus</i> | 32<br>28<br>18<br>33 mm | [678] |
| <i>Asparagus racemosus</i>    | Roots   | Tetrachloroauric acid<br>1 mM/ plant extract<br>10 % (10:1 v/v)<br>Room temperature<br>24 h<br>pH NM          | Spherical<br>10–50 nm | Diffusion<br>37°C<br>24 h<br>pH NM<br>1×10 <sup>5</sup> CFU/ml<br>Gentamycin**<br>Streptomycin ** | <i>P. aeruginosa</i> ATCC 27853<br><i>S. aureus</i> ATCC 25923                                                                  | 26<br>23 mm             | [679] |
| <i>Euphorbia hirta</i>        | Leaves  | Chloroauric acid 1<br>mM/ plant extract 10<br>% (1:1 v/v)<br>37°C<br>5 min<br>pH NM                           | Spherical<br>6–71 nm  | Dilution<br>37°C<br>24 h<br>pH NM<br>Inoculum size NM<br>No control                               | <i>E. coli</i><br><i>P. aeruginosa</i><br><i>K. pneumoniae</i>                                                                  | 88<br>86<br>94 %        | [680] |
| <i>Acorus calamus</i>         | Rhizome | Chloroauric acid 1<br>mM/ plant extract 30<br>% (1:1 v/v)<br>100°C<br>15 min<br>pH 4                          | Spherical<br>10 nm    | Dilution<br>37°C<br>24–48 h<br>pH NM<br>Inoculum size NM<br>No control                            | <i>S. aureus</i> MTCC 96<br><i>E. coli</i> MTCC 1671                                                                            | 63<br>80 %              | [681] |
| <i>Chenopodium formosanum</i> | Shell   | Chloroauric acid 1<br>mM/ plant extract 1 %<br>(1:2 v/v)<br>25°C<br>1 h<br>pH NM                              | Spherical<br>8 ± 6 nm | Dilution<br>37°C<br>18 h<br>pH NM<br>1×10 <sup>6</sup> CFU/ml<br>Streptomycin 40 µg               | <i>E. coli</i><br><i>S. aureus</i>                                                                                              | 85<br>60 %              | [682] |

|                           |         |                                                                                                 |                       |                                                                             |                                                                                                                                                                          |                                           |       |
|---------------------------|---------|-------------------------------------------------------------------------------------------------|-----------------------|-----------------------------------------------------------------------------|--------------------------------------------------------------------------------------------------------------------------------------------------------------------------|-------------------------------------------|-------|
| <i>Avicennia marina</i>   | Seeds   | Chloroauric acid<br>1mM/ plant extract 20<br>% (20:1 v/v)<br>40°C<br>24 h<br>pH NM              | Spherical<br>10-15 nm | Dilution<br>35°C<br>24 h<br>pH NM<br>Inoculum size NM<br>Neomycin**         | <i>E. coli</i><br><i>K. pneumoniae</i><br><i>S. aureus</i><br><i>P. aeruginosa</i><br><i>Enterococcus faecalis</i>                                                       | 200<br>200<br>200<br>200 µg/ml<br>NM      | [683] |
| <i>Chenopodium quinoa</i> | Seed    | Chloroauric acid 5<br>mM/ plant extract 4 %<br>(1:4 v/v)<br>82°C<br>30 min<br>pH NM             | Spherical<br>5.5 nm   | Dilution<br>37°C<br>24 h<br>pH NM<br>1×10 <sup>6</sup> CFU/ml<br>No control | <i>E. coli</i> ATCC 25972<br><i>S. aureus</i> ATCC 1901                                                                                                                  | 99<br>98 %                                | [684] |
| <i>Acer pentapomicum</i>  | Leaves  | Chloroauric acid 1<br>mM/ plant extract 10<br>% (10:1 v/v)<br>Room temperature<br>24 h<br>pH NM | Spherical<br>19–24 nm | Diffusion<br>37°C<br>24 h<br>pH NM<br>Inoculum size NM<br>No control        | <i>B. subtilis</i><br><i>Citrobacter freundii</i><br><i>E. coli</i><br><i>K. pneumoniae</i><br><i>P. aeruginosa</i><br><i>S. aureus</i><br><i>Xanthomonas compestris</i> | 27<br>42<br>38<br>81<br>40<br>38<br>32 mm | [685] |
| <i>Panax ginseng</i>      | Berries | Gold (III) chloride 1<br>mM/ plant extract 6 %<br>(1:1 v/v)<br>80°C<br>30 min                   | Spherical<br>5-10 nm  | Diffusion<br>37°C<br>24 h<br>pH NM<br>Inoculum size NM<br>Neomycin**        | <i>E. coli</i><br><i>S. aureus</i>                                                                                                                                       | 11<br>12.3 mm                             | [686] |
| <i>Clitoria ternatea</i>  | Leaves  | Chloroauric acid 1<br>mM / plant extract 20<br>%<br>(2:5 v/v)<br>Room temperature               | Rod<br>100 nm         | Diffusion<br>37°C<br>24 h<br>pH NM<br>Inoculum size NM                      | <i>S. aureus</i><br><i>S. epidermidis</i><br><i>E. coli</i><br><i>P. aeruginosa</i>                                                                                      | NM                                        | [687] |



|                             |              |                                                                                           |                                              |                                                                              |                                                                                                                                                                             |                            |       |
|-----------------------------|--------------|-------------------------------------------------------------------------------------------|----------------------------------------------|------------------------------------------------------------------------------|-----------------------------------------------------------------------------------------------------------------------------------------------------------------------------|----------------------------|-------|
|                             |              | 24 h                                                                                      |                                              | No control                                                                   |                                                                                                                                                                             |                            |       |
| <i>Pleurotus ostreatus</i>  | Basidiocarps | Chloroauric acid 1 mM/plant extract 8 % (5:1 v/v)<br>Room temperature<br>20 min           | Spherical<br>22.9 nm                         | Diffusion<br>37°C<br>24 h<br>pH NM<br>Inoculum size NM<br>Tetracycline**     | <i>Enterococcus faecalis</i> ATCC 29212<br><i>E. coli</i> ATCC 25922<br><i>K. pneumonia</i> ATCC 700603<br><i>P. aeruginosa</i> ATCC 254992<br><i>S. aureus</i> ATCC 254996 | 0<br>0<br>0<br>29<br>12 mm | [688] |
|                             |              |                                                                                           |                                              | Diffusion<br>37°C<br>48 h<br>pH NM<br>Inoculum size NM<br>Fluconazole**      | <i>C. albicans</i> ATCC 10231                                                                                                                                               | 32 mm                      |       |
| <i>Cajanus cajan</i>        | Leaves       | Chloroauric acid 1 mM/ plant extract 10 % (9:1 v/v)<br>60°C<br>10 min<br>pH NM            | Spherical<br>1-100 nm                        | Diffusion<br>37°C<br>24 h<br>pH NM<br>1×10 <sup>2</sup> CFU/ml<br>No control | <i>Bacillus spp</i><br><i>Pseudomonas spp</i>                                                                                                                               | 33<br>29 mm                | [689] |
| <i>Terminalia bellirica</i> | Fruit        | Chloroauric acid 1 mM/ plant extract 5 % (9:1 v/v)<br>Room temperature<br>20 min<br>pH NM | Spherical, triangular, hexagonal<br>20-30 nm | Diffusion<br>37°C<br>18 h<br>pH NM<br>Inoculum size NM<br>No control         | <i>E. coli</i>                                                                                                                                                              | 14 mm                      | [690] |
|                             |              |                                                                                           |                                              | Diffusion<br>37°C<br>72 h<br>pH NM<br>Inoculum size NM<br>No control         | <i>C. albicans</i><br><i>Candida tropicalis</i>                                                                                                                             | 16<br>13 mm                |       |

|                           |        |                                                                                          |                       |                                                                                 |                                                                                  |                       |       |
|---------------------------|--------|------------------------------------------------------------------------------------------|-----------------------|---------------------------------------------------------------------------------|----------------------------------------------------------------------------------|-----------------------|-------|
| <i>Achyranthes aspera</i> | Leaves | Chloroauric acid 1 mM/ plant extract 10 % (1:1 v/v)<br>Room temperature<br>24 h<br>pH NM | Spherical<br>18 nm    | Diffusion<br>37°C<br>24 h<br>pH NM<br>Inoculum size NM<br>No control            | <i>Streptococcus mutans</i>                                                      | 18.5 mm               | [691] |
| <i>Plumbago zeylanica</i> | Leaves | Chloroauric acid 1 mM/ plant extract 2 % (1:1 v/v)<br>Room<br>24 h<br>pH NM              | Spherical<br>16.89 nm | Diffusion<br>37°C<br>16–18 h<br>pH NM<br>Inoculum size NM<br>Netilmicin**       | <i>E. coli</i><br><i>P. aeruginosa</i><br><i>B. subtilis</i><br><i>S. aureus</i> | 8<br>11<br>12<br>8 mm | [692] |
|                           |        |                                                                                          |                       | Diffusion<br>35°C<br>48 h<br>pH NM<br>Inoculum size NM<br>Fluconazole**         | <i>Candida tropicalis</i><br><i>A. flavus</i>                                    | 8<br>0 mm             |       |
| <i>Carica papaya</i>      | Leaves | Chloroauric acid 1 mM/ plant extract 1 % (1:4 v/v)<br>55°C<br>30 min<br>pH NM            | Spherical<br>15±2 nm  | Diffusion<br>37°C<br>24 h<br>pH NM<br>1×10 <sup>8</sup> CFU/ml<br>Ampicillin**  | <i>S. aureus</i><br><i>Pseudomonas putida</i>                                    | NM<br>NM              | [693] |
| <i>Garcinia kola</i>      | Pulp   | Chloroauric acid 1 mM/ plant extract 20 % (4:1 v/v)<br>Room<br>4 h<br>pH NM              | Spherical<br>28 nm    | Diffusion<br>37°C<br>22 h<br>pH NM<br>1×10 <sup>8</sup> CFU/ml<br>Amoxicillin** | <i>P. aeruginosa</i><br><i>E. coli</i><br><i>S. aureus</i><br><i>B. cereus</i>   | 11<br>12<br>4<br>7 mm | [694] |

|                              |         |                                                                                |                      |                                                                                     |                                                                                                                              |                              |       |
|------------------------------|---------|--------------------------------------------------------------------------------|----------------------|-------------------------------------------------------------------------------------|------------------------------------------------------------------------------------------------------------------------------|------------------------------|-------|
| <i>Terminalia arjuna</i>     | Leaves  | Chloroauric acid 1 mM/ plant extract 5 % (20:1 v/v)<br>60°C<br>30 min<br>pH NM | Spherical<br>20 nm   | Diffusion<br>37°C<br>24 h<br>pH NM<br>Inoculum size NM<br>No control                | <i>S. aureus</i> NCIM 5021<br><i>P. aeruginosa</i> NCIM 5029<br><i>Salmonella typhimurium</i> NCIM 2501                      | 20<br>18<br>16 mm            | [695] |
| <i>Populus alba</i>          | Leaves  | Chloroauric acid 1 mM/ plant extract 5 % (9:1 v/v)<br>85°C<br>15 min<br>pH NM  | Spherical<br>16.3 nm | Dilution<br>37°C<br>24 h<br>pH NM<br>Inoculum size NM<br>No control                 | <i>S. aureus</i><br><i>E. coli</i>                                                                                           | 100<br>100 µg/ml             | [696] |
| <i>Curcuma pseudomontana</i> | Rhizome | Chloroauric acid 1 mM/ plant extract 1 % (20:1 v/v)<br>Room<br>30 min<br>pH NM | Spherical<br>16.3 nm | Diffusion<br>37°C<br>24 h<br>pH NM<br>1×10 <sup>8</sup> CFU/ml<br>Streptomycin**    | <i>S. aureus</i><br><i>E. coli</i><br><i>B. subtilis</i><br><i>P. aeruginosa</i>                                             | 25<br>28<br>26<br>23 mm      | [697] |
| <i>Allium ampeloprasum</i>   | Leaves  | Chloroauric acid 1 mM/ plant extract 10 % (10:1 v/v)<br>80°C<br>48 h<br>pH NM  | Spherical<br>96 nm   | Dilution<br>37°C<br>24 h<br>pH NM<br>Inoculum size NM<br>Colistin**<br>Vancomycin** | <i>E. coli</i> ATCC 25922<br><i>S. aureus</i> ATCC 29213<br><i>B. subtilis</i> ATCC 11774<br><i>P. aeruginosa</i> ATCC 27853 | 0.5<br>0.1<br>0.3<br>1 mg/ml | [698] |
|                              |         |                                                                                |                      | Dilution<br>37°C<br>24 h<br>pH NM<br>Inoculum size NM<br>Fluconazole**              | <i>C. albicans</i>                                                                                                           | 0.1 mg/ml                    |       |

|                            |        |                                                                                 |                    |                                                                             |                                                                                                                                      |                               |       |
|----------------------------|--------|---------------------------------------------------------------------------------|--------------------|-----------------------------------------------------------------------------|--------------------------------------------------------------------------------------------------------------------------------------|-------------------------------|-------|
| <i>Glycyrrhiza glabra</i>  | Roots  | Chloroauric acid 1 mM/ plant extract 2 % (6:1 v/v)<br>25°C<br>2.5 h<br>pH 5     | Spherical<br>55 nm | Diffusion<br>37°C<br>24 h<br>pH NM<br>Inoculum size NM<br>Norfloxacin**     | <i>B. subtilis</i><br><i>S. aureus</i><br><i>E. coli</i><br><i>P. aeruginosa</i><br><i>S. typhi</i>                                  | 25<br>26<br>29<br>25<br>26 mm | [699] |
|                            |        |                                                                                 |                    | Diffusion<br>37°C<br>72 h<br>pH NM<br>Inoculum size NM<br>Nystatin**        | <i>A. niger</i><br><i>C. albicans</i><br><i>Fusarium oxysporum</i><br><i>A. flavus</i><br><i>Penicillium citrinum</i>                | 14<br>17<br>16<br>18<br>19 mm |       |
| <i>Viola betonicifolia</i> | Leaves | Chloroauric acid 1 mM / plant extract 15 % (1:1 v/v)<br>40°C<br>60 min<br>pH NM | Spherical<br>13 nm | Dilution<br>37°C<br>24 h<br>pH NM<br>1×10 <sup>5</sup> CFU/ml<br>No control | <i>S. aureus</i> ATCC 23235<br><i>B. subtilis</i> ATCC 6051<br><i>E. coli</i> ATCC 25922<br><i>P. aeruginosa</i> ATCC 27853          | 89<br>87<br>92<br>93 %        | [700] |
|                            |        |                                                                                 |                    | Dilution<br>30°C<br>24 h<br>pH NM<br>1×10 <sup>5</sup> CFU/ml<br>No control | <i>C. albicans</i> ATCC 10231<br><i>Aspergillus fumigatus</i> ATCC 13073<br><i>A. flavus</i> ATCC 9643<br><i>A. niger</i> ATCC 11414 | 69<br>76<br>85<br>70 %        |       |

\*MIC=minimal inhibition concentration; ZOI=zone of inhibition; PI=percentage of inhibition

\*\*The quantity or concentration is not mentioned.

NM=not mentioned, MRSA=methicillin-resistant *S. aureus*

Table S3. Antimicrobial green synthesized zinc (oxide) nanoparticles

| Plant type                   | Part used | Operative conditions for synthesis                                       | NP characteristics (shape and size)        | Microbiological analyses (operative conditions)                                                                                     |                                                                                                                                                             |                                    | Ref.  |
|------------------------------|-----------|--------------------------------------------------------------------------|--------------------------------------------|-------------------------------------------------------------------------------------------------------------------------------------|-------------------------------------------------------------------------------------------------------------------------------------------------------------|------------------------------------|-------|
|                              |           |                                                                          |                                            | Methods, incubation temperature, incubation time, pH, inoculum density, positive control                                            | Tested bacteria                                                                                                                                             | MIC, ZOI or PI*                    |       |
| <i>Veronica multifida</i>    | Leaves    | Zinc acetate/ plant extract 2 % (1:100 w/v)<br>50 °C<br>15 min<br>pH 12  | Hexagonal and quasi-spherical<br>10–100 nm | Diffusion<br>35°C<br>16–20 h<br>pH NM<br>1.5×10 <sup>8</sup> CFU/ml<br>Penicillin G 10 mg<br>Gentamicin 10 mg<br>Tetracycline 30 mg | <i>E. coli</i> ATCC 43895<br><i>S. aureus</i> ATCC 29213<br><i>B. subtilis</i><br><i>Bacillus licheniformis</i><br><i>P. aeruginosa</i><br><i>S. typhi</i>  | 12<br>8<br>15<br>13<br>15<br>14 mm | [701] |
| <i>Geranium wallichianum</i> | Leaves    | Zinc nitrate 1 mM/ plant extract 4 % (3:50 w/v)<br>60 °C<br>3 h<br>pH 12 | Hexagonal<br>18 nm                         | Diffusion<br>37°C<br>24 h<br>pH NM<br>Inoculum size NM<br>Oxytetracycline 10 µg                                                     | <i>B. subtilis</i> ATCC 6633<br><i>S. aureus</i> ATCC 25923<br><i>P. aeruginosa</i> ATCC 9721<br><i>E. coli</i> ATCC15224<br><i>K. pneumoniae</i> ATCC 4617 | 30<br>18<br>22<br>10<br>15 mm      | [702] |

|                               |        |                                                                                    |                       |                                                                                       |                                                                                                                                                                |                               |       |
|-------------------------------|--------|------------------------------------------------------------------------------------|-----------------------|---------------------------------------------------------------------------------------|----------------------------------------------------------------------------------------------------------------------------------------------------------------|-------------------------------|-------|
|                               |        |                                                                                    |                       | Diffusion<br>28°C<br>48 h<br>pH NM<br>Inoculum size NM<br>Amphotericin B**            | <i>A. flavus</i> FCBP 0064<br><i>A. niger</i> FCBP 0918<br><i>C. albicans</i> FCBP 478<br><i>Fusarium solani</i> FCBP 0291<br><i>Mucor racemosus</i> FCBP 0300 | 10<br>20<br>12<br>10<br>14 mm |       |
| <i>Pelargonium graveolens</i> | Leaves | Zinc acetate/ plant<br>extract 10 % (1:1<br>w/v)<br>100°C<br>20 min<br>pH NM       | Spherical<br>60–80 nm | Diffusion<br>37°C<br>24 h<br>pH NM<br>2×10 <sup>5</sup> CFU/ml<br>Amoxycillin**       | <i>E. coli</i><br><i>S. aureus</i>                                                                                                                             | 18<br>12 mm                   | [703] |
| <i>Capsicum annuum</i>        | Fruit  | Zinc acetate 5<br>mM/ plant extract<br>2 % (4 :1 v/v)<br>450 °C<br>30 min<br>pH NM | Hexagonal<br>30–40 nm | Diffusion<br>35 ± 1 °C<br>36 h<br>pH NM<br>5×10 <sup>6</sup> CFU/ml<br>Gentamicin**   | <i>E. coli</i> MTCC 443<br><i>S. aureus</i> MTCC 5823                                                                                                          | 8<br>6 mm                     | [704] |
|                               |        |                                                                                    |                       | Diffusion<br>28 ± 1°C<br>72 h<br>pH NM<br>3×10 <sup>5</sup> CFU/ml<br>Fluconazol**    | <i>Humicola fuscoatra</i> MTCC 3938                                                                                                                            | 4 mm                          |       |
| <i>Periploca aphylla</i>      | Plant  | Zinc acetate/ plant<br>extract 12.5 %<br>(1:50 w/v)<br>45 °C<br>25 h<br>pH NM      | Spherical<br>6 nm     | Diffusion<br>37°C<br>24 h<br>pH NM<br>1.5×10 <sup>8</sup> CFU/ml<br>Cefixime 20 µg/ml | <i>E. coli</i> ATCC 2340<br><i>Serratia marcescens</i> ATCC 43297<br><i>Enterobacter cloacae</i> ATCC 2341                                                     | 23<br>19<br>24.5 mm           | [705] |
| <i>Citrullus colocynthis</i>  | Fruit  | Zinc nitrate/ plant<br>extract 10 % (3:5<br>w/v)<br>100 °C<br>8 min                | Hexagonal<br>27–85 nm | Diffusion<br>37°C<br>24 h<br>pH NM<br>Inoculum size NM                                | <i>B. subtilis</i><br>MRSA<br><i>P. aeruginosa</i><br><i>E. coli</i>                                                                                           | 14.3<br>7<br>12.2<br>13.4 mm  | [706] |

|                            |        |                                                                             |                    |                                                                         |                                                                                                                                                                                                |                                         |       |
|----------------------------|--------|-----------------------------------------------------------------------------|--------------------|-------------------------------------------------------------------------|------------------------------------------------------------------------------------------------------------------------------------------------------------------------------------------------|-----------------------------------------|-------|
|                            |        | pH NM                                                                       |                    | No control                                                              |                                                                                                                                                                                                |                                         |       |
| <i>Catharanthus roseus</i> | Leaves | Zinc acetate 10 mM/ plant extract 12 % (50:1 v/v) 40°C 30 min pH 12         | Spherical 62–94 nm | Diffusion 30°C 24h pH NM 1×10 <sup>8</sup> CFU/ml Streptomycin 10 µg/ml | <i>S. aureus</i> MTCC 9760<br><i>B. cereus</i> MTCC 430<br><i>P. aeruginosa</i> MTCC 424<br><i>P. mirabilis</i> MTCC 3310<br><i>E. coli</i> MTCC 40<br><i>Streptococcus pyogenes</i> MTCC 1926 | 12<br>11.5<br>11<br>11<br>11<br>11.5 mm | [707] |
| <i>Hibiscus subdariffa</i> | Leaves | Zinc acetate 91 mM /20 ml of plant extract 5 % (5:2 v/v) 50 °C 10 min pH 10 | Spherical 10–60 nm | Dilution 37°C 24 h pH 7 1×10 <sup>7</sup> CFU/ml No control             | <i>E. coli</i> MTCC 1652<br><i>S. aureus</i> MTCC 96                                                                                                                                           | 50<br>50 µg/ml                          | [708] |
| <i>Moringa oleifera</i>    | Leaves | Zinc nitrate/ plant extract 20 % (1:5 w/v) 60–80 °C 1 h pH NM               | Spherical 16–20 nm | Diffusion 37°C 24 h pH NM Inoculum size NM Ciprofloxacin 5 µg           | <i>S. aureus</i><br><i>B. substilis</i><br><i>P. aeruginosa</i><br><i>Proteus mirabis</i><br><i>E.coli</i>                                                                                     | 22.5<br>21.5<br>20<br>19<br>20 mm       | [709] |
|                            |        |                                                                             |                    | Diffusion 28–35°C 24h pH NM Inoculum size NM Amphotercin B 10 µg        | <i>C. albicans</i><br><i>Candida tropicalis</i>                                                                                                                                                | 20<br>18 mm                             |       |
| <i>Solanum nigrum</i>      | Leaves | Zinc nitrate /plant extract 20 % (1:10 w/v) 60°C 2 h pH NM                  | Spherical 20–30 nm | Diffusion 37°C 18–24 h pH NM Inoculum size NM No control                | <i>S. aureus</i><br><i>Salmonella paratyphi</i><br><i>Vibrio cholerae</i><br><i>E. coli</i>                                                                                                    | 18<br>17<br>11<br>7 mm                  | [710] |

|                               |        |                                                                             |                              |                                                                                                                                                 |                                                                                                                                                                                                                      |                                                     |       |
|-------------------------------|--------|-----------------------------------------------------------------------------|------------------------------|-------------------------------------------------------------------------------------------------------------------------------------------------|----------------------------------------------------------------------------------------------------------------------------------------------------------------------------------------------------------------------|-----------------------------------------------------|-------|
| <i>Petroselinum crispum</i>   | Leaves | Zinc acetate/ plant extract 10 % (1:10 w/v)<br>90°C<br>72 h<br>pH NM        | Spherical<br>40–50 nm        | Diffusion<br>37°C<br>24 h<br>pH NM<br>Inoculum size NM<br>No control                                                                            | <i>E. coli</i>                                                                                                                                                                                                       | 4.3 mm                                              | [711] |
| <i>Sarcopoterium spinosum</i> | Leaves | Zinc nitrate 1 mM/ plant extract 3 % (1:1 v/v)<br>60°C<br>2 h<br>pH 10      | Spherical<br>26–115 nm       | Dilution<br>37°C<br>24 h<br>pH 10<br>Inoculum size NM<br>Ampicillin**                                                                           | <i>E. coli</i> ATCC 25922<br><i>P. aeruginosa</i> ATCC 27853<br><i>S. aureus</i> ATCC 25925<br><i>B. subtilis</i> ATCC 6633<br><i>Enterococcus faecalis</i> ATCC 29212<br><i>Streptococcus pneumoniae</i> ATCC 10353 | 62.5<br>125<br>125<br>62.5<br>62.5<br><br>125 µg/ml | [712] |
|                               |        |                                                                             |                              | Dilution<br>28°C<br>24 h<br>pH 10<br>Inoculum size NM<br>Fluconazol**                                                                           | <i>Candida glabrata</i> ATCC 4322<br><i>C. albicans</i> ATCC 90028                                                                                                                                                   | 31.3<br>31.3 µg/ml                                  |       |
| <i>Couroupita guianensis</i>  | Leaves | Zinc acetate 25 mM/ plant extract 5 % (25:2 v/v)<br>70°C<br>10 min<br>pH NM | Hexagonal<br>1–100 nm        | Diffusion<br>37°C<br>24 h<br>pH NM<br>Inoculum size NM<br>No control                                                                            | <i>B. cereus</i><br><i>K. pneumoniae</i><br><i>E. coli</i><br><i>Micrococcus luteus</i><br><i>S. typhi</i><br><i>Vibrio cholerae</i>                                                                                 | 17<br>18<br>19<br>15<br>18<br>19 mm                 | [713] |
| <i>Nephelium lappaceum</i>    | Peel   | Zinc nitrate 100 mM/ plant extract 10 % (1:10 v/v)<br>80°C<br>2 h<br>pH 12  | Needle nanocrystals<br>50 nm | Diffusion<br>37°C<br>24 h<br>pH NM<br>Inoculum size NM<br>Ampicillin 10 µg<br>Gentamicin 10 µg<br>Nalidixic acid 30 µg<br>Chloromphenicol 30 µg | <i>E. coli</i> ATCC 11632<br><i>S. aureus</i> ATCC 10536                                                                                                                                                             | 18<br>23 mm                                         | [714] |



|                              |        |                                                                                |                       |                                                                                                                                                                   |                                                                                                                               |                         |       |
|------------------------------|--------|--------------------------------------------------------------------------------|-----------------------|-------------------------------------------------------------------------------------------------------------------------------------------------------------------|-------------------------------------------------------------------------------------------------------------------------------|-------------------------|-------|
|                              |        |                                                                                |                       | Cefalexin 30 µg<br>Co trimoxazole 25 µg<br>Penicillin G 10 µg<br>Vancomycin 30 µg<br>Ampicillin 10 µg<br>Oxacillin 1 µg<br>Erythromycin 15 µg<br>Methicillin 5 µg |                                                                                                                               |                         |       |
| <i>Rosa canina</i>           | Fruit  | Zinc nitrate 50 mM/ plant extract<br>10 % (1:2 v/v)<br>150°C<br>5 h<br>pH 6    | Spherical<br>50 nm    | Diffusion<br>37°C<br>24 h<br>pH NM<br>Inoculum size NM<br>No control                                                                                              | <i>E. coli</i><br><i>Salmonella typhimurium</i><br><i>Listeria monocytogenes</i><br><i>S. aureus</i>                          | 8<br>00<br>10<br>11 mm  | [715] |
| <i>Terminalia arjuna</i>     | Bark   | Zinc acetate 1000 mM/ plant extract<br>10 % (1:10 v/v)<br>80°C<br>8 h<br>pH NM | Spherical<br>21 nm    | Diffusion<br>37°C<br>18–24 h<br>pH NM<br>Inoculum size NM<br>No control                                                                                           | <i>S. aureus</i> ATCC 6538<br><i>E. coli</i> ATCC 9677                                                                        | 22.5<br>24 mm           | [716] |
| <i>Glycosmis pentaphylla</i> | Leaves | Zinc acetate 200 mM/ plant extract<br>10 % (1:2 v/v)<br>60°C<br>1 h<br>pH NM   | Hexagonal<br>32–36 nm | Diffusion<br>37°C<br>24–48 h<br>pH NM<br>Inoculum size NM<br>Ciprofloxacin 5 µg                                                                                   | <i>Shigella dysenteriae</i><br><i>B. cereus</i> MTCC 430<br><i>Salmonella paratyphi</i> MTCC 735<br><i>S. aureus</i> MTCC 737 | 42<br>41<br>40<br>22 mm | [717] |
|                              |        |                                                                                |                       | Diffusion<br>30°C<br>72–96h<br>pH NM<br>Inoculum size NM<br>Nystatin 50 µg                                                                                        | <i>C. albicans</i> MTCC 227<br><i>A.niger</i> MTCC 281                                                                        | 34<br>20 mm             |       |

|                            |        |                                                                               |                       |                                                                                                                  |                                                                                                                                                                      |                                    |       |
|----------------------------|--------|-------------------------------------------------------------------------------|-----------------------|------------------------------------------------------------------------------------------------------------------|----------------------------------------------------------------------------------------------------------------------------------------------------------------------|------------------------------------|-------|
| <i>Adhatoda vasica</i>     | Leaves | Zinc acetate 100 mM/ plant extract<br>5 % (5:1 v/v)<br>100°C<br>1 h<br>pH10   | Hexagonal<br>10–12 nm | Dilution<br>37°C<br>24h<br>pH NM<br>1×10 <sup>8</sup> CFU/ml<br>Streptomycin 10 µg                               | <i>S. epidermidis</i> MTCC 435<br><i>E. coli</i> MTCC 443<br><i>P. aeruginosa</i> MTCC 741<br><i>Staphylococcus spp</i><br><i>Streptococcus spp</i>                  | 16<br>16<br>128<br>32<br>128µg/ml  | [718] |
|                            |        |                                                                               |                       | Dilution<br>25°C<br>72 h<br>pH NM<br>1×10 <sup>6</sup> CFU/ml<br>Fluconazole 10 µg                               | <i>Aspergillus fumigatus</i> MTCC 6594<br><i>Trichophyton rubrum</i> MTCC 296<br><i>Microsporum audouinii</i> MTCC 8197<br><i>Fusarium spp</i><br><i>Candida spp</i> | 32<br>64<br>256<br>64<br>256 µg/ml |       |
| <i>Euphorbia petiolata</i> | Leaves | Zinc nitrate 1000 mM/ plant extract<br>10 % (5:3 v/v)<br>80°C<br>2 h<br>pH NM | Hexagonal<br>10–12 nm | Diffusion<br>37°C<br>24 h<br>pH NM<br>Inoculum size NM<br>Chloramphenicol**                                      | <i>E. coli</i>                                                                                                                                                       | 12 mm                              | [719] |
| <i>Punica granatum</i>     | Peel   | Zinc nitrate/ plant extract 16 %<br>(1:25 w/v)<br>80°C<br>1 h<br>pH 5         | Hexagonal<br>20± 5 nm | Diffusion<br>37°C<br>24 h<br>pH NM<br>1×10 <sup>5</sup> CFU/ml<br>Streptomycin**<br>Gentamicin**                 | MRSA 33591<br><i>Proteus vulgaris</i> ATCC 49132<br><i>E. coli</i> K12                                                                                               | 6<br>8<br>9.5 mm                   | [720] |
| <i>Swertia chirayita</i>   | Leaves | Zinc nitrate 7 mM/ plant extract<br>3.5 % (1:5 v/v)<br>80°C<br>24 h<br>pH NM  | Spherical<br>10 nm    | Diffusion<br>35±2 °C<br>24h<br>pH NM<br>Inoculum size NM<br>Tetracycline 5 µg/50 ml<br>Ciprofloxacin 20 µg/50 ml | <i>S. aureus</i> ATCC 6538<br><i>E. coli</i> ATCC 8739<br><i>Salmonella enterica</i> MTCC 3858                                                                       | 14<br>23<br>16 mm                  | [721] |

|                                 |        |                                                                               |                                     |                                                                                  |                                                                                                                                              |                               |       |
|---------------------------------|--------|-------------------------------------------------------------------------------|-------------------------------------|----------------------------------------------------------------------------------|----------------------------------------------------------------------------------------------------------------------------------------------|-------------------------------|-------|
| <i>Chelidonium majus</i>        | Leaves | Zinc nitrate/ plant extract 1.5 % (1:10 w/v)<br>90°C<br>4 h<br>pH NM          | Spherical<br>10 nm                  | Dilution<br>34±1 °C<br>18 h<br>pH NM<br>1×10 <sup>6</sup> CFU/ml<br>Amikacin**   | <i>S. aureus</i> ACTC 4163<br><i>E. coli</i> ATCC 25922<br><i>P. aeruginosa</i> NCTC 6749                                                    | 40<br>80<br>120 µg/ml         | [722] |
|                                 |        |                                                                               |                                     | Dilution<br>34±1 °C<br>72 h<br>pH NM<br>2×10 <sup>6</sup> CFU/ml<br>Nystatin**   | <i>C. albicans</i> ATCC 10231<br><i>A. niger</i> ATCC 16404<br><i>Trichophyton rubrum</i> ATCC 28188                                         | 120<br>80<br>120 µg/ml        |       |
| <i>Prunus yedoensis</i>         | Leaves | Zinc nitrate 100 mM/ plant extract<br>25 % (5:1 v/v)<br>80°C<br>8 h<br>pH NM  | Spherical or oval<br>10–40 nm       | Diffusion<br>37°C<br>24 h<br>pH NM<br>Inoculum size NM<br>Penicillin G 10 µg     | <i>S. epidermidis</i> KACC 13234<br><i>Brevibacterium linens</i> KACC 14346                                                                  | 24<br>26 mm                   | [723] |
| <i>Sechium edule</i>            | Leaves | Zinc acetate 5 mM/ plant extract<br>8 % (4 :1 v/v)<br>60°C<br>2 h<br>pH NM    | Spherical<br>36 nm                  | Diffusion<br>37°C<br>24 h<br>pH NM<br>1×10 <sup>4</sup> CFU/ml<br>Streptomycin** | <i>B. subtilis</i><br><i>K. pneumoniae</i>                                                                                                   | 12<br>14 mm                   | [724] |
| <i>Parthenium hysterophorus</i> | Leaves | Zinc nitrate 1 mM/ plant extract<br>10 % (1:9 v/v)<br>18°C<br>15 min<br>pH NM | Spherical and hexagonal<br>27–84 nm | Diffusion<br>37°C<br>24 h<br>pH NM<br>Inoculum size NM<br>Norfloxacin**          | <i>S. aureus</i><br><i>B. subtilis</i><br><i>K. pneumoniae</i><br><i>E. coli</i><br><i>Enterobacter aerogenes</i>                            | 11<br>10<br>14<br>20<br>36 mm | [725] |
| <i>Ruta graveolens</i>          | Stem   | Zinc nitrate 100 mM/ plant extract<br>1 % (9:1 v/v)<br>60°C<br>4–5 h          | Spherical<br>20–30 nm               | Diffusion<br>37°C<br>36 h<br>pH NM<br>Inoculum size NM                           | <i>Klebsiella aerogenes</i> NCIM 2098<br><i>E. coli</i> NCIM 5051<br><i>S. aureus</i> NCIM 5022<br><i>Pseudomonas desmolyticum</i> NCIM 2028 | 2.3<br>2.7<br>6.3<br>3.7 mm   | [726] |

|                            |         |                                                                               |                              |                                                                                    |                                                                                                                                                                             |                                               |       |
|----------------------------|---------|-------------------------------------------------------------------------------|------------------------------|------------------------------------------------------------------------------------|-----------------------------------------------------------------------------------------------------------------------------------------------------------------------------|-----------------------------------------------|-------|
|                            |         | pH 12                                                                         |                              | Ciprofloxacin 5 µg/50 ml                                                           |                                                                                                                                                                             |                                               |       |
| <i>Coptidis rhizoma</i>    | Rhizome | Zinc nitrate 5 mM/ plant extract<br>10 % (1:1 v/v)<br>37°C<br>1 h<br>pH NM    | Rod and spherical<br>3–25 nm | Diffusion<br>37°C<br>24 h<br>pH NM<br>Inoculum size NM<br>No control               | <i>Bacillus megaterium</i><br><i>Bacillus pumilis</i><br><i>E. coli</i><br><i>B. cereus</i>                                                                                 | 10<br>9<br>11<br>9 mm                         | [332] |
| <i>Bauhinia tomentosa</i>  | Leaves  | Zinc sulfate 2 mM/ plant extract<br>10 % (4:1 v/v)<br>60°C<br>4 days<br>pH NM | Hexagonal<br>22–94 nm        | Diffusion<br>37°C<br>24 h<br>pH NM<br>Inoculum size NM<br>Levofloxacin**           | <i>P. aeruginosa</i><br><i>E. coli</i><br><i>B. subtilis</i><br><i>S. aureus</i>                                                                                            | 20<br>20<br>8<br>11 mm                        | [727] |
| <i>Cassia fistula</i>      | Leaves  | Zinc nitrate 1 mM/ plant extract<br>10 % (1:10 v/v)<br>100°C<br>5 h<br>pH NM  | Irregular<br>5–15 nm         | Diffusion<br>37°C<br>36 h<br>pH NM<br>Inoculum size NM<br>Ciprofloxacin 5 mg/50 ml | <i>Klebsiella aerogenes</i> NCIM 2098<br><i>E. coli</i> NCIM 5051<br><i>S. aureus</i> NCIM 5022<br><i>Pseudomonas desmolyticum</i> NCIM 2028                                | 10<br>5<br>5<br>4 mm                          | [728] |
| <i>Berberis aristata</i>   | Leaves  | Zinc acetate 100 mM/ plant extract<br>10 % (1:6 v/v)<br>70°C<br>8 h<br>pH 12  | Spherical<br>5–25 nm         | Diffusion<br>37°C<br>24 h<br>pH NM<br>Inoculum size NM<br>Ciprofloxacin**          | <i>E. coli</i><br><i>K. pneumoniae</i><br><i>S. aureus</i><br><i>B. cereus</i><br><i>B. subtilis</i><br><i>Serratia marcescens</i><br><i>Proteus spp</i><br><i>S. typhi</i> | 13<br>15<br>18<br>19<br>26<br>25<br>0<br>0 mm | [729] |
| <i>Passiflora caerulea</i> | Leaves  | Zinc acetate 1 mM/ plant extract<br>20 % (2:1 v/v)<br>60°C<br>1 h<br>pH 12    | Spherical<br>37 nm           | Diffusion<br>37°C<br>24 h<br>pH NM<br>Inoculum size NM<br>Ampicillin**             | <i>Klebsiella spp</i><br><i>Enterococcus spp</i><br><i>E.coli</i><br><i>Streptococcus spp</i>                                                                               | 11<br>9.3<br>13<br>11.7 mm                    | [730] |

|                           |        |                                                               |                    |                                                                          |                                                                                                                                                                                                |                                         |       |
|---------------------------|--------|---------------------------------------------------------------|--------------------|--------------------------------------------------------------------------|------------------------------------------------------------------------------------------------------------------------------------------------------------------------------------------------|-----------------------------------------|-------|
| <i>Vitex trifolia</i>     | Leaves | Zinc nitrate/ plant extract 10 % (1:20 w/v) 60–80°C 2 h pH NM | Spherical 30 nm    | Diffusion 37°C 24 h pH NM Inoculum size NM Ciprofloxacin 5 µg            | <i>S. aureus</i><br><i>B. subtilis</i><br><i>P. aeruginosa</i><br><i>Proteus mirabilis</i><br><i>E. coli</i>                                                                                   | 22.5<br>21.5<br>19.8<br>19.3<br>20.1 mm | [731] |
|                           |        |                                                               |                    | Diffusion 28–35°C 24 h pH NM Inoculum size NM Amphotericin B 10 µg       | <i>C. albicans</i><br><i>Candida tropicalis</i>                                                                                                                                                | 20.3<br>17.8 mm                         |       |
| <i>Cinnamomum verum</i>   | Bark   | Zinc nitrate/ plant extract 50 % (1:10 w/v) 45–50°C 2 h pH NM | Spherical 10–30 nm | Diffusion 37°C 24 h pH NM 1.5×10 <sup>8</sup> CFU/ml Streptomycin 25 µg  | <i>S. aureus</i> MTCC 7443<br><i>E. coli</i> MTCC 7410                                                                                                                                         | 16.8<br>13.3 mm                         | [732] |
| <i>Limonia acidissima</i> | Leaves | Zinc nitrate**/ plant extract 10 % (19:1 v/v) 80°C 72 h pH 10 | Spherical 12–53 nm | Diffusion 37°C 5 days pH NM 1×10 <sup>6</sup> CFU/ml Erythromycin 15 µg  | <i>S. aureus</i> MTCC 3160<br><i>B. cereus</i> MTCC 8733<br><i>Enterococcus faecalis</i> ATCC 35550<br><i>E. coli</i> MTCC 433<br><i>S. typhi</i> MTCC 3216<br><i>P. aeruginosa</i> ATCC 25619 | 15.2<br>0<br>0<br>0<br>15.5<br>13.3 mm  | [733] |
| <i>Rhamnus virgata</i>    | Leaves | Zinc nitrate/ plant extract 12 % (3:50 w/v) 25°C 24 h pH NM   | Hexagonal 20–30 nm | Diffusion 37°C 24 h pH NM 1×10 <sup>8</sup> CFU/ml Oxytetracycline 10 µg | <i>E. coli</i> ATCC 15224<br><i>S. aureus</i> ATCC 25923<br><i>B. subtilis</i> ATCC 6633<br><i>K. pneumoniae</i> ATCC 4617<br><i>P. aeruginosa</i> ATCC 9721                                   | 24<br>18<br>25<br>15<br>14 mm           | [734] |
|                           |        |                                                               |                    | Diffusion 28°C 48 h pH NM                                                | <i>C. albicans</i> FCBP 478<br><i>Mucor racemosus</i> FCBP 0300<br><i>A. niger</i> FCBP 0918<br><i>Fusarium solani</i> FCBP 0291                                                               | 22<br>27<br>25<br>24                    |       |

|                            |         |                                                                            |                                          |                                                                                 |                                                                                                                                                                 |                                                    |       |
|----------------------------|---------|----------------------------------------------------------------------------|------------------------------------------|---------------------------------------------------------------------------------|-----------------------------------------------------------------------------------------------------------------------------------------------------------------|----------------------------------------------------|-------|
|                            |         |                                                                            |                                          | 1×10 <sup>8</sup> CFU/ml<br>Amphotericin B 10 µg                                | <i>A. flavus</i> FCBP 0064                                                                                                                                      | 19 mm                                              |       |
| <i>Cassia auriculata</i>   | Flowers | Zinc nitrate/ plant extract 5 % (1:10 w/v)<br>40°C<br>2 h<br>pH NM         | Hexagonal<br>50–80 nm                    | Diffusion<br>37°C<br>24 h<br>pH NM<br>Inoculum size NM<br>Tetracycline 10 µg/ml | <i>E. coli</i><br><i>B. subtilis</i><br><i>K. pneumonia</i><br><i>S. aureus</i><br><i>S. typhi</i>                                                              | 13<br>17<br>16<br>19<br>13 mm                      | [735] |
| <i>Emblica officinalis</i> | Fruit   | Zinc nitrate 100 mM/ plant extract 25 % (1:5 v/v)<br>80°C<br>2 h<br>pH 6   | Hexagonal<br>35 nm                       | Diffusion<br>37°C<br>24 h<br>pH NM<br>Inoculum size NM<br>Ciprofloxacin 25 µg   | <i>B. subtilis</i><br><i>Streptococcus pneumoniae</i><br><i>S. epidermidis</i><br><i>K. pneumoniae</i><br><i>S. typhi</i><br><i>E. coli</i>                     | 18<br>16<br>29<br>15<br>15<br>17 mm                | [736] |
|                            |         |                                                                            |                                          | Diffusion<br>28°C<br>72 h<br>pH NM<br>Inoculum size NM<br>Fluconazol 25 µg      | <i>A. niger</i><br><i>C. albicans</i>                                                                                                                           | 0<br>0 mm                                          |       |
| <i>Jatropha curcas</i>     | Seed    | Zinc acetate 500 mM/ plant extract 10 % (1:3 v/v)<br>60°C<br>1 h<br>pH NM  | Hexagonal<br>53 nm                       | Dilution<br>37°C<br>12 h<br>pH NM<br>Inoculum size NM<br>No control             | <i>S. aureus</i> ATCC 6538P<br><i>S. epidermidis</i> ATCC 12228<br><i>E. coli</i> ATCC 4157<br><i>K. pneumoniae</i> ATCC 9621                                   | 62.5<br>62.5<br>31.3<br>31.3 µg/ml                 | [737] |
| <i>Aloe vera</i>           | Leaves  | Zinc sulfate 250 mM/ plant extract 10 % (1:4 v/v)<br>60 °C<br>3 h<br>pH 10 | Spherical, oval and hexagonal<br>8–18 nm | Dilution<br>37°C<br>24 h<br>pH NM<br>Inoculum size NM<br>No control             | <i>E. coli</i> ESBL 336<br><i>E. coli</i> ATCC 25922<br><i>P. aeruginosa</i> ESBL 621<br><i>P. aeruginosa</i> ATCC 27853<br>MRSA<br><i>S. aureus</i> ATCC 95923 | 2000<br>2200<br>2300<br>2200<br>2000<br>2200 µg/ml | [422] |
| <i>Rubia cardifolia</i>    | Root    | Zinc nitrate 25 mM/ plant extract 5 % (9:1 v/v)                            | Decahedral<br>14–18 nm                   | Diffusion<br>37°C<br>24h                                                        | <i>Vibrio parahaemolyticus</i><br><i>Plesiomonas shigelloides</i><br><i>Shigella spp</i>                                                                        | 6<br>16<br>14                                      | [738] |

|                                 |        |                                                                                  |                     |                                                                                               |                                                                                                                              |                                 |       |
|---------------------------------|--------|----------------------------------------------------------------------------------|---------------------|-----------------------------------------------------------------------------------------------|------------------------------------------------------------------------------------------------------------------------------|---------------------------------|-------|
|                                 |        | 60–70°C<br>10–15 min<br>pH NM                                                    |                     | pH NM<br>1.5×10 <sup>8</sup> CFU/ml<br>No control                                             | <i>P. aeruginosa</i><br><i>Vibrio alginolyticus</i>                                                                          | 10<br>12 mm                     |       |
| <i>Cochlospermum religiosum</i> | Leaves | Zinc nitrate/ plant<br>extract 10 %<br>(1:10 w/v)<br>60–80°C<br>2 h<br>pH NM     | Hexagonal<br>76 nm  | Diffusion<br>37 ± 2 °C<br>24 h<br>pH NM<br>1.5×10 <sup>8</sup> CFU/ml<br>Streptomycin**       | <i>B. subtilis</i> MTCC 121<br><i>S. aureus</i> MTCC 744<br><i>E. coli</i> MTCC 7410<br><i>S. typhi</i> MTCC 733             | 20.1<br>22.2<br>20.3<br>19.4 mm | [739] |
| <i>Viola canescens</i>          | Leaves | Zinc nitrate 1<br>mM/ plant extract<br>5 % (1:1 v/v)<br>60°C<br>4 h<br>pH NM     | Hexagonal<br>26 nm  | Diffusion<br>37°C<br>24 h<br>pH NM<br>Inoculum size NM<br>Amoxicillin**                       | <i>S. aureus</i><br><i>E. coli</i>                                                                                           | 10.3<br>7.3 mm                  | [740] |
| <i>Vaccinium arctostaphylos</i> | Fruit  | Zinc acetate 200<br>mM/ plant extract<br>10 % (2:1 v/v)<br>60°C<br>24 h<br>pH 10 | Spherical<br>12 nm  | Diffusion<br>37°C<br>48 h<br>pH NM<br>1×10 <sup>7</sup> CFU/ml<br>No control                  | <i>S. aureus</i> PTCC 1189<br><i>E. coli</i> PTCC 1047                                                                       | 12<br>15 mm                     | [267] |
| <i>Musa acuminata</i>           | Peel   | Zinc nitrate/ plant<br>extract 5 % (1:50<br>w/v)<br>80°C<br>2h<br>pH NM          | Hexagonal<br>350 nm | Diffusion<br>37°C<br>24 h<br>pH NM<br>Inoculum size NM<br>No control                          | <i>S. aureus</i>                                                                                                             | 19 mm                           | [741] |
| <i>Aristolochia indica</i>      | Leaves | Zinc nitrate/ plant<br>extract 20 %<br>(1:20 w/v)<br>100°C<br>2 h<br>pH NM       | Spherical<br>22 nm  | Dilution<br>37°C<br>24 h<br>pH NM<br>5 × 10 <sup>5</sup> CFU/ml<br>Vancomycin**<br>Colistin** | <i>S. aureus</i> ATCC 29213<br><i>P. aeruginosa</i> ATCC 27853<br><i>E. faecalis</i> ATCC 29212<br><i>E. coli</i> ATCC 25922 | 100<br>100<br>100<br>200 µg/ml  | [742] |

|                                   |        |                                                                     |                       |                                                                        |                                                                                                             |                         |       |
|-----------------------------------|--------|---------------------------------------------------------------------|-----------------------|------------------------------------------------------------------------|-------------------------------------------------------------------------------------------------------------|-------------------------|-------|
| <i>Nigella sativa</i>             | Seed   | Zinc nitrate 50 mM/ plant extract 20 % (10 :1 v/v) 45°C 72 h pH 8   | Hexagonal 20 nm       | Diffusion 37°C 24 h pH NM Inoculum size NM Azithromycin 2 µg/ml        | <i>Chromobacterium violaceum</i><br><i>P. aeruginosa</i><br><i>E. coli</i><br><i>Listeria monocytogenes</i> | 32<br>40<br>38<br>14 mm | [70]  |
| <i>Azolla pinnata</i>             | Leaves | Zinc nitrate 100 mM / plant extract 10 % (10:1 v/v) 100°C 2 h pH 12 | Spherical 12–20 nm    | Diffusion 37°C 24 h pH NM Inoculum size NM No control                  | <i>S. aureus</i>                                                                                            | 4 mm                    | [336] |
| <i>Justicia adhatoda</i>          | Leaves | Zinc nitrate 1 mM/ plant extract 10 % (1:5 w/v) 80°C 10 min pH 10   | Spherical 55–83 nm    | Diffusion 37°C 24h pH NM Inoculum size NM No control                   | <i>S. aureus</i><br><i>E.coli</i>                                                                           | 19<br>21 mm             | [743] |
| <i>Melia dubia</i>                | Leaves | Zinc acetate 100 mM/ plant extract 10 % (2:1 v/v) 60°C 2 h pH NM    | Hexagonal 13 nm       | Diffusion 37°C 24 h pH NM Inoculum size NM No control                  | <i>S. aureus</i> ATCC25933<br><i>E. coli</i> ATCC25922                                                      | 7<br>8 mm               | [744] |
| <i>Mentha pulegium</i>            | Leaves | Zinc nitrate/ plant extract 5 % (1:10 w/v) 60–80°C 2 h pH NM        | Quasi-spherical 40 nm | Diffusion 37 °C 24 h pH NM 1×10 <sup>6</sup> CFU/ml Ciprofloxacin 5 µg | <i>S. aureus</i> ATCC 25923<br><i>E. coli</i> ATCC 25922                                                    | 23<br>19 mm             | [301] |
| <i>Tabernaemontana divaricata</i> | Leaves | Zinc nitrate/ plant extract 20 % (1:10 w/v) 80°C                    | Spherical 20–50 nm    | Diffusion 37 °C 24 h pH NM                                             | <i>Salmonella paratyphi</i><br><i>E. coli</i><br><i>S. aureus</i>                                           | NM<br>NM<br>NM          | [302] |



|                            |        |                                                                                  |                       |                                                                                                                                                                                                                                                                                                                                                                                                                                                                       |                                                                      |                         |       |
|----------------------------|--------|----------------------------------------------------------------------------------|-----------------------|-----------------------------------------------------------------------------------------------------------------------------------------------------------------------------------------------------------------------------------------------------------------------------------------------------------------------------------------------------------------------------------------------------------------------------------------------------------------------|----------------------------------------------------------------------|-------------------------|-------|
|                            |        | 2 h<br>pH NM                                                                     |                       | Inoculum size NM<br>No control                                                                                                                                                                                                                                                                                                                                                                                                                                        |                                                                      |                         |       |
| <i>Lavandula vera</i>      | Leaves | Zinc sulfate 1<br>mM/ plant extract<br>10 % (4:1 v/v)<br>80°C<br>30 min<br>pH NM | Spherical<br>30–80 nm | Dilution<br>37°C<br>24 h<br>pH NM<br>1×10 <sup>5</sup> CFU/ml<br>Tobramycin 10 µg<br>Nalidixic acid 30 µg<br>Ceftriaxone 30 µg<br>Ciprofloxacin 5 µg<br>Bacitracin 0.04 unit<br>Vancomycin 30 µg<br>Cephalexin 30 µg<br>Cefixime 5 µg<br>Gentamicin 10 µg<br>Tetracycline 30 µg<br>Amikacin 30 µg<br>Streptomycin 10 µg<br>Amoxicillin 25 µg<br>Cloxacillin 5 µg<br>Erythromycin 15 µg<br>Methicillin 5 µg<br>Imipenem 10 µg<br>Azithromycin 15 µg<br>Kanamycin 30 µg | <i>S. aureus</i><br><i>P. aeruginosa</i><br><i>Proteus mirabilis</i> | 2.6<br>2.6<br>2.6 µg/ml | [745] |
| <i>Pelargonium zonale</i>  | Leaves | Zinc oxide/ plant<br>extract 10 %<br>(1:10 w/v)<br>150°C<br>2h<br>pH NM          | Hexagonal<br>61 nm    | Diffusion<br>37°C<br>24 h<br>pH NM<br>Inoculum size NM<br>No control                                                                                                                                                                                                                                                                                                                                                                                                  | <i>S. aureus</i><br><i>E. coli</i>                                   | 15<br>10 mm             | [746] |
| <i>Ailanthus altissima</i> | Fruit  | Zinc nitrate 5<br>mM/ plant extract<br>1 % (1:1 v/v)                             | Spherical<br>5–40 nm  | Diffusion<br>37°C<br>24 h                                                                                                                                                                                                                                                                                                                                                                                                                                             | <i>E. coli</i><br><i>S. aureus</i>                                   | 16<br>20 mm             | [747] |

|                                |        |                                                                                   |                                 |                                                                                   |                                                                                                                                                             |                                     |       |
|--------------------------------|--------|-----------------------------------------------------------------------------------|---------------------------------|-----------------------------------------------------------------------------------|-------------------------------------------------------------------------------------------------------------------------------------------------------------|-------------------------------------|-------|
|                                |        | 80°C<br>4 h<br>pH NM                                                              |                                 | pH NM<br>Inoculum size NM<br>Chloramphenicol**                                    |                                                                                                                                                             |                                     |       |
| <i>Sutherlandia frutescens</i> | Leaves | Zinc nitrate/ plant<br>extract 10 %<br>(2:25 w/v)<br>80°C<br>2 h<br>pH NM         | Spherical<br>5–25 nm            | Dilution<br>37°C<br>24 h<br>pH NM<br>Inoculum size NM<br>No control               | <i>S. aureus</i><br><i>E. faecalis</i><br><i>E. coli</i>                                                                                                    | 0.3<br>1.3<br>2.5 mg/ml             | [292] |
| <i>Mirabilis jalapa</i>        | Leaves | Zinc acetate 500<br>mM/ plant extract<br>10 % (1:1 v/v)<br>60°C<br>2 h<br>pH NM   | Spherical<br>13–33 nm           | Diffusion<br>37°C<br>24 h<br>pH NM<br>1×10 <sup>6</sup> CFU/ml<br>Roxithromycin** | <i>S. aureus</i> ATCC 6538<br><i>B. subtilis</i> ATCC 6633<br><i>E. coli</i> ATCC 15224<br><i>P. aeruginosa</i> ATCC 9721<br><i>K. pneumoniae</i> ATCC 4619 | 18<br>25<br>17<br>20<br>21 mm       | [748] |
| <i>Albizia lebbbeck</i>        | Stem   | Zinc nitrate 10<br>mM / plant<br>extract 20 % (9:1<br>v/v)<br>60°C<br>5h<br>pH 12 | Irregular<br>spherical<br>66 nm | Diffusion<br>37°C<br>24 h<br>pH NM<br>Inoculum size NM<br>Ciprofloxacin 10 µg     | <i>B. cereus</i> ATCC 7064<br><i>S. aureus</i> 6538 P<br><i>E. coli</i> O157 H7<br><i>K. pneumoniae</i> ATCC 27738<br><i>S. typhi</i> B 4420                | 8.8<br>4.5<br>9.1<br>7.3<br>10.6 mm | [749] |
| <i>Ocimum tenuiflorum</i>      | Leaves | Zinc nitrate/ plant<br>extract 10 %<br>(1:10 w/v)<br>60–80°C<br>2h<br>pH NM       | Hexagonal<br>14–28 nm           | Diffusion<br>37°C<br>24 h<br>pH NM<br>Inoculum size NM<br>Ciprofloxacin 10 µg     | <i>S. aureus</i><br><i>P. aeruginosa</i><br><i>E. coli</i>                                                                                                  | 13<br>18<br>17 mm                   | [750] |
| <i>Costus pictus</i>           | Leaves | Zinc nitrate 100<br>mM/ plant extract<br>8 % (5:1 v/v)<br>80°C<br>4h<br>pH NM     | Hexagonal<br>20–40 nm           | Diffusion<br>37°C<br>24 h<br>pH NM<br>Inoculum size NM<br>Ciprofloxacin 10 µg     | <i>S. aureus</i><br><i>B. subtilis</i><br><i>E. coli</i><br><i>Salmonella paratyphi</i>                                                                     | 10<br>17<br>10<br>12 mm             | [751] |

|                                 |         |                                                                                 |                       |                                                                              |                                                                                                                                        |                                    |       |
|---------------------------------|---------|---------------------------------------------------------------------------------|-----------------------|------------------------------------------------------------------------------|----------------------------------------------------------------------------------------------------------------------------------------|------------------------------------|-------|
|                                 |         |                                                                                 |                       | Diffusion<br>37°C<br>24 h<br>pH NM<br>Inoculum size NM<br>Fluconazol 10 µg   | <i>C. albicans</i><br><i>A. niger</i>                                                                                                  | 12<br>16 mm                        |       |
| <i>Lagenaria siceraria</i>      | Leaves  | Zinc nitrate/ plant<br>extract 10 %<br>(3:50 w/v)<br>80°C<br>2 h<br>pH 10       | Hexagonal<br>120 nm   | Diffusion<br>37°C<br>24 h<br>pH NM<br>Inoculum size NM<br>Ciprofloxacin 5 µg | <i>B. subtilis</i><br><i>E. coli</i><br><i>P. aeruginosa</i><br><i>S. aureus</i><br><i>S. pyogenes</i>                                 | 14<br>11<br>16<br>16<br>12 mm      | [752] |
| <i>Pithecellobium dulce</i>     |         |                                                                                 | Hexagonal<br>34.7 nm  |                                                                              | <i>B. subtilis</i><br><i>E. coli</i><br><i>P. aeruginosa</i><br><i>S. aureus</i><br><i>S. pyogenes</i>                                 | 15<br>17<br>19<br>19<br>15 mm      |       |
| <i>Artabotrys hexapetal</i>     | Leaves  | Zinc nitrate 500<br>mM/ plant extract<br>10 % (1:1 v/v)<br>80°C<br>2 h<br>pH NM | Spherical<br>15–20 nm | Diffusion<br>37°C<br>24 h<br>pH NM<br>Inoculum size NM<br>No control         | <i>Streptococcus pneumoniae</i><br><i>Serratia marcescens</i>                                                                          | 5<br>13 mm                         | [753] |
| <i>Bambusa vulgaris</i>         |         |                                                                                 | Hexagonal<br>20–50 nm |                                                                              | <i>Streptococcus pneumoniae</i><br><i>Serratia marcescens</i>                                                                          | 6<br>15 mm                         |       |
| <i>Nyctanthes arbor-tristis</i> | Flowers | Zinc acetate 10<br>mM/ plant extract<br>10 % (1:5 v/v)<br>60°C<br>2 h<br>pH 12  | Hexagonal<br>32 nm    | Dilution<br>28°C<br>72 h<br>pH NM<br>1×10 <sup>5</sup> CFU/ml<br>No control  | <i>Aspergillus alternata</i><br><i>A. niger</i><br><i>Botrytis cinerea</i><br><i>Fusarium oxysporum</i><br><i>Penicillium expansum</i> | 64<br>16<br>128<br>64<br>128 µg/ml | [754] |
| <i>Aegle marmelos</i>           | Fruit   | Zinc nitrate/ plant<br>extract 5 % (3:10<br>w/v)                                | Hexagonal<br>20 nm    | Diffusion<br>37°C<br>24 h                                                    | <i>S. aureus</i><br><i>E. coli</i><br><i>P. aeruginosa</i>                                                                             | 6<br>7.5<br>3                      | [755] |

|                            |         |                                                                                     |                                       |                                                                                                                                                   |                                                                                                                   |                       |       |
|----------------------------|---------|-------------------------------------------------------------------------------------|---------------------------------------|---------------------------------------------------------------------------------------------------------------------------------------------------|-------------------------------------------------------------------------------------------------------------------|-----------------------|-------|
|                            |         | 100°C<br>2h<br>pH NM                                                                |                                       | pH NM<br>1×10 <sup>5</sup> CFU/ml<br>No control                                                                                                   | MRSA<br><i>K. pneumoniae</i><br><i>B. subtilis</i><br><i>S. typhi</i>                                             | 3<br>2<br>12<br>7 mm  |       |
| <i>Ziziphus nummularia</i> | Leaves  | Zinc nitrate/ plant<br>extract 5 % (1:10<br>w/v)<br>80°C<br>2 h                     | Spherical and<br>irregular<br>17.3 nm | Diffusion<br>28°C<br>48 h<br>pH NM<br>6×10 <sup>5</sup> CFU/ml<br>Clotrimazol 10 µg<br>Fluconazol 10 µg<br>Itraconazol 30 µg<br>Ketoconazol 30 µg | <i>C. albicans</i> ATCC 2091<br><i>Candida glabrata</i> NCIM 3448<br><i>Cryptococcus neoformans</i> ATCC<br>34664 | 12.5<br>12<br>15.5 mm | [756] |
| <i>Lantana aculeata</i>    | Leaves  | Zinc nitrate/ plant<br>extract 10 % (1:2<br>w/v)<br>100°C<br>5 h<br>pH NM           | Spherical<br>12±3 nm                  | Diffusion<br>37°C<br>48 h<br>pH NM<br>Inoculum size NM<br>Amphotericin B 10 µg/ml                                                                 | <i>A. niger</i><br><i>Fusarium oxysporum</i>                                                                      | 21<br>19 mm           | [757] |
| <i>Syzygium aromaticum</i> | Flowers | Zinc acetate/ plant<br>extract 10 % (1:5<br>w/v)<br>80°C<br>5–10 min<br>pH NM       | Hexagonal<br>35nm                     | Dilution<br>28°C<br>14 days<br>pH NM<br>1×10 <sup>6</sup> CFU/ml<br>No control                                                                    | <i>Fusarium graminearum</i>                                                                                       | 140 µg/ml             | [758] |
| <i>Ricinus communis</i>    | Seed    | Zinc nitrate/ plant<br>extract 25 %<br>(1:35 w/v)<br>40±10 °C<br>10–15 min<br>pH NM | Hexagonal<br>12–14 nm                 | Diffusion<br>37°C<br>24 h<br>pH NM<br>Inoculum size NM<br>No control                                                                              | <i>Penicillium expansum</i><br><i>Aspergillus spp</i><br><i>Rhizopus spp</i>                                      | 3<br>4<br>0 mm        | [759] |
| <i>Azima tetracantha</i>   | Leaves  | Zinc sulfate 500<br>mM/ plant extract<br>10 % (1:1 v/v)<br>90°C                     | Spherical<br>18–25 nm                 | Diffusion<br>28°C<br>60 h<br>pH NM                                                                                                                | <i>A. niger</i><br><i>C. albicans</i>                                                                             | 16<br>48 mm           | [760] |

|                                  |        |                                                                                   |                                  |                                                                                       |                                                                                   |                        |       |
|----------------------------------|--------|-----------------------------------------------------------------------------------|----------------------------------|---------------------------------------------------------------------------------------|-----------------------------------------------------------------------------------|------------------------|-------|
|                                  |        | 4 h<br>pH NM                                                                      |                                  | 1×10 <sup>5</sup> CFU/ml<br>No control                                                |                                                                                   |                        |       |
| <i>Scadoxus multiflorus</i>      | Leaves | Zinc nitrate 1 mM/ plant extract<br>30 % (4:1 v/v)<br>60° C<br>3 h<br>pH NM       | Irregular and spherical<br>31 nm | Standard plate count<br>28° C<br>24 h<br>pH NM<br>Inoculum size NM<br>Carbendazim**   | <i>A. flavus</i> MTCC873<br><i>A.niger</i> MTCC282                                | 76<br>63 %             | [335] |
| <i>Trianthema portulacastrum</i> | Plant  | Zinc sulfate 30 mM/ plant extract<br>40% (5:2 v/v)<br>25° C<br>10 min<br>pH NM    | Spherical<br>25–90 nm            | Diffusion<br>37° C<br>24 h<br>pH NM<br>1×10 <sup>8</sup> CFU/ml<br>Chloramphenicol ** | <i>E. coli</i><br><i>S. aureus</i>                                                | 16<br>16 mm            | [19]  |
|                                  |        |                                                                                   |                                  | Diffusion<br>25° C<br>7 days<br>pH NM<br>Inoculum size NM<br>Nystatin**               | <i>A.niger</i><br><i>A. flavus</i><br><i>A. fumigatus</i>                         | 45<br>41<br>51 %       |       |
| <i>Pithecellobium dulce</i>      | Peel   | Zinc nitrate 5 mM/ plant extract<br>10 % (4: 1 v/v)<br>80° C<br>45 min<br>pH NM   | Spherical<br>50–70 nm            | Dilution<br>37° C<br>72 h<br>pH NM<br>Inoculum size NM<br>Fluconazol                  | <i>A. flavus</i><br><i>A.niger</i>                                                | 63.6<br>43 %           | [761] |
| <i>Costus igneus</i>             | Leaves | Zinc acetate 20 mM / plant extract 10 %<br>(10:1 w/v)<br>80° C<br>30 min<br>pH NM | Spherical<br>65–95 nm            | Diffusion<br>37° C<br>24 h<br>pH NM<br>Inoculum size NM<br>No control                 | <i>S. aureus</i><br><i>S. epidermis</i><br><i>E. coli</i><br><i>K. pneumoniae</i> | 60<br>70<br>48<br>52 % | [762] |

|                              |         |                                                                                     |                   |                                                                                             |                                                                    |            |       |
|------------------------------|---------|-------------------------------------------------------------------------------------|-------------------|---------------------------------------------------------------------------------------------|--------------------------------------------------------------------|------------|-------|
| <i>Jacaranda mimosifolia</i> | Flowers | Zinc gluconate<br>0.1 mM/ plant<br>extract 1 % (1:1<br>v/v)<br>60°C<br>3 h<br>pH 12 | Hexagonal<br>4 nm | Standard plate count<br>35±1 °C<br>24 h<br>pH NM<br>1×10 <sup>6</sup> CFU /ml<br>No control | <i>Entrococcus faecium</i> ATCC 35667<br><i>E. coli</i> ATCC 25922 | 98<br>92 % | [763] |
|------------------------------|---------|-------------------------------------------------------------------------------------|-------------------|---------------------------------------------------------------------------------------------|--------------------------------------------------------------------|------------|-------|

\*MIC=minimal inhibition concentration; ZOI=zone of inhibition; PI=percentage of inhibition

\*\*The quantity or concentration is not mentioned.

NM=not mentioned, MRSA=methicillin-resistant *S. aureus*

Table S4. Green platinum nanoparticles exhibiting antimicrobial activity

| Plant type | Part used | Operative conditions<br>for synthesis | NP<br>characteristics | Microbiological analyses (operative conditions) |                          |                    | Refs. |
|------------|-----------|---------------------------------------|-----------------------|-------------------------------------------------|--------------------------|--------------------|-------|
|            |           |                                       |                       | Methods,                                        | Tested bacteria or fungi | MIC, DOI<br>or PI* |       |

|                            |        |                                                                              | (shape and size)            | incubation temperature, incubation time, pH, inoculum density, positive control |                                                                                                                                                             |                               |       |
|----------------------------|--------|------------------------------------------------------------------------------|-----------------------------|---------------------------------------------------------------------------------|-------------------------------------------------------------------------------------------------------------------------------------------------------------|-------------------------------|-------|
| <i>Spinacia oleracea</i>   | Leaves | Hexachloroplatinic acid 20 mM/ plant extract 75 % (2:1 v/v) 100°C 24 h pH NM | Rod 154 nm                  | Diffusion 37°C 24 h pH NM 1×10 <sup>5</sup> CFU/ml No control                   | <i>S. typhi</i> MTCC 098                                                                                                                                    | 13 mm                         | [227] |
| <i>Prunus yedoensis</i>    | Gum    | Hexachloroplatinic acid 100 mM/ plant extract 25 % (5:1 v/v) 80°C 5 h pH NM  | Spherical and oval 10–50 nm | Diffusion 37°C 48 h pH NM Inoculum size NM Nystatin                             | <i>Phytophthora capsici</i><br><i>Phytophthora drechsleri</i><br><i>Didymella bryoniae</i><br><i>Colletotrichum acutatum</i><br><i>Cladosporium fulvum</i>  | 0<br>0<br>0<br>15<br>18 mm    | [764] |
| <i>Xanthium strumarium</i> | Leaves | Hexachloroplatinic acid 1 mM/ plant extract 1 % (19:1 v/v) 100°C 1 h pH NM   | Cubic 20 nm                 | Diffusion 37°C 24 h pH NM Inoculum size NM Azithromycin 30 µg                   | <i>E. coli</i> ATCC 25922<br><i>K. pneumoniae</i> MTCC 930<br><i>P. aeruginosa</i> ATCC 27853<br><i>S. aureus</i> ATCC 25923<br><i>B. subtilis</i> MTCC 441 | 20<br>19<br>18<br>22<br>19    | [765] |
|                            |        |                                                                              |                             | Diffusion 37°C 72 h pH NM Inoculum size NM Clotrimazol 30 µg                    | <i>C. albicans</i> MTCC 227<br><i>Candida tropicalis</i><br><i>Candida parapsilosis</i><br><i>A. flavus</i> MTCC 277<br><i>A. niger</i> MTCC 281            | 16<br>17<br>15<br>16<br>15 mm |       |

|                                 |        |                                                                               |                        |                                                               |                                                                                                                                              |                                |       |
|---------------------------------|--------|-------------------------------------------------------------------------------|------------------------|---------------------------------------------------------------|----------------------------------------------------------------------------------------------------------------------------------------------|--------------------------------|-------|
| <i>Jatropha gossypifolia</i>    | Leaves | Hexachloroplatinic acid 1 mM/ plant extract 30 % (9:1 v/v) 30°C 1 h pH NM     | Spherical 20 nm        | Diffusion 37°C 24 h pH NM Inoculum size NM Tetracyclin 10 µg  | <i>Bacillus licheniformis</i><br><i>S. epidermidis</i><br><i>S. aureus</i><br><i>E. coli</i><br><i>K. pneumoniae</i><br><i>P. aeruginosa</i> | 0<br>0<br>10<br>0<br>8<br>7 mm | [766] |
| <i>Jatropha glandulifera</i>    |        |                                                                               | Spherical 100 nm       |                                                               | <i>Bacillus licheniformis</i><br><i>S. epidermidis</i><br><i>S. aureus</i><br><i>E. coli</i><br><i>K. pneumoniae</i><br><i>P. aeruginosa</i> | 0<br>0<br>10<br>0<br>9<br>9 mm |       |
| <i>Phoenix dactylifera</i>      | date   | Hexachloroplatinic acid 1 mM/ date extract 20 % (5:6 v/v) 90 °C 20 min pH 8.5 | Spherical 45 nm        | Diffusion 37°C 24 h pH NM NM No control                       | <i>P. aeruginosa</i><br><i>S. pyogenes</i>                                                                                                   | 32.5<br>35.5 mm                | [767] |
| <i>Combretum erythrophyllum</i> | Leaves | Hexachloroplatinic acid 1 mM/ plant extract 5 % (5:1 v/v) 90 °C 1 h pH NM     | Spherical 1.04±0.26 nm | Dilution 37°C 24 h pH NM Inoculum size NM Streptomycin**      | <i>S. epidermidis</i> ATCC 14990<br><i>Klebsiella oxytoca</i> ATCC 8724<br><i>Klebsiella aerogenes</i> ATCC 27853                            | 3.1<br>1.6<br>1.6 µg/ml        | [768] |
| <i>Tragia involucrata</i>       | Leaves | Hexachloroplatinic acid 1 mM/ plant extract 30 % (9:1v/v) 50°C 1 h            | Spherical 10 nm        | Diffusion 37°C 24 h pH NM 10 <sup>5</sup> CFU/ml Gentamicin** | <i>E. coli</i><br><i>S. aureus</i>                                                                                                           | 23<br>19 mm                    | [769] |
| <i>Atriplex halimus</i>         | Leaves | Hexachloroplatinic acid 1.9 mM/ plant extract 5 % (1:10 v/v)                  | Spherical 3 nm         | Diffusion 37°C 24 h                                           | <i>E. coli</i><br><i>K. pneumoniae</i><br><i>B. subtilis</i>                                                                                 | 0<br>17<br>0                   | [770] |



|  |  |                       |  |                                                 |                  |      |  |
|--|--|-----------------------|--|-------------------------------------------------|------------------|------|--|
|  |  | 95°C<br>1 h<br>pH 9.6 |  | pH NM<br>2×10 <sup>8</sup> CFU/ml<br>No control | <i>S. aureus</i> | 0 mm |  |
|--|--|-----------------------|--|-------------------------------------------------|------------------|------|--|

\*MIC=minimal inhibition concentration; ZOI=zone of inhibition; PI=percentage of inhibition

\*\*The quantity or concentration is not mentioned.

NM=not mentioned, MRSA=methicillin-resistant *S. aureus*

Table S5. Green palladium nanoparticles with antimicrobial activity

| Plant type              | Part used | Operative conditions for synthesis                                                      | NP characteristics (shape and size) | Microbiological analyses (operative conditions)                                          |                                    |                 | Refs. |
|-------------------------|-----------|-----------------------------------------------------------------------------------------|-------------------------------------|------------------------------------------------------------------------------------------|------------------------------------|-----------------|-------|
|                         |           |                                                                                         |                                     | Methods, incubation temperature, incubation time, pH, inoculum density, positive control | Tested bacteria or fungi           | MIC, DOI or PI* |       |
| <i>Salvia hispanica</i> | Leaves    | Palladium chloride<br>100 mM/ plant extract<br>5 % (4:1 v/v)<br>80°C<br>10 min<br>pH NM | Spherical<br>25 nm                  | Diffusion<br>37°C<br>24 h<br>pH NM<br>Inoculum size NM<br>Gentamycin**<br>Penicillin**   | <i>S. aureus</i><br><i>E. coli</i> | 25.5<br>21.2 mm | [771] |

|                              |        |                                                                                     |                       |                                                                               |                                                                                  |                         |       |
|------------------------------|--------|-------------------------------------------------------------------------------------|-----------------------|-------------------------------------------------------------------------------|----------------------------------------------------------------------------------|-------------------------|-------|
| <i>Diospyros kaki</i>        | Leaves | Palladium chloride 1 mM/ plant extract 20 % (1:1 v/v)<br>60-70°C<br>25 min<br>pH NM | Spherical<br>98 nm    | Diffusion<br>37°C<br>24 h<br>pH NM<br>10 <sup>8</sup> CFU/ml<br>No control    | <i>E. coli</i> ATCC 25922<br><i>S. aureus</i> ATCC 25923                         | 18<br>10.5 mm           | [772] |
| <i>Santalum album</i>        | Leaves | Palladium chloride 1 mM/ plant extract 10 % (9:1 v/v)<br>60°C<br>10 min<br>pH NM    | Spherical<br>19 nm    | Diffusion<br>37°C<br>24 h<br>pH NM<br>Inoculum size NM<br>Levofloxacin**      | <i>E. coli</i><br><i>P. aeruginosa</i><br><i>S. aureus</i><br><i>B. subtilis</i> | 31<br>30<br>12<br>18 mm | [773] |
| <i>Solanum nigurum</i>       | Leaves | Palladium chloride 0.3 mM/ plant extract 10 % (1:8 v/v)<br>100°C<br>10 min<br>pH NM | Spherical<br>21.55 nm | Diffusion<br>37°C<br>24 h<br>pH NM<br>Inoculum size NM<br>No control          | <i>E. coli</i>                                                                   | 18 mm                   | [774] |
| <i>Sapium sebiferum</i>      | Leaves | Palladium chloride 0.003 mM/ plant extract 5 % (5:1 v/v)<br>70°C<br>2 h<br>pH NM    | Spherical<br>5 nm     | Diffusion<br>37°C<br>24 h<br>pH NM<br>Inoculum size NM<br>Streptomycin**      | <i>S. aureus</i><br><i>B. subtilis</i><br><i>P. aeruginosa</i>                   | 29<br>19<br>11 mm       | [775] |
| <i>Orthosiphon stamineus</i> | Gum    | Palladium chloride 1 mM/ plant extract 1 % (1:5 v/v)<br>85°C<br>2 h<br>pH NM        | Spherical<br>20 nm    | Well diffusion<br>37°C<br>24 h<br>pH NM<br>Inoculum size NM<br>Erythromycin** | <i>E. coli</i><br><i>S. aureus</i>                                               | 18<br>19 nm             | [776] |
| <i>Anogeissus latifolia</i>  | Gum    | Palladium chloride 1 mM/ plant extract 10 % (1:1 v/v)<br>121°C                      | Spherical<br>5 nm     | Diffusion<br>37°C<br>24 h<br>pH NM                                            | <i>P. aeruginosa</i> ATCC 27853<br><i>S. aureus</i> ATCC 25923                   | 14.3<br>12 mm           | [777] |

|                              |        |                                                                                    |                       |                                                                                                 |                                                                                                                                                                                                                                                                                                                                              |                                                            |       |
|------------------------------|--------|------------------------------------------------------------------------------------|-----------------------|-------------------------------------------------------------------------------------------------|----------------------------------------------------------------------------------------------------------------------------------------------------------------------------------------------------------------------------------------------------------------------------------------------------------------------------------------------|------------------------------------------------------------|-------|
|                              |        | 30 min<br>pH NM                                                                    |                       | 1×10 <sup>8</sup> CFU/ml<br>Streptomycin 10 µg                                                  |                                                                                                                                                                                                                                                                                                                                              |                                                            |       |
| <i>Couroupita guianensis</i> | Fruit  | Palladium chloride 1 mM/ plant extract 5 % (19:1 v/v)<br>30°C<br>9 h<br>pH NM      | Spherical<br>5–15 nm  | Diffusion<br>37°C<br>24 h<br>pH NM<br>Inoculum size NM<br>Streptomycin 1mg/ml                   | <i>S. aureus</i> MTCC96<br><i>E. coli</i> MTCC1687<br><i>Proteus mirabilis</i> MTCC 425<br><i>P. aeruginosa</i> MTCC 1688<br><i>Vibrio cholerae</i> MTCC 3906<br><i>B. cereus</i> MTCC 1272<br><i>S. typhi</i> MTCC 3917<br><i>Micrococcus luteus</i> MTCC 1809<br><i>K. pneumoniae</i> MTCC 530<br><i>Rhodococcus rhodochorous</i> MTCC 265 | 12<br>17<br>13<br>12<br>14<br>13<br>15<br>9<br>20<br>13 mm | [778] |
| <i>Melia azedarach</i>       | Leaves | Palladium chloride 1 mM/ plant extract 10 % (10:1 v/v)<br>100°C<br>20 min<br>pH NM | Spherical<br>10–20 nm | Diffusion<br>37°C<br>24 h<br>pH NM<br>1.5×10 <sup>8</sup> CFU/ml<br>Ofloxacin**<br>Gentamicin** | <i>B. subtilis</i> ATCC 6633<br><i>S. aureus</i> MTCC 96<br><i>S. pneumoniae</i> MTCC 1936<br><i>E. coli</i> MTCC 40<br><i>Proteus vulgaris</i> MTCC 7299<br><i>P. aeruginosa</i> MTCC 2642                                                                                                                                                  | 8.3<br>7.3<br>5.3<br>7.3<br>5.3<br>7.3 mm                  | [779] |
|                              |        |                                                                                    |                       | Diffusion<br>37°C<br>48 h<br>pH NM<br>1.5×10 <sup>8</sup> CFU/ml<br>Ofloxacin**<br>Gentamicin** | <i>A. niger</i><br><i>Fusarium solani</i><br><i>Nigrospora oryzae</i><br><i>Trichoderma viride</i>                                                                                                                                                                                                                                           | 0<br>0<br>0<br>0 mm                                        |       |
| <i>Padina boryana</i>        | Powder | Tetrachloropalladate 10 mM/ plant extract 5 % (20:1 v/v)<br>60°C<br>2 h<br>pH NM   | Spherical<br>8.7 nm   | Diffusion<br>37°C<br>24 h<br>pH NM<br>1×10 <sup>8</sup> CFU/ml<br>Gentamicin**                  | <i>S. aureus</i><br><i>Escherichia fergusonii</i><br><i>Acinetobacter pittii</i><br><i>P. aeruginosa</i><br><i>Aeromonas enteropelogenes</i><br><i>Proteus mirabilis</i>                                                                                                                                                                     | 18<br>20<br>23<br>21<br>19<br>23 mm                        | [780] |

|                               |        |                                                                                  |                      |                                                                                     |                                                              |                   |       |
|-------------------------------|--------|----------------------------------------------------------------------------------|----------------------|-------------------------------------------------------------------------------------|--------------------------------------------------------------|-------------------|-------|
| <i>Catharanthus roseus</i>    | Leaves | Palladium chloride 1 mM/ plant extract 5 % (5:1 v/v)<br>60°C<br>1 h<br>pH NM     | Spherical<br>38 nm   | Diffusion<br>37°C<br>24 h<br>pH NM<br>Inoculum size NM<br>Streptomycin**            | <i>Proteus mirabilis</i><br><i>S. aureus</i>                 | 12<br>11 mm       | [781] |
| <i>Citrullus lanatus</i>      | Rind   | Palladium chloride 1 mM/ plant extract 2 % (2:1 v/v)<br>30°C<br>24 h<br>pH NM    | Spherical<br>96 nm   | Diffusion<br>37°C<br>24 h<br>pH NM<br>Inoculum size NM<br>No control                | <i>E. coli</i><br><i>S. typhi</i>                            | 29<br>23 mm       | [782] |
| <i>Stachys lavandulifolia</i> | Herbal | Palladium chloride 1 mM/ plant extract 10 % (1:1 v/v)<br>100°C<br>2 h<br>pH NM   | Spherical<br>5-7 nm  | Diffusion<br>37°C<br>24 h<br>pH NM<br>1×10 <sup>6</sup> CFU/ml<br>Chloramphenicol** | <i>S. aureus</i><br><i>P. aeruginosa</i><br><i>B. cereus</i> | 15<br>17<br>19 mm | [783] |
| <i>Hypericum hookerianum</i>  | Leaves | Palladium chloride 1 mM/ plant extract 10 % (1:1 v/v)<br>70°C<br>15 min<br>pH NM | Spherical<br>2-10 nm | Diffusion<br>37°C<br>24 h<br>pH NM<br>Inoculum size NM<br>No control                | <i>B. subtilis</i><br><i>P. aeruginosa</i>                   | 17 mm             | [784] |

\*MIC=minimal inhibition concentration; ZOI=zone of inhibition; PI=percentage of inhibition

\*\*The quantity or concentration is not mentioned.

NM=not mentioned, MRSA=methicillin-resistant *S. aureus*

Table S6. Green copper nanoparticles exhibiting antimicrobial activity

| Plant type                | Part used | Operative conditions for synthesis                                                | NP Characteristics (shape and size)       | Microbiological analyses (operative conditions)                                          |                                                                                              |                         | Refs. |
|---------------------------|-----------|-----------------------------------------------------------------------------------|-------------------------------------------|------------------------------------------------------------------------------------------|----------------------------------------------------------------------------------------------|-------------------------|-------|
|                           |           |                                                                                   |                                           | Methods, incubation temperature, incubation time, pH, inoculum density, positive control | Tested bacteria or fungi                                                                     | MIC, DOI or PI*         |       |
| <i>Echinops sp.</i>       | Roots     | Copper (II) nitrate 500 mM/ plant extract 10 % (4:1 v/v)<br>Room<br>24 h<br>pH NM | Spherical<br>20 nm                        | Diffusion<br>35±2°C<br>18–24 h<br>pH NM<br>Inoculum size NM<br>Chloramphenicol**         | <i>S. aureus</i><br><i>E. coli</i><br><i>P. aeruginosa</i><br><i>E. aerogenes</i>            | 13<br>12<br>10<br>12 mm | [785] |
| <i>Aerva javanica</i>     | Leaves    | Copper (II) chloride 4 mM/ plant extract 10 % (25:1 v/v)<br>80°C<br>2 h<br>pH NM  | Spherical, hexagonal and oval<br>12–14 nm | Diffusion<br>37°C<br>24 h<br>pH NM<br>1×10 <sup>8</sup> CFU/ml<br>Norfloxacin**          | <i>E. coli</i><br><i>P. aeruginosa</i><br><i>S. aureus</i><br><i>Acinetobacter baumannii</i> | 5<br>5<br>9<br>5 mm     | [786] |
| <i>Hagenia abyssinica</i> | Leaves    | Copper (II) sulfate 5 mM/ plant extract 10 % (10:1 v/v)<br>50°C                   | Spherical<br>34.8 nm                      | Diffusion<br>37°C<br>24 h<br>pH NM                                                       | <i>E. coli</i><br><i>S. aureus</i><br><i>B. subtilis</i><br><i>P. aeruginosa</i>             | 12<br>14<br>14<br>12 mm | [787] |

|                                 |        |                                                                                       |                      |                                                                           |                                                                                                 |                     |       |
|---------------------------------|--------|---------------------------------------------------------------------------------------|----------------------|---------------------------------------------------------------------------|-------------------------------------------------------------------------------------------------|---------------------|-------|
|                                 |        | 24 h<br>pH 7                                                                          |                      | 1.3×10 <sup>8</sup> CFU/ml<br>Ampicillin**                                |                                                                                                 |                     |       |
| <i>Syzygium aromaticum</i>      | Bud    | Copper (II) acetate 1 mM/ plant extract 10 % (5:1 v/v)<br>30°C<br>15 min<br>pH NM     | Spherical<br>20 nm   | Diffusion<br>37°C<br>24 h<br>pH NM<br>Inoculum size NM<br>No control      | <i>Staphylococcus spp</i><br><i>E. coli</i><br><i>Pseudomonas spp</i><br><i>Bacillus spp</i>    | 5<br>6<br>7<br>8 mm | [788] |
|                                 |        |                                                                                       |                      | Diffusion<br>37°C<br>72 h<br>pH NM<br>Inoculum size NM<br>No control      | <i>A. niger</i><br><i>A. flavus</i><br><i>Penicillium spp</i>                                   | 5<br>5<br>6 mm      |       |
| <i>Ocimum sanctum</i>           | Leaves | Copper (II) sulfate 50 mM/ plant extract 10 % (1:1 v/v)<br>60°C<br>10-15 min<br>pH NM | Spherical<br>29 nm   | Dilution<br>37°C<br>18–24 h<br>pH NM<br>Inoculum size NM<br>Doxycycline** | <i>E. coli</i><br><i>B. subtilis</i><br><i>C. albicans</i>                                      | 31.2<br>-<br>125 ug | [789] |
| <i>Parthenium hysterophorus</i> | Leaves | Copper (II) sulfate 1 mM/ plant extract 10 % (5:2 v/v)<br>Room<br>24 h<br>pH NM       | Spherical<br>20 nm   | Diffusion<br>37°C<br>24h<br>pH NM<br>Inoculum size NM<br>Streptomycin**   | <i>B. subtilis</i><br><i>S. aureus</i>                                                          | 46<br>35            | [790] |
|                                 |        |                                                                                       |                      | Diffusion<br>28°C<br>48–72 h<br>pH NM<br>Inoculum size NM<br>No control   | <i>C. albicans</i><br><i>A. flavus</i>                                                          | 35<br>42 mm         |       |
| <i>Gloriosa superba</i>         | Leaves | Copper (II) sulfate 1 mM/ plant extract 5 % (4:1 v/v)                                 | Spherical<br>5–10 nm | Diffusion<br>37°C<br>24–36 h                                              | <i>Klebsiella aerogenes</i> NCIM 2098<br><i>E. coli</i> NCIM 5051<br><i>S. aureus</i> NCIM 5022 | 15<br>13<br>6       | [262] |

|                             |         |                                                                                           |                      |                                                                                 |                                                                                                                                    |                                     |       |
|-----------------------------|---------|-------------------------------------------------------------------------------------------|----------------------|---------------------------------------------------------------------------------|------------------------------------------------------------------------------------------------------------------------------------|-------------------------------------|-------|
|                             |         | 60°C<br>3–4 min<br>pH NM                                                                  |                      | pH NM<br>Inoculum size NM<br>Ciprofloxacin 0.5 µg/µl                            | <i>Pseudomonas desmolyticum</i><br>NCIM 2028                                                                                       | 5 mm                                |       |
| <i>Cassia auriculata</i>    | Leaves  | Copper (II) sulfate 1 mM/ plant extract 5 % (4:1 v/v)<br>Room temperature<br>5 h<br>pH NM | Clusters<br>38 nm    | Diffusion<br>37°C<br>24 h<br>pH NM<br>1×10 <sup>8</sup> CFU/ml<br>Amoxicillin** | <i>E. coli</i><br><i>P. aeruginosa</i><br><i>S. aureus</i><br><i>Proteus mirabilis</i><br><i>B. cereus</i><br><i>K. pneumoniae</i> | 16<br>10<br>14<br>16<br>18<br>14 mm | [263] |
| <i>Bifurcaria bifurcate</i> | Alga    | Copper (II) sulfate 1 mM / plant extract 20 % (10:1 v/v)<br>100–120°C<br>24 h<br>pH NM    | Spherical<br>5-45 nm | Diffusion<br>37°C<br>24 h<br>pH NM<br>Inoculum size NM<br>Gentamicin**          | <i>Enterobacter aerogenes</i><br><i>S. aureus</i>                                                                                  | 14<br>16 mm                         | [791] |
| <i>Zingiber officinale</i>  | Rhizome | Copper (II) sulfate 5 mM/ plant extract 30 % (5:3 v/v)<br>60°C<br>4 h<br>pH NM            | Spherical<br>31 nm   | Diffusion<br>37°C<br>24 h<br>pH NM<br>Inoculum size NM<br>Ciprofloxacin**       | <i>E. coli</i>                                                                                                                     | 22 mm                               | [792] |
| <i>Nerium oleander</i>      | Leaves  | Copper (II) sulfate 1 mM/ plant extract 5 % (4:1 v/v)<br>50°C<br>20 min<br>pH NM          | Spherical<br>20 nm   | Diffusion<br>37°C<br>24 h<br>pH NM<br>Inoculum size NM<br>Gentamicin**          | <i>E. coli</i><br><i>S. aureus</i><br><i>K. pneumoniae</i><br><i>S. typhi</i><br><i>B. subtilis</i>                                | 10<br>13<br>10<br>18<br>14 mm       | [793] |
| <i>Tilia europaea</i>       | Leaves  | Copper (II) sulfate 1 mM/ plant extract 20 % (1:4 v/v)<br>80°C<br>25 min<br>pH NM         | Spherical<br>4-18 nm | Diffusion<br>37°C<br>24 h<br>pH 7.3<br>Inoculum size NM<br>Cefipime 150 µg/ml   | <i>P. aeruginosa</i> ATCC 9027<br><i>E. coli</i> ATCC 8739<br><i>B. subtilis</i> ATCC 6633<br><i>S. aureus</i> ATCC 6538P          | 16<br>13<br>15<br>13 mm             | [794] |

|                            |        |                                                                                              |                      |                                                                                                      |                                                                                                                                                                      |                                    |       |
|----------------------------|--------|----------------------------------------------------------------------------------------------|----------------------|------------------------------------------------------------------------------------------------------|----------------------------------------------------------------------------------------------------------------------------------------------------------------------|------------------------------------|-------|
|                            |        |                                                                                              |                      | Diffusion<br>37°C<br>24 h<br>pH 5.6<br>Inoculum size NM<br>Fluconazole 150 µg/ml                     | <i>C. albicans</i> ATCC 10231                                                                                                                                        | 11 mm                              |       |
| <i>Allium sativum</i>      | Leaves | Copper (II) sulfate 10 mM/ plant extract 10 % (5:1 v/v)<br>Room temperature<br>48 h<br>pH NM | Spherical<br>100 nm  | Diffusion<br>37°C<br>24 h<br>pH NM<br>Inoculum size NM<br>Ampicillin**                               | <i>E. coli</i><br><i>B. subtilis</i>                                                                                                                                 | 13<br>18 mm                        | [795] |
| <i>Gum karaya</i>          | Powder | Copper (II) chloride 10 mM/ plant extract 10 % (1:100 v/v)<br>75°C<br>1 h<br>pH NM           | Spherical<br>2–10 nm | Diffusion<br>37°C<br>24 h<br>pH NM<br>Inoculum size NM<br>5×10 <sup>6</sup> CFU/ml<br>Tetracycline** | <i>E. coli</i> MTCC 443<br><i>S. aureus</i> MTCC 737                                                                                                                 | 16<br>14 mm                        | [796] |
| <i>Eucalyptus globules</i> | Leaves | Copper (II) sulfate 30 mM/ plant extract 20 % (4:1 v/v)<br>60°C<br>3 h<br>pH 12              | Rod<br>17 nm         | Diffusion<br>37°C<br>24 h<br>pH NM<br>1×10 <sup>7</sup> CFU/ml<br>Amoxicillin**                      | <i>E. coli</i> -336<br><i>P. aeruginos</i> - 621<br>MRSA                                                                                                             | 25<br>13<br>7 mm                   | [797] |
| <i>Tea/ Coffee</i>         | Powder | Copper (I) nitrate 1 mM/ plant extract 10 % (1:3 v/v)<br>100°C<br>7–8 min<br>pH NM           | Spherical<br>5–16 nm | Diffusion<br>37°C<br>24 h<br>pH NM<br>1×10 <sup>4</sup> CFU/ml<br>No control                         | <i>Shigella dysenteriae</i><br><i>Vibrio cholera</i> L 4<br><i>Vibrio cholerae</i> CSK 6669<br><i>Streptococcus pneumoniae</i><br><i>S. aureus</i><br><i>E. coli</i> | 12<br>12<br>11<br>9<br>12<br>11 mm | [798] |



|                         |        |                                                                                            |                       |                                                                                   |                                                                                                     |                                       |       |
|-------------------------|--------|--------------------------------------------------------------------------------------------|-----------------------|-----------------------------------------------------------------------------------|-----------------------------------------------------------------------------------------------------|---------------------------------------|-------|
| <i>Acalypha indica</i>  | Leaves | Copper (II) sulfate 10 mM/ plant extract 20 % (1:1 v/v)<br>100°C<br>7–8 h<br>pH NM         | Spherical<br>26–30 nm | Diffusion<br>37°C<br>24 h<br>pH NM<br>Inoculum size NM<br>Tetracycline 10 µg/ml   | <i>E. coli</i><br><i>Proteus vulgaris</i>                                                           | 15<br>9 mm                            | [799] |
|                         |        |                                                                                            |                       | Diffusion<br>37°C<br>48 h<br>pH NM<br>Inoculum size NM<br>No control              | <i>C. albicans</i>                                                                                  | 0 mm                                  |       |
| <i>Moringa oleifera</i> | Leaves | Copper (II) sulfate 3 mM/ plant extract 10 % (1:4 v/v)<br>60°C<br>3 h<br>pH NM             | Spherical<br>36–49 nm | Dilution<br>37°C<br>24 h<br>pH NM<br>Inoculum size NM<br>Streptomycin 20 µg/ml    | <i>E. coli</i><br><i>K. pneumoniae</i><br><i>S. aureus</i><br><i>Enterococcus faecalis</i>          | 500<br>500<br>500<br>250<br>125 µg/ml | [800] |
|                         |        |                                                                                            |                       | Dilution<br>37°C<br>18–24 h<br>pH NM<br>Inoculum size NM<br>Ketoconazole 20 µg/ml | <i>A.niger</i><br><i>A. flavus</i><br><i>C. albicans</i><br><i>Candida glabrata</i>                 | 125<br>62.5<br>31.25<br>µg/ml         |       |
| <i>Vitis vinifera</i>   | Leaves | Copper (II) sulfate 1 mM/ plant extract 10 % (4:1 v/v)<br>Room temperature<br>1 h<br>pH NM | Spherical<br>6 nm     | Diffusion<br>37°C<br>24 h<br>pH 7<br>Inoculum size NM<br>Chloramphenicol**        | <i>E. coli</i><br><i>S. aureus</i><br><i>B. subtilis</i><br><i>S. typhi</i><br><i>K. pneumoniae</i> | 14<br>18<br>12<br>9<br>8 mm           | [801] |

|                              |        |                                                                                         |                                |                                                                                                               |                                                                                                                                                                                         |                                     |       |
|------------------------------|--------|-----------------------------------------------------------------------------------------|--------------------------------|---------------------------------------------------------------------------------------------------------------|-----------------------------------------------------------------------------------------------------------------------------------------------------------------------------------------|-------------------------------------|-------|
| <i>Botryococcus braunii</i>  | Alga   | Copper (I) acetate 1 mM/ plant extract 2 % (10:1 v/v)<br>100°C<br>24 h<br>pH NM         | Cubical, spherical<br>10-70 nm | Diffusion<br>37°C<br>24 h<br>pH NM<br>Inoculum size NM<br>Chloramphenicol**                                   | <i>P. aeruginosa</i> MTCC 441<br><i>E. coli</i> MTCC 442<br><i>K. pneumoniae</i> MTCC 109<br><i>S. aureus</i> MTCC 96                                                                   | 17<br>18<br>19<br>22 mm             | [802] |
|                              |        |                                                                                         |                                | Diffusion<br>25°C<br>24 h<br>pH NM<br>Inoculum size NM<br>Nystatin**                                          | <i>Fusarium oxysporum</i> MTCC 2087                                                                                                                                                     | 12 mm                               |       |
| <i>Aloe vera</i>             | Leaves | Copper (I) nitrate 10 mM / plant extract 25 % (10 :1 v/v)<br>100–120°C<br>24 h<br>pH NM | Spherical<br>20-30 nm          | Diffusion<br>37°C<br>24 h<br>pH NM<br>1.5×10 <sup>8</sup> CFU/ml<br>Sulphafurazole 100 µg/ml                  | <i>Aeromonas hydrophila</i> MTCC 646<br><i>Pseudomonas fluorescens</i> MTCC 671<br><i>Flavobacterium branchiophilum</i> ATCC 35036                                                      | 13<br>15<br>11 mm                   | [803] |
| <i>Pterocarpus marsupium</i> | Broth  | Copper (II) sulfate 1 mM/ plant extract 5 % (1:1 v/v)<br>50°C<br>15 min<br>pH NM        | Spherical<br>40 nm             | Diffusion<br>37°C<br>24 h<br>pH NM<br>1×10 <sup>8</sup> CFU/ml<br>Gentamicin**                                | <i>K. pneumoniae</i> MTCC 9751<br><i>S. epidermidis</i> MTCC 2639<br><i>B. cereus</i> MTCC 90<br><i>S. aureus</i> MTCC 9442<br><i>P. vulgaris</i> MTCC 7299<br><i>E. coli</i> MTCC 9721 | 25<br>20<br>23<br>20<br>22<br>24 mm | [804] |
| <i>Madhuca longifolia</i>    | Seed   | Copper (I) nitrate 5 mM/ plant extract 10 % (10:1 v/v)<br>55 °C<br>4 h<br>pH 10         | Spherical<br>30 nm             | Diffusion<br>37°C<br>24 h<br>pH NM<br>Inoculum size NM<br>Ampicillin 10,000 µg/ml<br>Tetracyclin 10,000 µg/ml | <i>E. coli</i> BL21(DE3)<br><i>S. aureus</i><br><i>B. subtilis</i>                                                                                                                      | 16<br>0<br>15 mm                    | [805] |

|                                        |        |                                                                                             |                        |                                                                                          |                                                                                                |                         |       |
|----------------------------------------|--------|---------------------------------------------------------------------------------------------|------------------------|------------------------------------------------------------------------------------------|------------------------------------------------------------------------------------------------|-------------------------|-------|
| <i>Citrus limon/ Turmeric curcumin</i> | Fruit  | Copper (II) chloride 1 mM/ plant extract 5 % (1:1 v/v)<br>50-60°C<br>1 h<br>pH NM           | Shape NM<br>Size NM    | Diffusion<br>37°C<br>24h<br>pH NM<br>2×10 <sup>6</sup> CFU/ml<br>Chloramphenicol**       | <i>S. aureus</i><br><i>B. subtilis</i><br><i>E. coli</i>                                       | 17<br>21<br>19 mm       | [806] |
|                                        |        |                                                                                             |                        | Diffusion<br>25°C<br>72 h<br>pH NM<br>1×10 <sup>5</sup> CFU/ml<br>Fluconazole 1000 µg/ml | <i>C. albicans</i><br><i>Curvularia lunata</i><br><i>A. niger</i><br><i>Trichophyton simii</i> | 21<br>16<br>19<br>15 mm |       |
| <i>Ficus carica</i>                    | Leaves | Copper (II) chloride 10 mM/ plant extract 20 % (1:50 v/v)<br>70°C<br>24 h<br>pH NM          | Spherical<br>50-120 nm | Diffusion<br>37°C<br>24 h<br>pH NM<br>Inoculum size NM<br>Amoxicillin**                  | <i>Pediococcus acidilactici</i>                                                                | 17 mm                   | [807] |
| <i>Capparis zeylanica</i>              | Leaves | Copper (II) sulfate 1 mM / plant extract 5 % (4:1 v/v)<br>60°C<br>24 h<br>pH NM             | Spherical<br>60-100 nm | Diffusion<br>37°C<br>24 h<br>pH NM<br>Inoculum size NM<br>No control                     | <i>E. coli</i><br><i>S. aureus</i><br><i>P. aeruginosa</i>                                     | 11<br>10<br>10 mm       | [808] |
| <i>Hibiscus rosasinensis</i>           | Leaves | Copper (I) nitrate 50 mM/ plant extract 10 % (1:1 v/v)<br>Room temperature<br>48 h<br>pH NM | Spherical<br>500 nm    | Diffusion<br>37°C<br>16–18 h<br>pH NM<br>Inoculum size NM<br>Ampicillin**                | <i>E. coli</i><br><i>B. subtilis</i>                                                           | 0<br>10 mm              | [809] |
| <i>Dodonaea viscosa</i>                | Leaves | Copper (II) chloride 1 mM/ plant extract 20 % (2:1 v/v)                                     | Spherical<br>30-40 nm  | Diffusion<br>37°C<br>24 h                                                                | <i>E. coli</i> MTCC 443<br><i>K. pneumonia</i> NCIM 2079                                       | 9<br>14<br>8            | [274] |

|                            |        |                                                                                               |                       |                                                                                           |                                                                                                                    |                                    |       |
|----------------------------|--------|-----------------------------------------------------------------------------------------------|-----------------------|-------------------------------------------------------------------------------------------|--------------------------------------------------------------------------------------------------------------------|------------------------------------|-------|
|                            |        | 50°C<br>1 h<br>pH 10                                                                          |                       | pH NM<br>Inoculum size NM<br>No control                                                   | <i>Pseudomonas fluorescens</i> MTCC 121<br><i>S. aureus</i> MTCC 4032<br><i>B. subtilis</i> MTCC 441               | 10<br>9 mm                         |       |
| <i>Azadirachta indica</i>  | Leaves | Copper (II) sulfate 1 mM/ plant extract 10 % (1:1 v/v)<br>Room temperature<br>10 min<br>pH NM | Shape NM<br>Size NM   | Diffusion<br>37°C<br>24-48 h<br>pH NM<br>Inoculum size NM<br>No control                   | <i>E. coli</i><br><i>A. niger</i>                                                                                  | 5<br>0 mm                          | [810] |
| <i>Lantana camera</i>      |        |                                                                                               |                       |                                                                                           | <i>E. coli</i><br><i>A. niger</i>                                                                                  | 10<br>12 mm                        |       |
| <i>Tridax procumbens</i>   |        |                                                                                               |                       |                                                                                           | <i>E. coli</i><br><i>A. niger</i>                                                                                  | 10<br>0 mm                         |       |
| <i>Calotropis procera</i>  |        |                                                                                               |                       |                                                                                           | <i>E. coli</i><br><i>A. niger</i>                                                                                  | 6<br>0 mm                          |       |
| <i>Phyllanthus amarus</i>  | Leaves | Copper (II) sulfate 1 mM/ plant extract 25 % (4:1 v/v)<br>130°C<br>7 h<br>pH NM               | Spherical<br>20 nm    | Diffusion<br>35± 2°C<br>24 h<br>pH NM<br>1×10 <sup>6</sup> CFU/ml<br>Rifampicin**         | <i>E. coli</i><br><i>P. aeruginosa</i><br><i>B. subtilis</i><br><i>S. aureus</i>                                   | 24<br>25<br>31<br>38 mm            | [811] |
| <i>Cassia occidentalis</i> | Leaves | Copper (I) nitrate 1 mM/ plant extract 10 % (5:1 v/v)<br>Room temperature<br>4 h<br>pH NM     | Oval<br>30 nm         | Diffusion<br>37°C<br>24 h<br>pH NM<br>Inoculum size NM<br>Ciprofloxacin**<br>Gentamicin** | <i>S. aureus</i><br><i>E. coli</i><br><i>S.typhi</i><br><i>K. pneumonia</i>                                        | 5<br>8<br>11<br>9 mm               | [812] |
| <i>Oxalis corniculata</i>  | Leaves | Copper (II) sulfate 20 mM/ plant extract 10 % (1:1 v/v)<br>37°C<br>6 h<br>pH NM               | Spherical<br>78–80 nm | Diffusion<br>37°C<br>24 h<br>pH NM<br>Inoculum size NM<br>Cefixime**                      | <i>B. subtilis</i><br><i>S. aureus</i><br><i>E. coli</i><br><i>S. typhi</i><br><i>A. flavus</i><br><i>A. niger</i> | 24<br>0<br>21<br>11<br>15<br>17 mm | [813] |
| <i>Abutilon indicum</i>    | Leaves |                                                                                               | Spheroid<br>17 nm     | Diffusion<br>37°C                                                                         | <i>E. coli</i> ATCC 25922<br><i>S. aureus</i> ATCC 25923                                                           | 13<br>14                           | [814] |

|                                   |        |                                                                                                |                      |                                                                                    |                                                                                                                                     |                           |       |
|-----------------------------------|--------|------------------------------------------------------------------------------------------------|----------------------|------------------------------------------------------------------------------------|-------------------------------------------------------------------------------------------------------------------------------------|---------------------------|-------|
| <i>Clerodendrum infortunatum</i>  |        | Copper (I) nitrate 10 mM/ plant extract 10 % (1:1 v/v)<br>Room temperature<br>2-5 min<br>pH NM | Rod<br>18 nm         | 24 h<br>pH NM<br>Inoculum size NM<br>Cephadrine**                                  | <i>K. pneumoniae</i> ATCC 10031<br><i>B. subtilis</i> ATCC 9637                                                                     | 18<br>20 mm               |       |
| <i>Clerodendrum inerme</i>        |        |                                                                                                | Spheroid<br>21 nm    | Diffusion<br>37°C<br>24 h<br>pH NM<br>Inoculum size NM<br>Terbinafine**            | <i>A. niger</i> ATCC 16404<br><i>A. flavus</i> ATCC 9643<br><i>Trichoderma harzianum</i> ATCC 20846                                 | 17<br>15<br>24 mm         |       |
|                                   |        |                                                                                                |                      |                                                                                    |                                                                                                                                     |                           |       |
| <i>Olea europaea</i>              | Leaves | Copper (II) acetate 1 mM/ plant extract 10 % (1:2 v/v)<br>60°C<br>2 h<br>pH NM                 | Spherical<br>42 nm   | Diffusion<br>37°C<br>24 h<br>pH NM<br>Inoculum size NM<br>Roxithromycin 2000 µg/ml | <i>S. aureus</i> ATCC 6633<br><i>Micrococcus luteus</i> ATCC 10240<br><i>S. typhimurium</i> ATCC 14028<br><i>E. coli</i> ATCC 15224 | 11<br>10<br>7<br>9 mm     | [815] |
|                                   |        |                                                                                                |                      | Diffusion<br>25°C<br>24 h<br>pH NM<br>Inoculum size NM<br>Clotrimazole**           | <i>Aspergillus fumigatus</i> FCBP 66<br><i>Mucor species</i> FCBP 0300<br><i>A. niger</i> FCBP 0198<br><i>A. flavus</i> FCBP 0064   | 8<br>6.5<br>9.7<br>7.6 mm |       |
| <i>Tabernaemontana divaricate</i> | Leaves | Copper (II) sulfate 10 mM / plant extract 20 % (1:1 v/v)<br>100°C<br>7-8 h<br>pH NM            | Spherical<br>48±4 nm | Diffusion<br>37°C<br>24 h<br>pH NM<br>Inoculum size NM<br>Tetracycline 50 µg       | <i>E. coli</i>                                                                                                                      | 17 mm                     | [816] |

|                                 |        |                                                                                    |                       |                                                                                                                                                                                                                     |                                                                                                                                   |                                     |       |
|---------------------------------|--------|------------------------------------------------------------------------------------|-----------------------|---------------------------------------------------------------------------------------------------------------------------------------------------------------------------------------------------------------------|-----------------------------------------------------------------------------------------------------------------------------------|-------------------------------------|-------|
| <i>Persea americana</i>         | Seed   | Copper (II) sulfate 1 mM/ plant extract 1 % (2:5 v/v)<br>45-50°C<br>6-7 h<br>pH NM | Spherical<br>42-90 nm | Diffusion<br>Temperature NM<br>Incubation time NM<br>pH NM<br>Inoculum size NM<br>No control                                                                                                                        | <i>E. coli</i><br><i>Streptococcus spp</i><br><i>Klebsiella spp</i><br><i>Rhizobacterium spp</i>                                  | 15<br>20<br>12<br>22 mm             | [817] |
|                                 |        |                                                                                    |                       | Diffusion<br>Temperature NM<br>Incubation time NM<br>pH NM<br>Inoculum size NM<br>No control                                                                                                                        | <i>A. flavus</i><br><i>Aspergillus fumigates</i><br><i>Fusarium oxysporium</i>                                                    | 9<br>10<br>8 mm                     |       |
| <i>Pterospermum acerifolium</i> | Leaves | Copper (I) nitrate 1 mM/ plant extract 10 % (1:1 v/v)<br>45-50°C<br>24 h<br>pH NM  | Spherical<br>50 nm    | Diffusion<br>37°C<br>24 h<br>pH NM<br>Inoculum size NM<br>Ciprofloxacin**                                                                                                                                           | <i>B. subtilis</i><br><i>S. aureus</i><br><i>E. coli</i><br><i>S. typhi</i>                                                       | 13<br>12<br>11.<br>13 mm            | [818] |
| <i>Polygonum minus</i>          | Plant  | Copper (I) nitrate 1 mM/ plant extract 3 % (20:1 v/v)<br>60°C<br>5 min<br>pH NM    | Spherical<br>20-30 nm | Diffusion<br>37°C<br>24 h<br>pH NM<br>Inoculum size NM<br>No control                                                                                                                                                | <i>E. coli</i><br><i>S. aureus</i><br><i>Aeromonas hydrophilia</i>                                                                | 18<br>15<br>14 mm                   | [819] |
| <i>Falcaria vulgaris</i>        | Leaves | Copper (II) sulfate 40 mM/ plant extract 4 % (1:2 v/v)<br>60°C<br>1h<br>pH 12      | Spherical<br>20 nm    | Diffusion<br>37°C<br>24 h<br>pH NM<br>1×10 <sup>6</sup> CFU/ml<br>Difloxacin 30 µg/ml<br>Chloramphenicol 30 µg/ml<br>Streptomycin 10 µg/ml<br>Gentamycin 10 µg/ml<br>Oxytetracyclin 30 µg/ml<br>Ampicillin 10 µg/ml | <i>S. typhimurium</i><br><i>E. coli</i><br><i>P. aeruginosa</i><br><i>S. aureus</i><br><i>S. pneumoniae</i><br><i>B. subtilis</i> | 28<br>29<br>30<br>30<br>32<br>32 mm | [820] |

|                             |        |                                                                                           |                      |                                                                                                                                                                |                                                                                                                                                                                                                                                                        |                                               |       |
|-----------------------------|--------|-------------------------------------------------------------------------------------------|----------------------|----------------------------------------------------------------------------------------------------------------------------------------------------------------|------------------------------------------------------------------------------------------------------------------------------------------------------------------------------------------------------------------------------------------------------------------------|-----------------------------------------------|-------|
|                             |        |                                                                                           |                      | Amikacin 25 µg/ml                                                                                                                                              |                                                                                                                                                                                                                                                                        |                                               |       |
|                             |        |                                                                                           |                      | Diffusion<br>37°C<br>24 h<br>pH NM<br>1×10 <sup>6</sup> CFU/ml<br>Fluconazol 60 µg/ml<br>Itraconazol 60 µg/ml<br>Miconazol 60 µg/ml<br>Amphotericin B 60 µg/ml | <i>C. albicans</i><br><i>Candida glabrata</i><br><i>Candida guilliermondii</i><br><i>Candida krusei</i>                                                                                                                                                                | 21<br>22<br>27<br>26 mm                       |       |
| <i>Tinospora cardifolia</i> | Leaves | Copper (II) chloride<br>0.25 mM/ plant extract<br>25 % (5:1 v/v)<br>87°C<br>24 h<br>pH NM | Spherical<br>63 nm   | Diffusion<br>37°C<br>24 h<br>pH NM<br>Inoculum size NM<br>No control                                                                                           | <i>S. aureus</i> MTCC 3381<br><i>E. coli</i> MTCC 443                                                                                                                                                                                                                  | 23<br>17 mm                                   | [821] |
| <i>Malva sylvestris</i>     | Leaves | Copper (II) chloride 4<br>mM/ plant extract 1 %<br>(10:1 v/v)<br>80°C<br>2 min<br>pH NM   | Spherical<br>5–30 nm | Diffusion<br>37°C<br>24 h<br>pH NM<br>Inoculum size NM<br>No control                                                                                           | <i>Shigella flexneri</i><br><i>Listeria monocytogenes</i>                                                                                                                                                                                                              | 15<br>18 mm                                   | [822] |
| <i>Antigonon leptopus</i>   | Leaves | Copper (II) sulfate 1<br>mM/ plant extract 20<br>% (1:1 v/v)<br>80°C<br>15 min<br>pH NM   | Cuboid<br>110–280 nm | Diffusion<br>37°C<br>24 h<br>pH NM<br>5×10 <sup>5</sup> CFU/ml<br>Ampicillin 400 µg/µl                                                                         | <i>B. subtilis</i> MTCC 121<br><i>B. licheniformis</i> MTCC 429<br><i>S. aureus</i> MTCC 96<br><i>S. pneumoniae</i> MTCC 2672<br><i>E. coli</i> MTCC 118<br><i>K. pneumoniae</i> MTCC 2405<br><i>P. aeruginosa</i> MTCC 424<br><i>Sphingomonas sanguinis</i> MTCC 5495 | 12<br>13<br>11<br>12<br>12<br>10<br>8<br>6 mm | [823] |

|                           |       |                                                                                   |                       |                                                                                             |                                                                                                                                                                                                         |                                          |       |
|---------------------------|-------|-----------------------------------------------------------------------------------|-----------------------|---------------------------------------------------------------------------------------------|---------------------------------------------------------------------------------------------------------------------------------------------------------------------------------------------------------|------------------------------------------|-------|
| <i>Citrus reticulata</i>  | Peels | Copper (I) nitrate 0.1 mM / plant extract 3 % (9:1 v/v)<br>100°C<br>1 h<br>pH 5   | Spherical<br>8–9 nm   | Diffusion<br>37°C<br>24 h<br>pH NM<br>1×10 <sup>8</sup> CFU/ml<br>Ampicillin 10 µg          | <i>K. pneumoniae</i><br><i>P. aeruginosa</i><br><i>Shigella flexneri</i><br><i>S. aureus</i><br><i>Streptococcus pneumoniae</i><br><i>Campylobacter jejuni</i><br><i>S. typhimurium</i>                 | 18<br>12<br>20<br>3<br>18<br>16<br>28 mm | [337] |
| <i>Citrus sinensis</i>    |       |                                                                                   | Spherical<br>16-18 nm |                                                                                             | <i>K. pneumoniae</i><br><i>P. aeruginosa</i><br><i>Shigella flexneri</i><br><i>S. aureus</i><br><i>Streptococcus pneumoniae</i><br><i>Campylobacter jejuni</i><br><i>S. typhimurium</i>                 | 21<br>23<br>22<br>8<br>27<br>32<br>34 mm |       |
| <i>Citrus limon</i>       |       |                                                                                   | Spherical<br>18-30 nm |                                                                                             | <i>K. pneumoniae</i><br><i>P. aeruginosa</i><br><i>Shigella flexneri</i><br><i>S. aureus</i><br><i>Streptococcus pneumoniae</i><br><i>Campylobacter jejuni</i><br><i>S. typhimurium</i>                 | 3<br>13<br>3<br>2<br>17<br>32<br>19 mm   |       |
| <i>Quercus infectoria</i> | Galls | Copper (I) sulfate 5 mM/ plant extract 20 % (17:3 v/v)<br>85°C<br>15 min<br>pH NM | Spherical<br>20 nm    | Diffusion<br>37°C<br>24 h<br>pH NM<br>Inoculum size NM<br>Chloramphenicol**<br>Penicillin** | <i>B. cereus</i> ATCC 14579<br><i>S. aureus</i> ATCC12600<br><i>P. aeruginosa</i> ATCC 10145<br><i>E. coli</i> ATCC 11175<br><i>Acinetobacter baumannii</i> ATCC19606<br><i>K. pneumoniae</i> ATCC13883 | 24<br>31<br>20<br>25<br>23<br>28 mm      | [824] |
| <i>Citrus medica</i>      | Fruit | Copper (I) acetate 100 mM/ plant extract 10 % (1:1 v/v)<br>60-100°C<br>24 h       | Spherical<br>20 nm    | Diffusion<br>37°C<br>24 h<br>pH NM<br>2.18×10 <sup>8</sup> CFU/ml                           | <i>E. coli</i> ATCC 14948<br><i>S. typhi</i> ATCC 51812<br><i>Propionibacterium acnes</i> MTCC 1951<br><i>P. aeruginosa</i> MTCC 4676                                                                   | 26<br>19<br>19<br>21                     | [825] |



|                               |         |                                                                                            |                        |                                                                                  |                                                                                                            |                         |       |
|-------------------------------|---------|--------------------------------------------------------------------------------------------|------------------------|----------------------------------------------------------------------------------|------------------------------------------------------------------------------------------------------------|-------------------------|-------|
|                               |         | pH NM                                                                                      |                        | No control                                                                       | <i>K. pneumoniae</i> MTCC 4030<br><i>Fusarium oxysporum</i> MTCC 1755<br><i>Fusarium culmorum</i> MTCC 349 | 25<br>28<br>37 mm       |       |
| <i>Stachys lavandulifolia</i> | Flowers | Copper (II) chloride<br>100 mM /plant extract<br>10 % (2:1 v/v)<br>50°C<br>20 min<br>pH 10 | Spherical<br>80 nm     | Diffusion<br>37°C<br>24 h<br>pH NM<br>1×10 <sup>8</sup> CFU/ml<br>Streptomycin** | <i>P. aeruginosa</i>                                                                                       | 12 mm                   | [826] |
| <i>Magnolia kobus</i>         | Leaves  | Copper (II) sulfate 1<br>mM /plant extract 5 %<br>(17:3 v/v)<br>25-95°C<br>24 h<br>pH NM   | Spherical<br>50–250 nm | Dilution<br>37°C<br>24 h<br>pH NM<br>22,400 CFU/ml<br>No control                 | <i>E. coli</i> ATCC 25922                                                                                  | 99 %                    | [827] |
| <i>Millettia pinnata</i>      | Flowers | Copper (II) acetate<br>1 mM / plant extract<br>10 % (4:3 v/v)<br>60°C<br>20 min<br>pH NM   | Spherical<br>13–35 nm  | Diffusion<br>37°C<br>24 h<br>pH NM<br>Inoculum size NM<br>No control             | <i>P. aeruginosa</i><br><i>E. coli</i><br><i>S. aureus</i><br><i>B. subtilis</i>                           | 80<br>77<br>78<br>85 %  | [828] |
| <i>Celastrus paniculatus</i>  | Leaves  | Copper (II) sulfate<br>5 mM / plant extract<br>10 % (10:1 v/v)<br>60°C<br>20 min<br>pH NM  | Spherical<br>2-10 nm   | Diffusion<br>37°C<br>24 h<br>pH NM<br>Inoculum size NM<br>No control             | <i>Fusarium oxyporum</i>                                                                                   | 76 %                    | [829] |
| <i>Bambusa arundinacea</i>    | Leaves  | Copper (II) acetate<br>10 mM / plant extract<br>10% (2:1 v/v)<br>65°C<br>30 min<br>pH NM   | Spherical<br>24.4 nm   | Diffusion<br>37°C<br>24 h<br>pH NM<br>1×10 <sup>8</sup> CFU/ml<br>No control     | <i>B. subtilis</i><br><i>S. aureus</i><br><i>E. coli</i><br><i>P. vulgaris</i>                             | 19<br>16<br>22<br>19 mm | [830] |

\*MIC=minimal inhibition concentration; ZOI=zone of inhibition; PI=percentage of inhibition

\*\*The quantity or concentration is not mentioned.

NM=not mentioned, MRSA=methicillin-resistant *S. aureus*

Table S7. Antimicrobial green synthesized iron nanoparticles

| Plant type                   | Part used | Operative conditions for synthesis                                                            | NP characteristics (shape and size) | Microbiological analyses (operative conditions)                                          |                                                                                                                                                                                                 |                                              | Refs. |
|------------------------------|-----------|-----------------------------------------------------------------------------------------------|-------------------------------------|------------------------------------------------------------------------------------------|-------------------------------------------------------------------------------------------------------------------------------------------------------------------------------------------------|----------------------------------------------|-------|
|                              |           |                                                                                               |                                     | Methods, incubation temperature, incubation time, pH, inoculum density, positive control | Tested bacteria or fungi                                                                                                                                                                        | MIC, DOI or PI*                              |       |
| <i>Tridax procumbens</i>     | Leaves    | Iron (III) chloride 2 mM/ plant extract 15 % (1:1 v/v)<br>Room temperature<br>10 min<br>pH NM | Spherical<br>80–100 nm              | Diffusion<br>37°C<br>24 h<br>pH NM<br>Inoculum size NM<br>No control                     | <i>P. aeruginosa</i>                                                                                                                                                                            | 2 mm                                         | [831] |
| <i>Euphorbia helioscopia</i> | Leaves    | Iron nitrate 5 mM/ plant extract 10 % (1:5 v/v)<br>150°C<br>15 min<br>pH NM                   | Spherical<br>7–10 nm                | Diffusion<br>25°C<br>48 h<br>pH NM<br>Inoculum size NM<br>No control                     | <i>Cladosporium herbarum</i>                                                                                                                                                                    | 35 mm                                        | [832] |
| <i>Glycosmis mauritiana</i>  | Leaves    | Iron (III) chloride 2 mM/ plant extract 50 % (5:1 v/v)<br>80°C<br>20 min<br>pH 12             | Spherical<br>100 nm                 | Diffusion<br>37°C<br>24 h<br>pH NM<br>Inoculum size NM<br>Norfloxacin 20 µg              | <i>B. cereus</i><br><i>B. subtilis</i><br><i>Enterococcus faecalis</i><br><i>E. coli</i><br><i>K. pneumoniae</i><br><i>Micrococcus luteus</i><br><i>Proteus mirabilis</i><br><i>P. vulgaris</i> | 11<br>19<br>18<br>19<br>12<br>16<br>11<br>19 | [833] |

|                             |        |                                                                                  |                       |                                                                                     |                                                                                              |                         |       |
|-----------------------------|--------|----------------------------------------------------------------------------------|-----------------------|-------------------------------------------------------------------------------------|----------------------------------------------------------------------------------------------|-------------------------|-------|
|                             |        |                                                                                  |                       |                                                                                     | <i>Pseudomonas fluorescence</i><br><i>Vibrio fluvialis</i>                                   | 18<br>10 mm             |       |
| <i>Lawsonia inermis</i>     | Leaves | Iron (II) sulfate 10 mM/ plant extract 20 % (5:1 v/v)<br>70°C<br>5 min<br>pH NM  | Hexagonal<br>21 nm    | Diffusion<br>37°C<br>24 h<br>pH NM<br>Inoculum size NM<br>No control                | <i>E. coli</i><br><i>Salmonella enterica</i><br><i>Proteus mirabilis</i><br><i>S. aureus</i> | 14<br>9<br>11<br>15 mm  | [834] |
| <i>Gardenia jasminoides</i> |        |                                                                                  | Hexagonal<br>32 nm    |                                                                                     | <i>E. coli</i><br><i>Salmonella enterica</i><br><i>Proteus mirabilis</i><br><i>S. aureus</i> | 15<br>12<br>13<br>16 mm |       |
| <i>Phoenix dactylifera</i>  | Fruit  | Iron (III) chloride 100 mM/ plant extract 10 % (1:1 v/v)<br>80°C<br>2 h<br>pH NM | Spherical<br>20 nm    | Disc diffusion<br>37°C<br>24 h<br>pH NM<br>1×10 <sup>8</sup> CFU/ml<br>Gentamicin** | <i>S. epidermidis</i><br><i>K. pneumoniae</i><br><i>P. aeruginosa</i>                        | 25<br>24<br>25 mm       | [835] |
| <i>Euphorbia herita</i>     | Leaves | Iron (III) chloride 100 mM/plant extract 10 % (2:3 v/v)<br>Room<br>3 h<br>pH 9   | Irregular<br>25-80 nm | Diffusion<br>37°C<br>24 h<br>pH NM<br>Inoculum size NM<br>No control                | <i>Bacillus spp</i><br><i>E. coli</i><br><i>Pseudomonas spp</i>                              | 27.7<br>24.3<br>23.7 mm | [836] |
|                             |        |                                                                                  |                       | Diffusion<br>28°C<br>48 h<br>pH NM<br>Inoculum size NM<br>No control                | <i>Aspergillus fumigatus</i><br><i>A. niger</i><br><i>Arthogrophis cuboida</i>               | 21.7<br>18.7<br>25.3 mm |       |
| <i>Carica papaya</i>        | Leaves | Iron (III) chloride 100 mM/ plant extract 2 % (1:1 v/v)<br>80°C<br>3h            | Spherical<br>31.59 nm | Diffusion<br>37°C<br>24 h<br>pH NM<br>Inoculum size NM                              | <i>Klebsiella spp</i><br><i>E. coli</i><br><i>Pseudomonas spp</i><br><i>S. aureus</i>        | 9<br>9<br>10<br>12.5 mm | [837] |

|                          |        |                                                                                    |                                   |                                                                                                                                                                                                                            |                                                                                                    |                 |       |
|--------------------------|--------|------------------------------------------------------------------------------------|-----------------------------------|----------------------------------------------------------------------------------------------------------------------------------------------------------------------------------------------------------------------------|----------------------------------------------------------------------------------------------------|-----------------|-------|
|                          |        | pH NM                                                                              |                                   | No control                                                                                                                                                                                                                 |                                                                                                    |                 |       |
| <i>Laurus nobilis</i>    | Leaves | Iron (III) chloride 100 mM/plant extract 10 % (1:1 v/v)<br>Room<br>2.5 h<br>pH NM  | Hexagonal shape<br>8.09 ± 8.99 nm | Diffusion<br>37°C<br>24 h<br>pH NM<br>Inoculum size NM<br>Tetracycline 30 µg<br>Kanamycine 5 µg<br>Sulfamethoxazole 5 µg<br>Amoxicillin 25 µg<br>Cefixime 5 µg<br>Oxacillin 1 µg<br>Penicillin 10 unit<br>Novobiocin 30 µg | <i>S. aureus</i> PTCC 1189<br><i>E. coli</i> ATCC 23922<br><i>Listeria monocytogenes</i> PTCC 1294 | 0<br>0<br>12 mm | [838] |
|                          |        |                                                                                    |                                   | Diffusion<br>37°C<br>72 h<br>pH NM<br>Inoculum size NM<br>Nystatin 100 µg                                                                                                                                                  | <i>A. flavus</i> PTCC 5004<br><i>Penicillium spinulosum</i> PTCC 5251                              | 13<br>14 mm     |       |
| <i>Lawsonia inermis</i>  | Leaves | Iron (II) sulfate 20 mM/ plant extract 10 % (1:1 v/v)<br>60°C<br>30 min<br>pH 11   | Spherical<br>150-200 nm           | Diffusion<br>37°C<br>24 h<br>pH NM<br>Inoculum size NM<br>No control                                                                                                                                                       | <i>S. aureus</i><br><i>Staphylococcus typhimurium</i>                                              | 16<br>15 mm     | [839] |
| <i>Spinacia oleracea</i> | Leaves | Iron (III) sulfate 100 mM/ plant extract 20 % (2:1 v/v)<br>60°C<br>30 min<br>pH NM | Spherical<br>10-70 nm             | Diffusion<br>37°C<br>24 h<br>pH NM<br>Inoculum size NM<br>Tetracycline**<br>Gentamicin**                                                                                                                                   | <i>B. subtilis</i><br><i>E. coli</i>                                                               | 23.6<br>20.3 mm | [840] |
| <i>Musa acuminata</i>    | Peel   |                                                                                    | Spherical<br>20-50 nm             |                                                                                                                                                                                                                            | <i>B. subtilis</i><br><i>E. coli</i>                                                               | 22.7<br>20.5 mm |       |

|                             |         |                                                                                         |                       |                                                                                   |                                                                                                                              |                              |       |
|-----------------------------|---------|-----------------------------------------------------------------------------------------|-----------------------|-----------------------------------------------------------------------------------|------------------------------------------------------------------------------------------------------------------------------|------------------------------|-------|
| <i>Eucalyptus robusta</i>   | Leaves  | Iron (II) sulfate 5 mM/<br>plant extract 1 % (2:1<br>v/v)<br>40°C<br>30 min<br>pH NM    | Spherical<br>70 nm    | Diffusion<br>35± 2°C<br>24 h<br>pH NM<br>1×10 <sup>8</sup> CFU/ml<br>Gentamicin** | <i>E. coli</i><br><i>S. aureus</i><br><i>P. aeruginosa</i><br><i>B. subtilis</i>                                             | 1.8<br>1.8<br>1<br>3.9 mm    | [841] |
| <i>Chlorophytum comosum</i> | Leaves  | Iron (III) chloride 10<br>mM/ plant extract 5 %<br>(1:9 v/v)<br>50°C<br>12 h<br>pH NM   | Spherical<br>100 nm   | Dilution<br>37°C<br>18–24 h<br>pH NM<br>Inoculum size NM<br>No control            | <i>S. aureus</i><br><i>E. coli</i><br><i>P. aeruginosa</i><br><i>E. faecalis</i>                                             | 6<br>17<br>8<br>9 µg/ml      | [842] |
| <i>Acorus calamus</i>       | Rhizome | Iron (III) sulfate 1<br>mM/ plant extract 1 %<br>(1:1 v/v)<br>32± 2°C<br>3 min<br>pH NM | Spherical<br>20–30 nm | Diffusion<br>37±2°C<br>24 h<br>pH NM<br>5×10 <sup>8</sup> CFU/ml<br>No control    | <i>P. aeruginosa</i><br><i>Enterobacillus spp</i><br><i>B. subtilis</i><br><i>E. coli</i><br><i>S. aureus</i>                | 20<br>15<br>20<br>15<br>0 mm | [843] |
|                             |         |                                                                                         |                       | Diffusion<br>28±2°C<br>48 h<br>pH NM<br>4×10 <sup>7</sup> CFU/ml<br>No control    | <i>Penicillium notatum</i><br><i>A. niger</i><br><i>Rhizopus spp</i>                                                         | 23<br>20<br>20 mm            |       |
| <i>Cynometra ramiflora</i>  | Leaves  | Iron (II) sulfate 10<br>mM/ plant extract 10<br>% (2:1 v/v)<br>40°C<br>20 min<br>pH NM  | Spherical<br>20–40 nm | Diffusion<br>30°C<br>24 h<br>pH NM<br>Inoculum size NM<br>No control              | <i>E. coli</i><br><i>S. epidermidis</i>                                                                                      | 28<br>26 mm                  | [844] |
| <i>Aloe vera</i>            | Leaves  | Ferric chloride 1 mM/<br>plant extract 20 %<br>(1:1 v/v)<br>50– 60°C                    | Spherical<br>10–17 mm | Diffusion<br>37°C<br>18–24 h<br>pH NM                                             | <i>S. aureus</i> ATCC 2593<br><i>E. coli</i> ATCC 25922<br><i>P. mirabilis</i> ATCC 43071<br><i>P. aeruginosa</i> ATCC 27853 | 15<br>15<br>16<br>16         | [845] |

|                           |        |                                                                                          |                         |                                                                                                           |                                                                                                                                                                                                              |                                                 |       |
|---------------------------|--------|------------------------------------------------------------------------------------------|-------------------------|-----------------------------------------------------------------------------------------------------------|--------------------------------------------------------------------------------------------------------------------------------------------------------------------------------------------------------------|-------------------------------------------------|-------|
|                           |        | 15 min<br>pH NM                                                                          |                         | 5×10 <sup>6</sup> CFU/ml<br>Streptomycin 10 µg                                                            | <i>S. typhi</i> ATCC 13311<br><i>K. pneumoniae</i> ATCC 700603<br><i>Shigella flexneri</i> ATCC 12022<br><i>Serratia marcescens</i> ATCC 27137<br><i>Enterococcus faecalis</i> ATCC 29212                    | 16<br>17<br>14<br>15<br>15 mm                   |       |
| <i>Agrewia optiva</i>     | Leaves | Iron (II) chloride 100<br>mM/ plant extract 20<br>% (1:1 v/v)<br>70°C<br>40 min<br>pH NM | Spherical<br>15–60      | Diffusion<br>37°C<br>24 h<br>pH NM<br>1.5×10 <sup>8</sup> CFU/ml<br>Ciprofloxacin 5 µg<br>Gentamicin 10µg | <i>S. aureus</i><br><i>Streptococcus mutans</i><br><i>S. pyrogenes</i><br><i>Clostridium diphtheriae</i><br><i>Corynebacterium xerosis</i><br><i>E. coli</i><br><i>K. pneumoniae</i><br><i>P. aeruginosa</i> | 12<br>9<br>9<br>12<br>7<br>6<br>7<br>7 mm       | [846] |
| <i>Prunus persica</i>     |        |                                                                                          | Spherical<br>3–70 nm    |                                                                                                           | <i>S. aureus</i><br><i>Streptococcus mutans</i><br><i>S. pyrogenes</i><br><i>Clostridium diphtheriae</i><br><i>Corynebacterium xerosis</i><br><i>E. coli</i><br><i>K. pneumoniae</i><br><i>P. aeruginosa</i> | 13<br>14<br>13<br>12<br>10<br>12<br>20<br>14 mm |       |
| <i>Papaver somniferum</i> | Pods   | Iron (II) sulfate 5mM/<br>plant extract 5 % (5:1<br>v/v)<br>85°C<br>2 h<br>pH 5.7        | Irregular<br>38 ± 13 nm | Diffusion<br>37°C<br>24 h<br>pH NM<br>1×10 <sup>8</sup> CFU/ml<br>Ampicillin**<br>Gentamicin**            | <i>B. subtilis</i> ATCC 6633<br><i>S. epidermidis</i> ATCC 14990<br><i>K. pneumoniae</i> ATCC 4617<br><i>P. aeruginosa</i> ATCC 9721                                                                         | 7<br>8<br>8<br>7 mm                             | [847] |
|                           |        |                                                                                          |                         | Diffusion<br>37°C<br>48 h<br>pH NM<br>1×10 <sup>8</sup> CFU/ml<br>Amphotericin B**                        | <i>Fusarium solani</i> FCBP 0041<br><i>A. flavus</i> FCBP 0064<br><i>Aspergillus fumigates</i> FCBP 1264<br><i>A. niger</i> FCBP 0198<br><i>Mucor mycosis</i>                                                | 19<br>18<br>17<br>17<br>17 mm                   |       |

|                          |        |                                                                                               |                       |                                                                                                                                                                                                                      |                                                                                                                                                                                              |                                     |       |
|--------------------------|--------|-----------------------------------------------------------------------------------------------|-----------------------|----------------------------------------------------------------------------------------------------------------------------------------------------------------------------------------------------------------------|----------------------------------------------------------------------------------------------------------------------------------------------------------------------------------------------|-------------------------------------|-------|
| <i>Allium cepa</i>       | Root   | Iron (II) nitrate 20 mM/ plant extract 15 % (1:1 v/v)<br>90°C<br>60 min<br>pH NM              | Cubic<br>12–52 nm     | Diffusion<br>37°C<br>24 h<br>pH NM<br>Inoculum size NM<br>No control                                                                                                                                                 | <i>S. aureus</i><br><i>P. aeruginosa</i>                                                                                                                                                     | 17<br>18 mm                         | [848] |
| <i>Ricinus communis</i>  | Seeds  |                                                                                               | Hexagonal<br>20–99 nm |                                                                                                                                                                                                                      | <i>S. aureus</i><br><i>P. aeruginosa</i>                                                                                                                                                     | 21<br>25 mm                         |       |
| <i>Uvaria chamae</i>     | Leaves | Ferric chloride 10 mM/ plant extract 10 % (1:1 v/v)<br>Room temperature<br>10 min<br>pH NM    | Spherical<br>40 nm    | Diffusion<br>37°C<br>24 h<br>pH NM<br>1.5×10 <sup>8</sup> CFU/ml<br>Ampicillin+cloxacillin**                                                                                                                         | <i>E. coli</i><br><i>P. aeruginosa</i><br><i>B. subtilis</i><br><i>S. aureus</i>                                                                                                             | 11<br>11<br>14<br>15 mm             | [849] |
|                          |        |                                                                                               |                       | Diffusion<br>37°C<br>24 h<br>pH NM<br>1.5×10 <sup>8</sup> CFU/ml<br>Nystatin**                                                                                                                                       | <i>C. albicans</i><br><i>A. niger</i>                                                                                                                                                        | 17<br>16 mm                         |       |
| <i>Falcaria vulgaris</i> | Leaves | Iron (III) chloride 100 mM/ plant extract 10 % (1:9 v/v)<br>Room temperature<br>24 h<br>pH NM | Spherical<br>25 nm    | Diffusion<br>37°C<br>24 h<br>pH NM<br>1×10 <sup>8</sup> CFU/ml<br>Difloxacin 30 µg<br>Chloramphenicol 30 µg<br>Streptomycin 10 µg<br>Gentamycin 10 µg<br>Oxytetracycline 30 µg<br>Ampicillin 10 µg<br>Amikacin 25 µg | <i>S. typhi</i> ATCC 14028<br><i>E. coli</i> ATCC 25922<br><i>P. aeruginosa</i> ATCC 27853<br><i>S. aureus</i> ATCC 25923<br><i>S. pneumoniae</i> ATCC 49619<br><i>B. subtilis</i> ATCC 6633 | 25<br>26<br>27<br>29<br>30<br>31 mm | [850] |

|                            |        |                                                                                  |                       |                                                                                                                                                                         |                                                                                                                                               |                               |       |
|----------------------------|--------|----------------------------------------------------------------------------------|-----------------------|-------------------------------------------------------------------------------------------------------------------------------------------------------------------------|-----------------------------------------------------------------------------------------------------------------------------------------------|-------------------------------|-------|
|                            |        |                                                                                  |                       | Diffusion<br>37°C<br>24 h<br>pH NM<br>1×10 <sup>6</sup> CFU/ml<br>Fluconazole 60 µg<br>Miconazole 60 µg<br>Itraconazole 60 µg<br>Amphotericin B 60 µg<br>Nystatin 60 µg | <i>C. albicans</i> PFCC 89<br><i>Candida glabrata</i> ATCC 14028<br><i>Candida krusei</i> PFCC 52951<br><i>Candida guilliermondii</i> PFCC 88 | 33<br>34<br>37<br>36 mm       |       |
| <i>Citrullus colocynth</i> | Seed   | Iron (III) chloride 500 mM/ extract 5 %<br>(1:1v/v)<br>70°C<br>25 min<br>pH NM   | Spherical<br>6–15 nm  | Diffusion<br>30°C<br>24 h<br>pH NM<br>Inoculum size NM<br>No control                                                                                                    | <i>S. aureus</i><br><i>B. subtilis</i><br><i>E. coli</i><br><i>P. aeruginosa</i><br><i>C. albicans</i>                                        | 95<br>99<br>88<br>90<br>87 %  | [851] |
| <i>Azadirachta indica</i>  | Leaves | Iron (II) chloride 100 mM/ plant extract 10 % (1:2 v/v)<br>60°C<br>72 h<br>pH NM | Clusters<br>20–80 nm  | Dilution<br>28± 2°C<br>5 days<br>pH NM<br>Inoculum size NM<br>No control                                                                                                | <i>Alternaria mali</i><br><i>Botryosphaeria dothidea</i><br><i>Diplodia seriata</i>                                                           | 82.5<br>80.3<br>79.2 %        | [852] |
| <i>Sageretia thea</i>      | Leaves | Iron sulfate 1 mM/<br>plant extract 15 % (1:1 v/v)<br>85°C<br>2 h<br>pH 5.7      | Tetragonal<br>30 nm   | Diffusion<br>37°C<br>24 h<br>pH NM<br>1×10 <sup>8</sup> CFU/ml<br>Gentamicin 10 µg                                                                                      | <i>E. coli</i><br><i>B. subtilis</i><br><i>S. epidermidis</i><br><i>K. pneumoniae</i><br><i>P. aeruginosa</i>                                 | 15<br>17<br>19<br>17<br>20 mm | [853] |
| <i>Passiflora foetida</i>  | Leaves | Ferrous sulfate 1 mM/<br>plant extract 5 % (1:1 v/v)<br>80°C<br>1 h              | Spherical<br>10–16 nm | Diffusion<br>37°C<br>24 h<br>pH NM<br>Inoculum size NM                                                                                                                  | <i>Vibrio cholera</i><br><i>Streptococcus pyogenes</i><br><i>Shigella flexneri</i>                                                            | 8<br>10<br>10 mm              | [854] |



|  |  |       |  |            |  |  |  |
|--|--|-------|--|------------|--|--|--|
|  |  | pH NM |  | No control |  |  |  |
|--|--|-------|--|------------|--|--|--|

\*MIC=minimal inhibition concentration; ZOI=zone of inhibition; PI=percentage of inhibition

\*\*The quantity or concentration is not mentioned.

NM=not mentioned, MRSA=methicillin-resistant *S. aureus*
